# Supplementary material
Source: publisher figshare collection journal article supplement (https://wiley.figshare.com/ndownloader/files/17599181)
Supplement: Supplementary file 1 [file 17599181]

PHOTO_FILE_NAME	PHOTO_TIMESTAMP	LATITUDE_WGS84	LONGITUDE_WGS84	ALTITUDE	SURVEY_TYPE	COUNT_ADULT	COUNT_PUP	KELP_PRESENT	LAND_PRESENT	IMAGE_QUALITY	COUNTED_BY	COUNTED_DATE	PROTOCOL_ID	QUALITY_FLAG
SO_C_20170719_R_0001.JPG	2017-07-19 12:39:00	58.397225	-135.9020944	212	Random	0	0	0	1	Good	LFT	2017-09-08	SO-2017.1	0
SO_C_20170719_R_0002.JPG	2017-07-19 12:39:01	58.39735833	-135.9029139	212	Random	0	0	0	1	Good	LFT	2017-09-08	SO-2017.1	0
SO_C_20170719_R_0003.JPG	2017-07-19 12:39:02	58.397475	-135.9037361	212	Random	0	0	0	1	Good	LFT	2017-09-08	SO-2017.1	0
SO_C_20170719_R_0004.JPG	2017-07-19 12:39:03	58.39757778	-135.9045583	212	Random	0	0	0	1	Good	LFT	2017-09-08	SO-2017.1	0
SO_C_20170719_R_0005.JPG	2017-07-19 12:39:04	58.39767222	-135.9053806	212	Random	0	0	0	1	Good	LFT	2017-09-08	SO-2017.1	0
SO_C_20170719_R_0006.JPG	2017-07-19 12:39:05	58.39776111	-135.9062	213	Random	0	0	0	1	Good	LFT	2017-09-08	SO-2017.1	0
SO_C_20170719_R_0007.JPG	2017-07-19 12:39:06	58.39785	-135.9070167	212	Random	0	0	0	1	Good	LFT	2017-09-08	SO-2017.1	0
SO_C_20170719_R_0008.JPG	2017-07-19 12:39:07	58.39793333	-135.9078306	212	Random	0	0	0	1	Good	LFT	2017-09-08	SO-2017.1	0
SO_C_20170719_R_0009.JPG	2017-07-19 12:39:08	58.39801389	-135.9086389	211	Random	0	0	0	1	Good	LFT	2017-09-08	SO-2017.1	0
SO_C_20170719_R_0010.JPG	2017-07-19 12:39:09	58.39809722	-135.9094472	211	Random	0	0	1	1	Good	LFT	2017-09-08	SO-2017.1	0
SO_C_20170719_R_0011.JPG	2017-07-19 12:39:10	58.398175	-135.9102583	212	Random	0	0	1	0	Good	LFT	2017-09-08	SO-2017.1	0
SO_C_20170719_R_0012.JPG	2017-07-19 12:39:11	58.39824444	-135.9110722	212	Random	0	0	1	0	Good	LFT	2017-09-08	SO-2017.1	0
SO_C_20170719_R_0013.JPG	2017-07-19 12:39:12	58.39830278	-135.9118917	212	Random	0	0	1	0	Good	LFT	2017-09-08	SO-2017.1	0
SO_C_20170719_R_0014.JPG	2017-07-19 12:39:13	58.39835	-135.9127139	212	Random	0	0	1	0	Good	LFT	2017-09-08	SO-2017.1	0
SO_C_20170719_R_0015.JPG	2017-07-19 12:39:14	58.39838333	-135.9135361	212	Random	0	0	1	0	Good	LFT	2017-09-08	SO-2017.1	0
SO_C_20170719_R_0016.JPG	2017-07-19 12:39:15	58.3984	-135.9143611	211	Random	0	0	0	0	Good	LFT	2017-09-08	SO-2017.1	0
SO_C_20170719_R_0017.JPG	2017-07-19 12:39:16	58.39840278	-135.9151806	211	Random	0	0	0	0	Good	LFT	2017-09-08	SO-2017.1	0
SO_C_20170719_R_0018.JPG	2017-07-19 12:39:17	58.39838889	-135.9159972	211	Random	0	0	0	0	Good	LFT	2017-09-08	SO-2017.1	0
SO_C_20170719_R_0019.JPG	2017-07-19 12:39:18	58.39835833	-135.9168056	211	Random	0	0	0	0	Good	LFT	2017-09-08	SO-2017.1	0
SO_C_20170719_R_0020.JPG	2017-07-19 12:39:19	58.398325	-135.9176139	211	Random	0	0	0	0	Good	LFT	2017-09-08	SO-2017.1	0
SO_C_20170719_R_0021.JPG	2017-07-19 12:39:20	58.39829167	-135.9184222	211	Random	0	0	0	0	Good	LFT	2017-09-08	SO-2017.1	0
SO_C_20170719_R_0022.JPG	2017-07-19 12:39:21	58.39824722	-135.919225	211	Random	0	0	0	0	Good	LFT	2017-09-08	SO-2017.1	0
SO_C_20170719_R_0023.JPG	2017-07-19 12:39:22	58.39820278	-135.9200278	212	Random	0	0	0	0	Good	LFT	2017-09-08	SO-2017.1	0
SO_C_20170719_R_0024.JPG	2017-07-19 12:39:23	58.39815833	-135.9208306	213	Random	0	0	0	0	Good	LFT	2017-09-08	SO-2017.1	0
SO_C_20170719_R_0025.JPG	2017-07-19 12:39:24	58.39811667	-135.9216306	213	Random	0	0	0	0	Good	LFT	2017-09-08	SO-2017.1	0
SO_C_20170719_R_0026.JPG	2017-07-19 12:39:25	58.398075	-135.9224278	214	Random	0	0	0	0	Good	LFT	2017-09-08	SO-2017.1	0
SO_C_20170719_R_0027.JPG	2017-07-19 12:39:26	58.39803333	-135.9232278	214	Random	0	0	0	0	Good	LFT	2017-09-08	SO-2017.1	0
SO_C_20170719_R_0028.JPG	2017-07-19 12:39:27	58.39799722	-135.924025	215	Random	0	0	0	0	Good	LFT	2017-09-08	SO-2017.1	0
SO_C_20170719_R_0029.JPG	2017-07-19 12:39:28	58.39796111	-135.924825	215	Random	0	0	0	0	Good	LFT	2017-09-08	SO-2017.1	0
SO_C_20170719_R_0030.JPG	2017-07-19 12:39:29	58.397925	-135.9256222	215	Random	0	0	0	0	Good	LFT	2017-09-08	SO-2017.1	0
SO_C_20170719_R_0031.JPG	2017-07-19 12:39:30	58.39788889	-135.9264194	215	Random	0	0	0	0	Good	LFT	2017-09-08	SO-2017.1	0
SO_C_20170719_R_0032.JPG	2017-07-19 12:39:31	58.39785556	-135.9272194	215	Random	0	0	0	0	Good	LFT	2017-09-08	SO-2017.1	0
SO_C_20170719_R_0033.JPG	2017-07-19 12:39:32	58.39782222	-135.9280222	215	Random	0	0	0	0	Good	LFT	2017-09-08	SO-2017.1	0
SO_C_20170719_R_0034.JPG	2017-07-19 12:39:33	58.39778889	-135.928825	215	Random	0	0	0	0	Good	LFT	2017-09-08	SO-2017.1	0
SO_C_20170719_R_0035.JPG	2017-07-19 12:39:34	58.39775833	-135.9296278	216	Random	0	0	0	0	Good	LFT	2017-09-08	SO-2017.1	0
SO_C_20170719_R_0036.JPG	2017-07-19 12:39:35	58.39773333	-135.9304361	216	Random	0	0	0	0	Good	LFT	2017-09-08	SO-2017.1	0
SO_C_20170719_R_0037.JPG	2017-07-19 12:39:36	58.39771111	-135.9312444	216	Random	0	0	0	0	Good	LFT	2017-09-08	SO-2017.1	0
SO_C_20170719_R_0038.JPG	2017-07-19 12:39:37	58.39768889	-135.9320556	216	Random	0	0	0	0	Good	LFT	2017-09-08	SO-2017.1	0
SO_C_20170719_R_0039.JPG	2017-07-19 12:39:38	58.39766667	-135.9328667	216	Random	0	0	0	0	Good	LFT	2017-09-08	SO-2017.1	0
SO_C_20170719_R_0040.JPG	2017-07-19 12:39:39	58.39764444	-135.9336806	215	Random	0	0	0	0	Good	LFT	2017-09-08	SO-2017.1	0
SO_C_20170719_R_0041.JPG	2017-07-19 12:39:40	58.397625	-135.9345	215	Random	0	0	1	0	Good	LFT	2017-09-08	SO-2017.1	0
SO_C_20170719_R_0042.JPG	2017-07-19 12:39:41	58.39760278	-135.9353167	215	Random	0	0	0	0	Good	LFT	2017-09-08	SO-2017.1	0
SO_C_20170719_R_0043.JPG	2017-07-19 12:39:42	58.39758056	-135.9361389	215	Random	0	0	0	0	Good	LFT	2017-09-08	SO-2017.1	0
SO_C_20170719_R_0044.JPG	2017-07-19 12:39:43	58.39755833	-135.9369611	216	Random	0	0	0	0	Good	LFT	2017-09-08	SO-2017.1	0
SO_C_20170719_R_0045.JPG	2017-07-19 12:39:44	58.39753056	-135.9377833	216	Random	0	0	0	0	Good	LFT	2017-09-08	SO-2017.1	0
SO_C_20170719_R_0046.JPG	2017-07-19 12:39:45	58.39750556	-135.9386083	216	Random	0	0	0	0	Good	LFT	2017-09-08	SO-2017.1	0
SO_C_20170719_R_0047.JPG	2017-07-19 12:39:46	58.39747778	-135.9394361	216	Random	0	0	0	0	Good	LFT	2017-09-08	SO-2017.1	0
SO_C_20170719_R_0048.JPG	2017-07-19 12:39:47	58.39745278	-135.9402611	217	Random	0	0	0	0	Good	LFT	2017-09-08	SO-2017.1	0
SO_C_20170719_R_0049.JPG	2017-07-19 12:39:48	58.397425	-135.9410889	218	Random	0	0	1	0	Good	LFT	2017-09-08	SO-2017.1	0
SO_C_20170719_R_0050.JPG	2017-07-19 12:39:49	58.39739444	-135.9419139	218	Random	0	0	0	0	Good	LFT	2017-09-08	SO-2017.1	0
SO_C_20170719_R_0051.JPG	2017-07-19 12:39:50	58.39736667	-135.9427389	220	Random	0	0	0	0	Good	LFT	2017-09-11	SO-2017.1	0
SO_C_20170719_R_0052.JPG	2017-07-19 12:39:51	58.39733889	-135.9435611	222	Random	0	0	1	0	Good	LFT	2017-09-11	SO-2017.1	0
SO_C_20170719_R_0053.JPG	2017-07-19 12:39:52	58.39731111	-135.9443833	223	Random	0	0	0	0	Good	LFT	2017-09-11	SO-2017.1	0
SO_C_20170719_R_0054.JPG	2017-07-19 12:39:53	58.39728333	-135.9452056	223	Random	0	0	1	0	Good	LFT	2017-09-11	SO-2017.1	0
SO_C_20170719_R_0055.JPG	2017-07-19 12:39:54	58.39725833	-135.9460306	223	Random	0	0	1	0	Good	LFT	2017-09-11	SO-2017.1	0
SO_C_20170719_R_0056.JPG	2017-07-19 12:39:55	58.39723333	-135.9468556	223	Random	0	0	1	0	Good	LFT	2017-09-11	SO-2017.1	0
SO_C_20170719_R_0057.JPG	2017-07-19 12:39:56	58.39720833	-135.9476861	223	Random	0	0	1	0	Good	LFT	2017-09-11	SO-2017.1	0
SO_C_20170719_R_0058.JPG	2017-07-19 12:39:57	58.39718333	-135.9485167	223	Random	0	0	1	0	Good	LFT	2017-09-11	SO-2017.1	0
SO_C_20170719_R_0059.JPG	2017-07-19 12:39:58	58.39715556	-135.94935	223	Random	0	0	0	0	Good	LFT	2017-09-11	SO-2017.1	0
SO_C_20170719_R_0060.JPG	2017-07-19 12:39:59	58.39713056	-135.9501889	223	Random	0	0	0	0	Good	LFT	2017-09-11	SO-2017.1	0
SO_C_20170719_R_0061.JPG	2017-07-19 12:40:00	58.39710556	-135.9510278	222	Random	0	0	0	0	Good	LFT	2017-09-11	SO-2017.1	0
SO_C_20170719_R_0062.JPG	2017-07-19 12:40:01	58.39707778	-135.9518694	221	Random	0	0	0	0	Good	LFT	2017-09-11	SO-2017.1	0
SO_C_20170719_R_0063.JPG	2017-07-19 12:40:02	58.39704722	-135.9527139	220	Random	0	0	0	0	Good	LFT	2017-09-11	SO-2017.1	0
SO_C_20170719_R_0064.JPG	2017-07-19 12:40:03	58.39701667	-135.9535583	219	Random	0	0	0	0	Good	LFT	2017-09-11	SO-2017.1	0
SO_C_20170719_R_0065.JPG	2017-07-19 12:40:04	58.39698611	-135.9544056	218	Random	0	0	0	0	Good	LFT	2017-09-11	SO-2017.1	0
SO_C_20170719_R_0066.JPG	2017-07-19 12:40:05	58.39695556	-135.9552556	218	Random	0	0	0	0	Good	LFT	2017-09-11	SO-2017.1	0
SO_C_20170719_R_0067.JPG	2017-07-19 12:40:06	58.39692222	-135.9561056	217	Random	0	0	0	0	Good	LFT	2017-09-11	SO-2017.1	0
SO_C_20170719_R_0068.JPG	2017-07-19 12:40:07	58.39688611	-135.9569556	216	Random	0	0	0	0	Good	LFT	2017-09-11	SO-2017.1	0
SO_C_20170719_R_0069.JPG	2017-07-19 12:40:08	58.39684722	-135.9578028	215	Random	0	0	0	0	Good	LFT	2017-09-11	SO-2017.1	0
SO_C_20170719_R_0070.JPG	2017-07-19 12:40:09	58.39680833	-135.9586472	215	Random	0	0	0	0	Good	LFT	2017-09-11	SO-2017.1	0
SO_C_20170719_R_0071.JPG	2017-07-19 12:40:10	58.39676667	-135.9594889	216	Random	0	0	0	0	Good	LFT	2017-09-11	SO-2017.1	0
SO_C_20170719_R_0072.JPG	2017-07-19 12:40:11	58.39672778	-135.9603278	218	Random	0	0	0	0	Good	LFT	2017-09-11	SO-2017.1	0
SO_C_20170719_R_0073.JPG	2017-07-19 12:40:12	58.39669167	-135.9611611	218	Random	0	0	0	0	Good	LFT	2017-09-11	SO-2017.1	0
SO_C_20170719_R_0074.JPG	2017-07-19 12:40:13	58.39665278	-135.9619944	219	Random	0	0	0	0	Good	LFT	2017-09-11	SO-2017.1	0
SO_C_20170719_R_0075.JPG	2017-07-19 12:40:14	58.39661944	-135.9628278	220	Random	0	0	0	0	Good	LFT	2017-09-11	SO-2017.1	0
SO_C_20170719_R_0076.JPG	2017-07-19 12:40:15	58.39658611	-135.9636583	220	Random	0	0	0	0	Good	LFT	2017-09-11	SO-2017.1	0
SO_C_20170719_R_0077.JPG	2017-07-19 12:40:16	58.39655556	-135.9644889	221	Random	0	0	0	0	Good	LFT	2017-09-11	SO-2017.1	0
SO_C_20170719_R_0078.JPG	2017-07-19 12:40:17	58.39653056	-135.9653222	221	Random	0	0	0	0	Good	LFT	2017-09-11	SO-2017.1	0
SO_C_20170719_R_0079.JPG	2017-07-19 12:40:18	58.39650833	-135.9661583	221	Random	0	0	0	0	Good	LFT	2017-09-11	SO-2017.1	0
SO_C_20170719_R_0080.JPG	2017-07-19 12:40:19	58.39648611	-135.9669972	220	Random	0	0	0	0	Good	LFT	2017-09-11	SO-2017.1	0
SO_C_20170719_R_0081.JPG	2017-07-19 12:40:20	58.39646667	-135.9678389	219	Random	0	0	0	0	Good	LFT	2017-09-11	SO-2017.1	0
SO_C_20170719_R_0082.JPG	2017-07-19 12:40:21	58.39644722	-135.9686833	218	Random	0	0	0	0	Good	LFT	2017-09-11	SO-2017.1	0
SO_C_20170719_R_0083.JPG	2017-07-19 12:40:22	58.396425	-135.9695306	217	Random	0	0	0	0	Good	LFT	2017-09-11	SO-2017.1	0
SO_C_20170719_R_0084.JPG	2017-07-19 12:40:23	58.39640278	-135.9703778	217	Random	0	0	0	0	Good	LFT	2017-09-11	SO-2017.1	0
SO_C_20170719_R_0085.JPG	2017-07-19 12:40:24	58.39637778	-135.971225	217	Random	0	0	0	0	Good	LFT	2017-09-11	SO-2017.1	0
SO_C_20170719_R_0086.JPG	2017-07-19 12:40:25	58.39635278	-135.9720722	217	Random	0	0	0	0	Good	LFT	2017-09-11	SO-2017.1	0
SO_C_20170719_R_0087.JPG	2017-07-19 12:40:26	58.396325	-135.9729167	218	Random	0	0	0	0	Good	LFT	2017-09-11	SO-2017.1	0
SO_C_20170719_R_0088.JPG	2017-07-19 12:40:27	58.39629722	-135.9737556	219	Random	0	0	0	0	Good	LFT	2017-09-11	SO-2017.1	0
SO_C_20170719_R_0089.JPG	2017-07-19 12:40:28	58.39626944	-135.9745917	219	Random	0	0	0	0	Good	LFT	2017-09-11	SO-2017.1	0
SO_C_20170719_R_0090.JPG	2017-07-19 12:40:29	58.39624167	-135.975425	221	Random	0	0	0	0	Good	LFT	2017-09-11	SO-2017.1	0
SO_C_20170719_R_0091.JPG	2017-07-19 12:40:30	58.39621667	-135.9762556	222	Random	0	0	0	0	Good	LFT	2017-09-11	SO-2017.1	0
SO_C_20170719_R_0092.JPG	2017-07-19 12:40:31	58.39618611	-135.9770833	223	Random	0	0	0	0	Good	LFT	2017-09-11	SO-2017.1	0
SO_C_20170719_R_0093.JPG	2017-07-19 12:40:32	58.39615833	-135.9779083	224	Random	0	0	0	0	Good	LFT	2017-09-11	SO-2017.1	0
SO_C_20170719_R_0094.JPG	2017-07-19 12:40:33	58.396125	-135.9787333	224	Random	0	0	0	0	Good	LFT	2017-09-11	SO-2017.1	0
SO_C_20170719_R_0095.JPG	2017-07-19 12:40:34	58.39609444	-135.9795611	225	Random	0	0	0	0	Good	LFT	2017-09-11	SO-2017.1	0
SO_C_20170719_R_0096.JPG	2017-07-19 12:40:35	58.39606389	-135.9803889	224	Random	0	0	0	0	Good	LFT	2017-09-11	SO-2017.1	0
SO_C_20170719_R_0097.JPG	2017-07-19 12:40:36	58.39603333	-135.9812222	223	Random	0	0	0	0	Good	LFT	2017-09-11	SO-2017.1	0
SO_C_20170719_R_0098.JPG	2017-07-19 12:40:37	58.39600278	-135.9820583	222	Random	0	0	0	0	Good	LFT	2017-09-11	SO-2017.1	0
SO_C_20170719_R_0099.JPG	2017-07-19 12:40:38	58.39597222	-135.9828944	221	Random	0	0	0	0	Good	LFT	2017-09-11	SO-2017.1	0
SO_C_20170719_R_0100.JPG	2017-07-19 12:40:39	58.39594444	-135.9837361	220	Random	0	0	0	0	Good	LFT	2017-09-11	SO-2017.1	0
SO_C_20170719_R_0101.JPG	2017-07-19 12:40:40	58.39591389	-135.9845778	219	Random	1	0	0	0	Good	LFT	2017-09-26	SO-2017.1	0
SO_C_20170719_R_0102.JPG	2017-07-19 12:40:41	58.39587778	-135.9854167	219	Random	0	0	0	0	Good	LFT	2017-09-12	SO-2017.1	0
SO_C_20170719_R_0103.JPG	2017-07-19 12:40:42	58.39584444	-135.9862583	218	Random	0	0	0	0	Good	LFT	2017-09-12	SO-2017.1	0
SO_C_20170719_R_0104.JPG	2017-07-19 12:40:43	58.39580833	-135.9871	218	Random	1	0	0	0	Good	LFT	2017-09-26	SO-2017.1	0
SO_C_20170719_R_0105.JPG	2017-07-19 12:40:44	58.39576944	-135.9879389	219	Random	0	0	0	0	Good	LFT	2017-09-12	SO-2017.1	0
SO_C_20170719_R_0106.JPG	2017-07-19 12:40:45	58.39573056	-135.988775	219	Random	0	0	1	0	Good	LFT	2017-09-12	SO-2017.1	0
SO_C_20170719_R_0107.JPG	2017-07-19 12:40:46	58.39568889	-135.9896111	220	Random	0	0	1	0	Good	LFT	2017-09-12	SO-2017.1	0
SO_C_20170719_R_0108.JPG	2017-07-19 12:40:47	58.39564722	-135.9904444	220	Random	0	0	0	0	Good	LFT	2017-09-12	SO-2017.1	0
SO_C_20170719_R_0109.JPG	2017-07-19 12:40:48	58.39560833	-135.9912778	221	Random	0	0	0	0	Good	LFT	2017-09-12	SO-2017.1	0
SO_C_20170719_R_0110.JPG	2017-07-19 12:40:49	58.39557222	-135.9921111	221	Random	0	0	0	0	Good	LFT	2017-09-12	SO-2017.1	0
SO_C_20170719_R_0111.JPG	2017-07-19 12:40:50	58.39553611	-135.9929444	221	Random	0	0	0	0	Good	LFT	2017-09-12	SO-2017.1	0
SO_C_20170719_R_0112.JPG	2017-07-19 12:40:51	58.3955	-135.993775	221	Random	0	0	0	0	Good	LFT	2017-09-12	SO-2017.1	0
SO_C_20170719_R_0113.JPG	2017-07-19 12:40:52	58.39546389	-135.9946028	222	Random	0	0	0	0	Good	LFT	2017-09-12	SO-2017.1	0
SO_C_20170719_R_0114.JPG	2017-07-19 12:40:53	58.39542778	-135.9954306	222	Random	0	0	0	0	Good	LFT	2017-09-12	SO-2017.1	0
SO_C_20170719_R_0115.JPG	2017-07-19 12:40:54	58.39539444	-135.9962583	221	Random	0	0	0	0	Good	LFT	2017-09-12	SO-2017.1	0
SO_C_20170719_R_0116.JPG	2017-07-19 12:40:55	58.39536389	-135.9970889	221	Random	0	0	0	0	Good	LFT	2017-09-12	SO-2017.1	0
SO_C_20170719_R_0117.JPG	2017-07-19 12:40:56	58.39533333	-135.9979194	220	Random	2	0	1	0	Good	LFT	2017-09-26	SO-2017.1	0
SO_C_20170719_R_0118.JPG	2017-07-19 12:40:57	58.39530556	-135.99875	220	Random	1	0	1	0	Good	LFT	2017-09-26	SO-2017.1	0
SO_C_20170719_R_0119.JPG	2017-07-19 12:40:58	58.39527778	-135.9995806	219	Random	0	0	0	0	Good	LFT	2017-09-12	SO-2017.1	0
SO_C_20170719_R_0120.JPG	2017-07-19 12:40:59	58.39524722	-136.0004111	219	Random	0	0	0	0	Good	LFT	2017-09-12	SO-2017.1	0
SO_C_20170719_R_0121.JPG	2017-07-19 12:41:00	58.39521667	-136.0012389	220	Random	0	0	0	0	Good	LFT	2017-09-12	SO-2017.1	0
SO_C_20170719_R_0122.JPG	2017-07-19 12:41:01	58.39518333	-136.0020639	220	Random	0	0	0	0	Good	LFT	2017-09-12	SO-2017.1	0
SO_C_20170719_R_0123.JPG	2017-07-19 12:41:02	58.39515278	-136.0028889	220	Random	0	0	0	0	Good	LFT	2017-09-12	SO-2017.1	0
SO_C_20170719_R_0124.JPG	2017-07-19 12:41:03	58.39511944	-136.0037111	221	Random	0	0	0	0	Good	LFT	2017-09-12	SO-2017.1	0
SO_C_20170719_R_0125.JPG	2017-07-19 12:41:04	58.39509167	-136.0045333	221	Random	0	0	0	0	Good	LFT	2017-09-12	SO-2017.1	0
SO_C_20170719_R_0126.JPG	2017-07-19 12:41:05	58.39506111	-136.0053528	221	Random	0	0	0	0	Good	LFT	2017-09-12	SO-2017.1	0
SO_C_20170719_R_0127.JPG	2017-07-19 12:41:06	58.39503056	-136.0061722	221	Random	0	0	0	0	Good	LFT	2017-09-12	SO-2017.1	0
SO_C_20170719_R_0128.JPG	2017-07-19 12:41:07	58.39499722	-136.0069889	221	Random	0	0	0	0	Good	LFT	2017-09-12	SO-2017.1	0
SO_C_20170719_R_0129.JPG	2017-07-19 12:41:08	58.39496389	-136.0078056	221	Random	0	0	0	0	Good	LFT	2017-09-12	SO-2017.1	0
SO_C_20170719_R_0130.JPG	2017-07-19 12:41:09	58.39492778	-136.0086222	221	Random	0	0	0	0	Good	LFT	2017-09-12	SO-2017.1	0
SO_C_20170719_R_0131.JPG	2017-07-19 12:41:10	58.39489444	-136.0094389	221	Random	0	0	0	0	Good	LFT	2017-09-12	SO-2017.1	0
SO_C_20170719_R_0132.JPG	2017-07-19 12:41:11	58.39485833	-136.0102528	222	Random	1	0	0	0	Good	LFT	2017-09-26	SO-2017.1	0
SO_C_20170719_R_0133.JPG	2017-07-19 12:41:12	58.39482222	-136.0110667	221	Random	0	0	0	0	Good	LFT	2017-09-12	SO-2017.1	0
SO_C_20170719_R_0134.JPG	2017-07-19 12:41:13	58.39478611	-136.0118833	222	Random	0	0	0	0	Good	LFT	2017-09-12	SO-2017.1	0
SO_C_20170719_R_0135.JPG	2017-07-19 12:41:14	58.39475	-136.0126972	222	Random	0	0	0	0	Good	LFT	2017-09-12	SO-2017.1	0
SO_C_20170719_R_0136.JPG	2017-07-19 12:41:15	58.39471111	-136.0135083	222	Random	0	0	0	0	Good	LFT	2017-09-12	SO-2017.1	0
SO_C_20170719_R_0137.JPG	2017-07-19 12:41:16	58.39467222	-136.0143222	222	Random	0	0	0	0	Good	LFT	2017-09-12	SO-2017.1	0
SO_C_20170719_R_0138.JPG	2017-07-19 12:41:17	58.39463333	-136.0151333	222	Random	0	0	0	0	Good	LFT	2017-09-12	SO-2017.1	0
SO_C_20170719_R_0139.JPG	2017-07-19 12:41:18	58.39459444	-136.0159472	221	Random	0	0	0	0	Good	LFT	2017-09-12	SO-2017.1	0
SO_C_20170719_R_0140.JPG	2017-07-19 12:41:19	58.39455556	-136.0167583	221	Random	0	0	1	0	Good	LFT	2017-09-26	SO-2017.1	0
SO_C_20170719_R_0141.JPG	2017-07-19 12:41:20	58.39451667	-136.0175722	221	Random	0	0	0	0	Good	LFT	2017-09-12	SO-2017.1	0
SO_C_20170719_R_0142.JPG	2017-07-19 12:41:21	58.394475	-136.0183861	221	Random	0	0	0	0	Good	LFT	2017-09-12	SO-2017.1	0
SO_C_20170719_R_0143.JPG	2017-07-19 12:41:22	58.39443333	-136.0192	221	Random	0	0	0	0	Good	LFT	2017-09-12	SO-2017.1	0
SO_C_20170719_R_0144.JPG	2017-07-19 12:41:23	58.39439167	-136.0200194	218	Random	0	0	0	0	Good	LFT	2017-09-12	SO-2017.1	0
SO_C_20170719_R_0145.JPG	2017-07-19 12:41:24	58.39435	-136.0208417	217	Random	0	0	0	0	Good	LFT	2017-09-12	SO-2017.1	0
SO_C_20170719_R_0146.JPG	2017-07-19 12:41:25	58.39431111	-136.0216667	216	Random	0	0	0	0	Good	LFT	2017-09-12	SO-2017.1	0
SO_C_20170719_R_0147.JPG	2017-07-19 12:41:26	58.39426944	-136.0224917	215	Random	0	0	0	0	Good	LFT	2017-09-12	SO-2017.1	0
SO_C_20170719_R_0148.JPG	2017-07-19 12:41:27	58.39422778	-136.0233194	215	Random	0	0	0	0	Good	LFT	2017-09-12	SO-2017.1	0
SO_C_20170719_R_0149.JPG	2017-07-19 12:41:28	58.39418611	-136.0241444	214	Random	0	0	0	0	Good	LFT	2017-09-12	SO-2017.1	0
SO_C_20170719_R_0150.JPG	2017-07-19 12:41:29	58.39414444	-136.0249694	215	Random	0	0	0	0	Good	LFT	2017-09-12	SO-2017.1	0
SO_C_20170719_R_0151.JPG	2017-07-19 12:41:30	58.39410556	-136.0257889	215	Random	0	0	0	0	Good	LFT	2017-09-12	SO-2017.1	0
SO_C_20170719_R_0152.JPG	2017-07-19 12:41:31	58.39406389	-136.0266111	215	Random	0	0	0	0	Good	LFT	2017-09-12	SO-2017.1	0
SO_C_20170719_R_0153.JPG	2017-07-19 12:41:32	58.39402778	-136.0274278	217	Random	0	0	0	0	Good	LFT	2017-09-12	SO-2017.1	0
SO_C_20170719_R_0154.JPG	2017-07-19 12:41:33	58.39399167	-136.0282444	217	Random	0	0	0	0	Good	LFT	2017-09-12	SO-2017.1	0
SO_C_20170719_R_0155.JPG	2017-07-19 12:41:34	58.39396111	-136.0290583	218	Random	0	0	0	0	Good	LFT	2017-09-12	SO-2017.1	0
SO_C_20170719_R_0156.JPG	2017-07-19 12:41:35	58.39393056	-136.0298722	219	Random	0	0	0	0	Good	LFT	2017-09-12	SO-2017.1	0
SO_C_20170719_R_0157.JPG	2017-07-19 12:41:36	58.39390556	-136.0306833	220	Random	0	0	0	0	Good	LFT	2017-09-12	SO-2017.1	0
SO_C_20170719_R_0158.JPG	2017-07-19 12:41:37	58.39388056	-136.0314917	220	Random	0	0	0	0	Good	LFT	2017-09-12	SO-2017.1	0
SO_C_20170719_R_0159.JPG	2017-07-19 12:41:38	58.39385833	-136.0323	219	Random	0	0	0	0	Good	LFT	2017-09-12	SO-2017.1	0
SO_C_20170719_R_0160.JPG	2017-07-19 12:41:39	58.39383889	-136.0331083	219	Random	0	0	0	0	Good	LFT	2017-09-12	SO-2017.1	0
SO_C_20170719_R_0161.JPG	2017-07-19 12:41:40	58.393825	-136.0339194	219	Random	0	0	0	0	Good	LFT	2017-09-12	SO-2017.1	0
SO_C_20170719_R_0162.JPG	2017-07-19 12:41:41	58.39380833	-136.0347278	220	Random	0	0	0	0	Good	LFT	2017-09-12	SO-2017.1	0
SO_C_20170719_R_0163.JPG	2017-07-19 12:41:42	58.39379444	-136.0355389	220	Random	0	0	0	0	Good	LFT	2017-09-12	SO-2017.1	0
SO_C_20170719_R_0164.JPG	2017-07-19 12:41:43	58.39378056	-136.03635	220	Random	0	0	0	0	Good	LFT	2017-09-12	SO-2017.1	0
SO_C_20170719_R_0165.JPG	2017-07-19 12:41:44	58.39376667	-136.0371611	220	Random	0	0	0	0	Good	LFT	2017-09-12	SO-2017.1	0
SO_C_20170719_R_0166.JPG	2017-07-19 12:41:45	58.39375278	-136.0379722	219	Random	0	0	0	0	Good	LFT	2017-09-12	SO-2017.1	0
SO_C_20170719_R_0167.JPG	2017-07-19 12:41:46	58.39373611	-136.0387833	219	Random	0	0	1	0	Good	LFT	2017-09-12	SO-2017.1	0
SO_C_20170719_R_0168.JPG	2017-07-19 12:41:47	58.39371667	-136.0395944	219	Random	0	0	1	0	Good	LFT	2017-09-12	SO-2017.1	0
SO_C_20170719_R_0169.JPG	2017-07-19 12:41:48	58.39369444	-136.0404028	218	Random	0	0	1	0	Good	LFT	2017-09-12	SO-2017.1	0
SO_C_20170719_R_0170.JPG	2017-07-19 12:41:49	58.39366944	-136.0412111	219	Random	0	0	0	0	Good	LFT	2017-09-12	SO-2017.1	0
SO_C_20170719_R_0171.JPG	2017-07-19 12:41:50	58.39364444	-136.0420167	219	Random	0	0	0	0	Good	LFT	2017-09-12	SO-2017.1	0
SO_C_20170719_R_0172.JPG	2017-07-19 12:41:51	58.39361667	-136.0428222	219	Random	0	0	0	0	Good	LFT	2017-09-12	SO-2017.1	0
SO_C_20170719_R_0173.JPG	2017-07-19 12:41:52	58.39358889	-136.0436278	220	Random	0	0	0	0	Good	LFT	2017-09-12	SO-2017.1	0
SO_C_20170719_R_0174.JPG	2017-07-19 12:41:53	58.39356111	-136.0444306	220	Random	0	0	1	0	Good	LFT	2017-09-12	SO-2017.1	0
SO_C_20170719_R_0175.JPG	2017-07-19 12:41:54	58.39353611	-136.0452306	220	Random	0	0	1	0	Good	LFT	2017-09-12	SO-2017.1	0
SO_C_20170719_R_0176.JPG	2017-07-19 12:41:55	58.39351111	-136.0460333	220	Random	0	0	1	0	Good	LFT	2017-09-12	SO-2017.1	0
SO_C_20170719_R_0177.JPG	2017-07-19 12:41:56	58.39348889	-136.0468333	221	Random	0	0	1	0	Good	LFT	2017-09-12	SO-2017.1	0
SO_C_20170719_R_0178.JPG	2017-07-19 12:41:57	58.39346667	-136.0476306	221	Random	0	0	1	0	Good	LFT	2017-09-12	SO-2017.1	0
SO_C_20170719_R_0179.JPG	2017-07-19 12:41:58	58.39344444	-136.0484306	220	Random	0	0	1	0	Good	LFT	2017-09-12	SO-2017.1	0
SO_C_20170719_R_0180.JPG	2017-07-19 12:41:59	58.39341944	-136.0492306	221	Random	0	0	0	0	Good	LFT	2017-09-12	SO-2017.1	0
SO_C_20170719_R_0181.JPG	2017-07-19 12:42:00	58.39339722	-136.0500306	221	Random	0	0	0	0	Good	LFT	2017-09-12	SO-2017.1	0
SO_C_20170719_R_0182.JPG	2017-07-19 12:42:01	58.39337222	-136.0508278	221	Random	0	0	0	0	Good	LFT	2017-09-12	SO-2017.1	0
SO_C_20170719_R_0183.JPG	2017-07-19 12:42:02	58.39335	-136.0516278	220	Random	0	0	0	0	Good	LFT	2017-09-12	SO-2017.1	0
SO_C_20170719_R_0184.JPG	2017-07-19 12:42:03	58.39332778	-136.052425	221	Random	0	0	1	0	Good	LFT	2017-09-12	SO-2017.1	0
SO_C_20170719_R_0185.JPG	2017-07-19 12:42:04	58.39330278	-136.0532222	220	Random	0	0	1	0	Good	LFT	2017-09-12	SO-2017.1	0
SO_C_20170719_R_0186.JPG	2017-07-19 12:42:05	58.393275	-136.0540194	220	Random	0	0	0	1	Good	LFT	2017-09-12	SO-2017.1	0
SO_C_20170719_R_0187.JPG	2017-07-19 12:42:06	58.39324722	-136.0548167	220	Random	0	0	0	1	Good	LFT	2017-09-12	SO-2017.1	0
SO_C_20170719_R_0188.JPG	2017-07-19 12:42:07	58.39321667	-136.0556111	221	Random	0	0	0	1	Good	LFT	2017-09-12	SO-2017.1	0
SO_C_20170719_R_0189.JPG	2017-07-19 12:42:08	58.39318611	-136.0564083	220	Random	0	0	0	1	Good	LFT	2017-09-12	SO-2017.1	0
SO_C_20170719_R_0190.JPG	2017-07-19 12:42:09	58.39315833	-136.0572056	220	Random	0	0	0	1	Good	LFT	2017-09-12	SO-2017.1	0
SO_C_20170719_R_0191.JPG	2017-07-19 12:44:19	58.41765	-136.0749583	221	Random	0	0	0	1	Good	LFT	2017-09-12	SO-2017.1	0
SO_C_20170719_R_0192.JPG	2017-07-19 12:44:20	58.41773611	-136.0741	221	Random	0	0	0	1	Good	LFT	2017-09-12	SO-2017.1	0
SO_C_20170719_R_0193.JPG	2017-07-19 12:44:21	58.41781111	-136.0732361	220	Random	0	0	0	1	Good	LFT	2017-09-12	SO-2017.1	0
SO_C_20170719_R_0194.JPG	2017-07-19 12:44:22	58.417875	-136.0723667	219	Random	0	0	0	1	Good	LFT	2017-09-12	SO-2017.1	0
SO_C_20170719_R_0195.JPG	2017-07-19 12:44:23	58.417925	-136.0714944	219	Random	0	0	0	1	Good	LFT	2017-09-12	SO-2017.1	0
SO_C_20170719_R_0196.JPG	2017-07-19 12:44:24	58.41796667	-136.0706194	219	Random	0	0	0	1	Good	LFT	2017-09-12	SO-2017.1	0
SO_C_20170719_R_0197.JPG	2017-07-19 12:44:25	58.41799444	-136.0697389	218	Random	0	0	0	1	Good	LFT	2017-09-12	SO-2017.1	0
SO_C_20170719_R_0198.JPG	2017-07-19 12:44:26	58.41801111	-136.0688556	218	Random	0	0	0	1	Good	LFT	2017-09-12	SO-2017.1	0
SO_C_20170719_R_0199.JPG	2017-07-19 12:44:27	58.41801944	-136.0679722	216	Random	0	0	0	1	Good	LFT	2017-09-12	SO-2017.1	0
SO_C_20170719_R_0200.JPG	2017-07-19 12:44:28	58.41801111	-136.0670833	216	Random	0	0	0	1	Good	LFT	2017-09-12	SO-2017.1	0
SO_C_20170719_R_0201.JPG	2017-07-19 12:44:29	58.41799167	-136.0661944	215	Random	0	0	0	1	Good	LFT	2017-09-12	SO-2017.1	0
SO_C_20170719_R_0202.JPG	2017-07-19 12:44:30	58.41796389	-136.0653	216	Random	0	0	0	1	Good	LFT	2017-09-12	SO-2017.1	0
SO_C_20170719_R_0203.JPG	2017-07-19 12:44:31	58.41793889	-136.0644111	217	Random	0	0	0	1	Good	LFT	2017-09-12	SO-2017.1	0
SO_C_20170719_R_0204.JPG	2017-07-19 12:44:32	58.417925	-136.063525	217	Random	0	0	0	1	Good	LFT	2017-09-12	SO-2017.1	0
SO_C_20170719_R_0205.JPG	2017-07-19 12:44:33	58.41791667	-136.0626417	218	Random	0	0	0	1	Good	LFT	2017-09-12	SO-2017.1	0
SO_C_20170719_R_0206.JPG	2017-07-19 12:44:34	58.41791111	-136.0617611	218	Random	0	0	0	1	Good	LFT	2017-09-12	SO-2017.1	0
SO_C_20170719_R_0207.JPG	2017-07-19 12:44:35	58.41790556	-136.0608861	219	Random	0	0	0	1	Good	LFT	2017-09-12	SO-2017.1	0
SO_C_20170719_R_0208.JPG	2017-07-19 12:44:36	58.41789722	-136.0600139	218	Random	0	0	0	1	Good	LFT	2017-09-12	SO-2017.1	0
SO_C_20170719_R_0209.JPG	2017-07-19 12:44:37	58.41789444	-136.0591417	219	Random	0	0	0	1	Good	LFT	2017-09-12	SO-2017.1	0
SO_C_20170719_R_0210.JPG	2017-07-19 12:44:38	58.41789444	-136.0582722	217	Random	0	0	0	1	Good	LFT	2017-09-12	SO-2017.1	0
SO_C_20170719_R_0211.JPG	2017-07-19 12:44:39	58.4179	-136.0574028	217	Random	0	0	1	1	Good	LFT	2017-09-12	SO-2017.1	0
SO_C_20170719_R_0212.JPG	2017-07-19 12:44:40	58.41791389	-136.0565361	217	Random	0	0	1	1	Good	LFT	2017-09-12	SO-2017.1	0
SO_C_20170719_R_0213.JPG	2017-07-19 12:44:41	58.41793333	-136.0556694	217	Random	0	0	1	0	Good	LFT	2017-09-12	SO-2017.1	0
SO_C_20170719_R_0214.JPG	2017-07-19 12:44:42	58.41795556	-136.0548056	216	Random	0	0	1	0	Good	LFT	2017-09-12	SO-2017.1	0
SO_C_20170719_R_0215.JPG	2017-07-19 12:44:43	58.41798056	-136.0539417	216	Random	0	0	0	0	Good	LFT	2017-09-12	SO-2017.1	0
SO_C_20170719_R_0216.JPG	2017-07-19 12:44:44	58.41800556	-136.0530778	215	Random	0	0	0	0	Good	LFT	2017-09-12	SO-2017.1	0
SO_C_20170719_R_0217.JPG	2017-07-19 12:44:45	58.41803056	-136.0522139	215	Random	0	0	0	0	Good	LFT	2017-09-12	SO-2017.1	0
SO_C_20170719_R_0218.JPG	2017-07-19 12:44:46	58.41805278	-136.05135	215	Random	0	0	0	0	Good	LFT	2017-09-12	SO-2017.1	0
SO_C_20170719_R_0219.JPG	2017-07-19 12:44:47	58.418075	-136.0504861	215	Random	0	0	0	0	Good	LFT	2017-09-12	SO-2017.1	0
SO_C_20170719_R_0220.JPG	2017-07-19 12:44:48	58.41809444	-136.0496222	215	Random	0	0	0	0	Good	LFT	2017-09-12	SO-2017.1	0
SO_C_20170719_R_0221.JPG	2017-07-19 12:44:49	58.41811111	-136.0487556	215	Random	0	0	0	0	Good	LFT	2017-09-12	SO-2017.1	0
SO_C_20170719_R_0222.JPG	2017-07-19 12:44:50	58.41812778	-136.0478917	215	Random	0	0	0	0	Good	LFT	2017-09-12	SO-2017.1	0
SO_C_20170719_R_0223.JPG	2017-07-19 12:44:51	58.41813889	-136.0470306	214	Random	0	0	0	0	Good	LFT	2017-09-12	SO-2017.1	0
SO_C_20170719_R_0224.JPG	2017-07-19 12:44:52	58.41815278	-136.0461722	215	Random	0	0	0	0	Good	LFT	2017-09-12	SO-2017.1	0
SO_C_20170719_R_0225.JPG	2017-07-19 12:44:53	58.41816111	-136.0453194	215	Random	0	0	0	0	Good	LFT	2017-09-12	SO-2017.1	0
SO_C_20170719_R_0226.JPG	2017-07-19 12:44:54	58.41817222	-136.0444667	216	Random	0	0	0	0	Good	LFT	2017-09-12	SO-2017.1	0
SO_C_20170719_R_0227.JPG	2017-07-19 12:44:55	58.41818333	-136.0436222	216	Random	0	0	0	0	Good	LFT	2017-09-12	SO-2017.1	0
SO_C_20170719_R_0228.JPG	2017-07-19 12:44:56	58.41819722	-136.0427778	216	Random	0	0	0	0	Good	LFT	2017-09-12	SO-2017.1	0
SO_C_20170719_R_0229.JPG	2017-07-19 12:44:57	58.41821111	-136.0419361	217	Random	0	0	0	0	Good	LFT	2017-09-12	SO-2017.1	0
SO_C_20170719_R_0230.JPG	2017-07-19 12:44:58	58.41822778	-136.0410972	217	Random	0	0	0	0	Good	LFT	2017-09-12	SO-2017.1	0
SO_C_20170719_R_0231.JPG	2017-07-19 12:44:59	58.41824444	-136.0402611	217	Random	0	0	0	0	Good	LFT	2017-09-12	SO-2017.1	0
SO_C_20170719_R_0232.JPG	2017-07-19 12:45:00	58.41826389	-136.039425	218	Random	0	0	0	0	Good	LFT	2017-09-12	SO-2017.1	0
SO_C_20170719_R_0233.JPG	2017-07-19 12:45:01	58.41828333	-136.0385917	218	Random	0	0	0	0	Good	LFT	2017-09-12	SO-2017.1	0
SO_C_20170719_R_0234.JPG	2017-07-19 12:45:02	58.41830556	-136.0377556	218	Random	0	0	0	0	Good	LFT	2017-09-12	SO-2017.1	0
SO_C_20170719_R_0235.JPG	2017-07-19 12:45:03	58.418325	-136.0369194	219	Random	0	0	0	0	Good	LFT	2017-09-12	SO-2017.1	0
SO_C_20170719_R_0236.JPG	2017-07-19 12:45:04	58.41834444	-136.0360861	218	Random	0	0	0	0	Good	LFT	2017-09-12	SO-2017.1	0
SO_C_20170719_R_0237.JPG	2017-07-19 12:45:05	58.41836389	-136.03525	217	Random	0	0	1	0	Good	LFT	2017-09-12	SO-2017.1	0
SO_C_20170719_R_0238.JPG	2017-07-19 12:45:06	58.41838056	-136.0344111	217	Random	0	0	1	0	Good	LFT	2017-09-12	SO-2017.1	0
SO_C_20170719_R_0239.JPG	2017-07-19 12:45:07	58.41839444	-136.0335694	215	Random	0	0	1	0	Good	LFT	2017-09-12	SO-2017.1	0
SO_C_20170719_R_0240.JPG	2017-07-19 12:45:08	58.41840556	-136.032725	214	Random	0	0	1	0	Good	LFT	2017-09-12	SO-2017.1	0
SO_C_20170719_R_0241.JPG	2017-07-19 12:45:09	58.41841389	-136.0318806	213	Random	0	0	1	0	Good	LFT	2017-09-12	SO-2017.1	0
SO_C_20170719_R_0242.JPG	2017-07-19 12:45:10	58.41842222	-136.0310333	213	Random	0	0	1	0	Good	LFT	2017-09-12	SO-2017.1	0
SO_C_20170719_R_0243.JPG	2017-07-19 12:45:11	58.41842778	-136.0301917	212	Random	0	0	1	0	Good	LFT	2017-09-12	SO-2017.1	0
SO_C_20170719_R_0244.JPG	2017-07-19 12:45:12	58.41843056	-136.02935	212	Random	0	0	1	0	Good	LFT	2017-09-12	SO-2017.1	0
SO_C_20170719_R_0245.JPG	2017-07-19 12:45:13	58.41843333	-136.0285139	213	Random	0	0	0	0	Good	LFT	2017-09-12	SO-2017.1	0
SO_C_20170719_R_0246.JPG	2017-07-19 12:45:14	58.41843333	-136.0276833	214	Random	0	0	1	0	Good	LFT	2017-09-12	SO-2017.1	0
SO_C_20170719_R_0247.JPG	2017-07-19 12:45:15	58.41843333	-136.0268583	215	Random	0	0	1	0	Good	LFT	2017-09-12	SO-2017.1	0
SO_C_20170719_R_0248.JPG	2017-07-19 12:45:16	58.41843611	-136.0260361	216	Random	0	0	0	0	Good	LFT	2017-09-12	SO-2017.1	0
SO_C_20170719_R_0249.JPG	2017-07-19 12:45:17	58.41844167	-136.0252194	217	Random	0	0	0	0	Good	LFT	2017-09-12	SO-2017.1	0
SO_C_20170719_R_0250.JPG	2017-07-19 12:45:18	58.41845	-136.0244083	218	Random	0	0	0	0	Good	LFT	2017-09-12	SO-2017.1	0
SO_C_20170719_R_0251.JPG	2017-07-19 12:45:19	58.41846111	-136.0236028	219	Random	0	0	0	0	Good	LFT	2017-09-12	SO-2017.1	0
SO_C_20170719_R_0252.JPG	2017-07-19 12:45:20	58.41847778	-136.0227944	221	Random	0	0	0	0	Good	LFT	2017-09-12	SO-2017.1	0
SO_C_20170719_R_0253.JPG	2017-07-19 12:45:21	58.41849167	-136.0219861	220	Random	0	0	0	0	Good	LFT	2017-09-12	SO-2017.1	0
SO_C_20170719_R_0254.JPG	2017-07-19 12:45:22	58.41850833	-136.0211722	220	Random	0	0	0	0	Good	LFT	2017-09-12	SO-2017.1	0
SO_C_20170719_R_0255.JPG	2017-07-19 12:45:23	58.418525	-136.0203556	217	Random	0	0	0	0	Good	LFT	2017-09-12	SO-2017.1	0
SO_C_20170719_R_0256.JPG	2017-07-19 12:45:24	58.41854444	-136.0195417	216	Random	0	0	0	0	Good	LFT	2017-09-12	SO-2017.1	0
SO_C_20170719_R_0257.JPG	2017-07-19 12:45:25	58.41856389	-136.018725	214	Random	1	0	0	0	Good	LFT	2017-09-26	SO-2017.1	0
SO_C_20170719_R_0258.JPG	2017-07-19 12:45:26	58.41858333	-136.0179	214	Random	0	0	1	0	Good	LFT	2017-09-12	SO-2017.1	0
SO_C_20170719_R_0259.JPG	2017-07-19 12:45:27	58.4186	-136.017075	213	Random	0	0	1	0	Good	LFT	2017-09-12	SO-2017.1	0
SO_C_20170719_R_0260.JPG	2017-07-19 12:45:28	58.41861667	-136.0162528	213	Random	0	0	0	0	Good	LFT	2017-09-12	SO-2017.1	0
SO_C_20170719_R_0261.JPG	2017-07-19 12:45:29	58.41863056	-136.0154306	212	Random	0	0	0	0	Good	LFT	2017-09-12	SO-2017.1	0
SO_C_20170719_R_0262.JPG	2017-07-19 12:45:30	58.41865	-136.0146111	212	Random	0	0	1	0	Good	LFT	2017-09-12	SO-2017.1	0
SO_C_20170719_R_0263.JPG	2017-07-19 12:45:31	58.41866667	-136.0137944	212	Random	0	0	0	0	Good	LFT	2017-09-12	SO-2017.1	0
SO_C_20170719_R_0264.JPG	2017-07-19 12:45:32	58.41868333	-136.0129806	212	Random	0	0	0	0	Good	LFT	2017-09-12	SO-2017.1	0
SO_C_20170719_R_0265.JPG	2017-07-19 12:45:33	58.41869722	-136.0121694	213	Random	0	0	0	0	Good	LFT	2017-09-12	SO-2017.1	0
SO_C_20170719_R_0266.JPG	2017-07-19 12:45:34	58.41871111	-136.0113611	213	Random	0	0	0	0	Good	LFT	2017-09-12	SO-2017.1	0
SO_C_20170719_R_0267.JPG	2017-07-19 12:45:35	58.418725	-136.0105583	214	Random	0	0	0	0	Good	LFT	2017-09-12	SO-2017.1	0
SO_C_20170719_R_0268.JPG	2017-07-19 12:45:36	58.41874444	-136.0097583	214	Random	0	0	0	0	Good	LFT	2017-09-12	SO-2017.1	0
SO_C_20170719_R_0269.JPG	2017-07-19 12:45:37	58.41876389	-136.0089583	214	Random	0	0	0	0	Good	LFT	2017-09-12	SO-2017.1	0
SO_C_20170719_R_0270.JPG	2017-07-19 12:45:38	58.41878889	-136.0081583	213	Random	0	0	0	0	Good	LFT	2017-09-12	SO-2017.1	0
SO_C_20170719_R_0271.JPG	2017-07-19 12:45:39	58.41881389	-136.0073556	213	Random	0	0	0	0	Good	LFT	2017-09-12	SO-2017.1	0
SO_C_20170719_R_0272.JPG	2017-07-19 12:45:40	58.41883611	-136.0065528	213	Random	0	0	1	0	Good	LFT	2017-09-12	SO-2017.1	0
SO_C_20170719_R_0273.JPG	2017-07-19 12:45:41	58.41886389	-136.0057472	213	Random	0	0	1	0	Good	LFT	2017-09-12	SO-2017.1	0
SO_C_20170719_R_0274.JPG	2017-07-19 12:45:42	58.41888889	-136.0049417	212	Random	0	0	1	0	Good	LFT	2017-09-12	SO-2017.1	0
SO_C_20170719_R_0275.JPG	2017-07-19 12:45:43	58.41891111	-136.0041333	211	Random	0	0	1	0	Good	LFT	2017-09-12	SO-2017.1	0
SO_C_20170719_R_0276.JPG	2017-07-19 12:45:44	58.41892778	-136.003325	211	Random	0	0	0	0	Good	LFT	2017-09-12	SO-2017.1	0
SO_C_20170719_R_0277.JPG	2017-07-19 12:45:45	58.41894722	-136.0025139	210	Random	0	0	0	0	Good	LFT	2017-09-12	SO-2017.1	0
SO_C_20170719_R_0278.JPG	2017-07-19 12:45:46	58.41896389	-136.0017028	209	Random	0	0	0	0	Good	LFT	2017-09-12	SO-2017.1	0
SO_C_20170719_R_0279.JPG	2017-07-19 12:45:47	58.418975	-136.0008944	209	Random	0	0	0	0	Good	LFT	2017-09-12	SO-2017.1	0
SO_C_20170719_R_0280.JPG	2017-07-19 12:45:48	58.41898611	-136.0000861	211	Random	0	0	0	0	Good	LFT	2017-09-12	SO-2017.1	0
SO_C_20170719_R_0281.JPG	2017-07-19 12:45:49	58.41899444	-135.9992861	211	Random	0	0	0	0	Good	LFT	2017-09-12	SO-2017.1	0
SO_C_20170719_R_0282.JPG	2017-07-19 12:45:50	58.41899722	-135.9984917	212	Random	0	0	0	0	Good	LFT	2017-09-12	SO-2017.1	0
SO_C_20170719_R_0283.JPG	2017-07-19 12:45:51	58.41899722	-135.9976972	213	Random	0	0	0	0	Good	LFT	2017-09-12	SO-2017.1	0
SO_C_20170719_R_0284.JPG	2017-07-19 12:45:52	58.41899722	-135.9969111	214	Random	0	0	0	0	Good	LFT	2017-09-12	SO-2017.1	0
SO_C_20170719_R_0285.JPG	2017-07-19 12:45:53	58.41899444	-135.996125	214	Random	0	0	0	0	Good	LFT	2017-09-12	SO-2017.1	0
SO_C_20170719_R_0286.JPG	2017-07-19 12:45:54	58.41899167	-135.9953444	215	Random	0	0	0	0	Good	LFT	2017-09-12	SO-2017.1	0
SO_C_20170719_R_0287.JPG	2017-07-19 12:45:55	58.41899444	-135.9945667	216	Random	0	0	0	0	Good	LFT	2017-09-12	SO-2017.1	0
SO_C_20170719_R_0288.JPG	2017-07-19 12:45:56	58.41899722	-135.9937917	216	Random	0	0	0	0	Good	LFT	2017-09-12	SO-2017.1	0
SO_C_20170719_R_0289.JPG	2017-07-19 12:45:57	58.41900278	-135.9930167	216	Random	0	0	0	0	Good	LFT	2017-09-12	SO-2017.1	0
SO_C_20170719_R_0290.JPG	2017-07-19 12:45:58	58.41900833	-135.9922444	216	Random	0	0	0	0	Good	LFT	2017-09-12	SO-2017.1	0
SO_C_20170719_R_0291.JPG	2017-07-19 12:45:59	58.41901389	-135.9914667	216	Random	0	0	0	0	Good	LFT	2017-09-12	SO-2017.1	0
SO_C_20170719_R_0292.JPG	2017-07-19 12:46:00	58.41901944	-135.9906833	215	Random	0	0	0	0	Good	LFT	2017-09-12	SO-2017.1	0
SO_C_20170719_R_0293.JPG	2017-07-19 12:46:01	58.419025	-135.9899	215	Random	0	0	0	0	Good	LFT	2017-09-12	SO-2017.1	0
SO_C_20170719_R_0294.JPG	2017-07-19 12:46:02	58.41902778	-135.9891139	215	Random	0	0	0	0	Good	LFT	2017-09-12	SO-2017.1	0
SO_C_20170719_R_0295.JPG	2017-07-19 12:46:03	58.41902778	-135.988325	215	Random	0	0	0	0	Good	LFT	2017-09-12	SO-2017.1	0
SO_C_20170719_R_0296.JPG	2017-07-19 12:46:04	58.41902778	-135.9875361	214	Random	0	0	0	0	Good	LFT	2017-09-12	SO-2017.1	0
SO_C_20170719_R_0297.JPG	2017-07-19 12:46:05	58.41902778	-135.9867444	215	Random	0	0	0	0	Good	LFT	2017-09-12	SO-2017.1	0
SO_C_20170719_R_0298.JPG	2017-07-19 12:46:06	58.41902778	-135.9859528	215	Random	0	0	0	0	Good	LFT	2017-09-12	SO-2017.1	0
SO_C_20170719_R_0299.JPG	2017-07-19 12:46:07	58.41902778	-135.9851639	215	Random	0	0	0	0	Good	LFT	2017-09-12	SO-2017.1	0
SO_C_20170719_R_0300.JPG	2017-07-19 12:46:08	58.41902778	-135.984375	216	Random	0	0	0	0	Good	LFT	2017-09-12	SO-2017.1	0
SO_C_20170719_R_0301.JPG	2017-07-19 12:46:09	58.41902778	-135.9835889	217	Random	0	0	0	0	Good	LFT	2017-09-12	SO-2017.1	0
SO_C_20170719_R_0302.JPG	2017-07-19 12:46:10	58.419025	-135.9828028	218	Random	0	0	0	0	Good	LFT	2017-09-12	SO-2017.1	0
SO_C_20170719_R_0303.JPG	2017-07-19 12:46:11	58.419025	-135.9820167	219	Random	0	0	0	0	Good	LFT	2017-09-12	SO-2017.1	0
SO_C_20170719_R_0304.JPG	2017-07-19 12:46:12	58.41902222	-135.9812333	220	Random	0	0	0	0	Good	LFT	2017-09-12	SO-2017.1	0
SO_C_20170719_R_0305.JPG	2017-07-19 12:46:13	58.419025	-135.9804444	221	Random	0	0	0	0	Good	LFT	2017-09-12	SO-2017.1	0
SO_C_20170719_R_0306.JPG	2017-07-19 12:46:14	58.41902222	-135.9796556	220	Random	0	0	0	0	Good	LFT	2017-09-12	SO-2017.1	0
SO_C_20170719_R_0307.JPG	2017-07-19 12:46:15	58.41901944	-135.9788639	219	Random	0	0	0	0	Good	LFT	2017-09-12	SO-2017.1	0
SO_C_20170719_R_0308.JPG	2017-07-19 12:46:16	58.41901667	-135.9780694	219	Random	0	0	0	0	Good	LFT	2017-09-12	SO-2017.1	0
SO_C_20170719_R_0309.JPG	2017-07-19 12:46:17	58.41901111	-135.9772722	219	Random	0	0	0	0	Good	LFT	2017-09-12	SO-2017.1	0
SO_C_20170719_R_0310.JPG	2017-07-19 12:46:18	58.41900556	-135.9764694	218	Random	0	0	0	0	Good	LFT	2017-09-12	SO-2017.1	0
SO_C_20170719_R_0311.JPG	2017-07-19 12:46:19	58.419	-135.9756639	218	Random	0	0	0	0	Good	LFT	2017-09-12	SO-2017.1	0
SO_C_20170719_R_0312.JPG	2017-07-19 12:46:20	58.41899444	-135.9748556	218	Random	0	0	0	0	Good	LFT	2017-09-12	SO-2017.1	0
SO_C_20170719_R_0313.JPG	2017-07-19 12:46:21	58.41898889	-135.9740472	218	Random	0	0	0	0	Good	LFT	2017-09-12	SO-2017.1	0
SO_C_20170719_R_0314.JPG	2017-07-19 12:46:22	58.41898333	-135.9732361	220	Random	0	0	0	0	Good	LFT	2017-09-12	SO-2017.1	0
SO_C_20170719_R_0315.JPG	2017-07-19 12:46:23	58.418975	-135.972425	219	Random	0	0	0	0	Good	LFT	2017-09-12	SO-2017.1	0
SO_C_20170719_R_0316.JPG	2017-07-19 12:46:24	58.41896667	-135.9716167	220	Random	0	0	0	0	Good	LFT	2017-09-12	SO-2017.1	0
SO_C_20170719_R_0317.JPG	2017-07-19 12:46:25	58.41895556	-135.9708083	221	Random	0	0	0	0	Good	LFT	2017-09-12	SO-2017.1	0
SO_C_20170719_R_0318.JPG	2017-07-19 12:46:26	58.41895	-135.97	222	Random	0	0	0	0	Good	LFT	2017-09-12	SO-2017.1	0
SO_C_20170719_R_0319.JPG	2017-07-19 12:46:27	58.41894167	-135.9691944	224	Random	0	0	0	0	Good	LFT	2017-09-12	SO-2017.1	0
SO_C_20170719_R_0320.JPG	2017-07-19 12:46:28	58.41893333	-135.9683889	224	Random	0	0	0	0	Good	LFT	2017-09-12	SO-2017.1	0
SO_C_20170719_R_0321.JPG	2017-07-19 12:46:29	58.41892778	-135.9675861	225	Random	0	0	0	0	Good	LFT	2017-09-12	SO-2017.1	0
SO_C_20170719_R_0322.JPG	2017-07-19 12:46:30	58.41892222	-135.9667861	227	Random	0	0	0	0	Good	LFT	2017-09-12	SO-2017.1	0
SO_C_20170719_R_0323.JPG	2017-07-19 12:46:31	58.41891944	-135.9659833	227	Random	0	0	0	0	Good	LFT	2017-09-12	SO-2017.1	0
SO_C_20170719_R_0324.JPG	2017-07-19 12:46:32	58.41891944	-135.965175	227	Random	0	0	0	0	Good	LFT	2017-09-12	SO-2017.1	0
SO_C_20170719_R_0325.JPG	2017-07-19 12:46:33	58.41891944	-135.9643611	227	Random	0	0	0	0	Good	LFT	2017-09-12	SO-2017.1	0
SO_C_20170719_R_0326.JPG	2017-07-19 12:46:34	58.41892222	-135.9635417	226	Random	0	0	0	0	Good	LFT	2017-09-12	SO-2017.1	0
SO_C_20170719_R_0327.JPG	2017-07-19 12:46:35	58.41892222	-135.9627167	225	Random	0	0	0	0	Good	LFT	2017-09-12	SO-2017.1	0
SO_C_20170719_R_0328.JPG	2017-07-19 12:46:36	58.418925	-135.9618861	224	Random	0	0	0	0	Good	LFT	2017-09-12	SO-2017.1	0
SO_C_20170719_R_0329.JPG	2017-07-19 12:46:37	58.41892778	-135.96105	223	Random	0	0	0	0	Good	LFT	2017-09-12	SO-2017.1	0
SO_C_20170719_R_0330.JPG	2017-07-19 12:46:38	58.41893333	-135.9602083	223	Random	0	0	0	0	Good	LFT	2017-09-12	SO-2017.1	0
SO_C_20170719_R_0331.JPG	2017-07-19 12:46:39	58.41893611	-135.9593667	222	Random	0	0	0	0	Good	LFT	2017-09-12	SO-2017.1	0
SO_C_20170719_R_0332.JPG	2017-07-19 12:46:40	58.41893889	-135.958525	223	Random	0	0	0	0	Good	LFT	2017-09-12	SO-2017.1	0
SO_C_20170719_R_0333.JPG	2017-07-19 12:46:41	58.41894444	-135.9576833	224	Random	0	0	0	0	Good	LFT	2017-09-12	SO-2017.1	0
SO_C_20170719_R_0334.JPG	2017-07-19 12:46:42	58.41895278	-135.9568444	224	Random	0	0	0	0	Good	LFT	2017-09-12	SO-2017.1	0
SO_C_20170719_R_0335.JPG	2017-07-19 12:46:43	58.41895556	-135.9560083	226	Random	0	0	0	0	Good	LFT	2017-09-12	SO-2017.1	0
SO_C_20170719_R_0336.JPG	2017-07-19 12:46:44	58.41895833	-135.955175	226	Random	0	0	0	0	Good	LFT	2017-09-12	SO-2017.1	0
SO_C_20170719_R_0337.JPG	2017-07-19 12:46:45	58.41895833	-135.9543444	227	Random	0	0	0	0	Good	LFT	2017-09-12	SO-2017.1	0
SO_C_20170719_R_0338.JPG	2017-07-19 12:46:46	58.41896111	-135.9535139	228	Random	0	0	0	0	Good	LFT	2017-09-12	SO-2017.1	0
SO_C_20170719_R_0339.JPG	2017-07-19 12:46:47	58.41896667	-135.9526806	228	Random	0	0	0	0	Good	LFT	2017-09-12	SO-2017.1	0
SO_C_20170719_R_0340.JPG	2017-07-19 12:46:48	58.41897222	-135.9518472	228	Random	0	0	0	0	Good	LFT	2017-09-12	SO-2017.1	0
SO_C_20170719_R_0341.JPG	2017-07-19 12:46:49	58.41898333	-135.9510083	227	Random	0	0	0	0	Good	LFT	2017-09-12	SO-2017.1	0
SO_C_20170719_R_0342.JPG	2017-07-19 12:46:50	58.41899167	-135.9501667	227	Random	0	0	0	0	Good	LFT	2017-09-12	SO-2017.1	0
SO_C_20170719_R_0343.JPG	2017-07-19 12:46:51	58.41899722	-135.9493167	226	Random	0	0	0	0	Good	LFT	2017-09-12	SO-2017.1	0
SO_C_20170719_R_0344.JPG	2017-07-19 12:46:52	58.41900556	-135.9484639	225	Random	0	0	0	0	Good	LFT	2017-09-12	SO-2017.1	0
SO_C_20170719_R_0345.JPG	2017-07-19 12:46:53	58.41901111	-135.9476056	223	Random	0	0	0	0	Good	LFT	2017-09-12	SO-2017.1	0
SO_C_20170719_R_0346.JPG	2017-07-19 12:46:54	58.41901667	-135.9467417	222	Random	0	0	1	0	Good	LFT	2017-09-12	SO-2017.1	0
SO_C_20170719_R_0347.JPG	2017-07-19 12:46:55	58.41901667	-135.945875	221	Random	0	0	0	0	Good	LFT	2017-09-12	SO-2017.1	0
SO_C_20170719_R_0348.JPG	2017-07-19 12:46:56	58.41901389	-135.9450028	220	Random	0	0	0	0	Good	LFT	2017-09-12	SO-2017.1	0
SO_C_20170719_R_0349.JPG	2017-07-19 12:46:57	58.41901111	-135.9441333	219	Random	0	0	0	0	Good	LFT	2017-09-12	SO-2017.1	0
SO_C_20170719_R_0350.JPG	2017-07-19 12:46:58	58.41900556	-135.9432611	218	Random	0	0	0	0	Good	LFT	2017-09-12	SO-2017.1	0
SO_C_20170719_R_0351.JPG	2017-07-19 12:46:59	58.419	-135.9423917	218	Random	0	0	0	0	Good	LFT	2017-09-12	SO-2017.1	0
SO_C_20170719_R_0352.JPG	2017-07-19 12:47:00	58.41899722	-135.941525	219	Random	0	0	0	0	Good	LFT	2017-09-12	SO-2017.1	0
SO_C_20170719_R_0353.JPG	2017-07-19 12:47:01	58.41899444	-135.9406611	220	Random	0	0	0	0	Good	LFT	2017-09-12	SO-2017.1	0
SO_C_20170719_R_0354.JPG	2017-07-19 12:47:02	58.41899167	-135.9398028	222	Random	0	0	0	0	Good	LFT	2017-09-12	SO-2017.1	0
SO_C_20170719_R_0355.JPG	2017-07-19 12:47:03	58.41899167	-135.9389472	222	Random	0	0	0	0	Good	LFT	2017-09-12	SO-2017.1	0
SO_C_20170719_R_0356.JPG	2017-07-19 12:47:04	58.41899167	-135.9380944	223	Random	0	0	0	0	Good	LFT	2017-09-12	SO-2017.1	0
SO_C_20170719_R_0357.JPG	2017-07-19 12:47:05	58.41899167	-135.9372444	224	Random	0	0	0	0	Good	LFT	2017-09-12	SO-2017.1	0
SO_C_20170719_R_0358.JPG	2017-07-19 12:47:06	58.41899444	-135.9363944	226	Random	0	0	0	0	Good	LFT	2017-09-12	SO-2017.1	0
SO_C_20170719_R_0359.JPG	2017-07-19 12:47:07	58.41900556	-135.93555	225	Random	0	0	0	0	Good	LFT	2017-09-12	SO-2017.1	0
SO_C_20170719_R_0360.JPG	2017-07-19 12:47:08	58.41901667	-135.9347	226	Random	0	0	0	0	Good	LFT	2017-09-12	SO-2017.1	0
SO_C_20170719_R_0361.JPG	2017-07-19 12:47:09	58.41903056	-135.9338472	225	Random	0	0	0	0	Good	LFT	2017-09-12	SO-2017.1	0
SO_C_20170719_R_0362.JPG	2017-07-19 12:47:10	58.41905	-135.9329889	224	Random	0	0	0	0	Good	LFT	2017-09-12	SO-2017.1	0
SO_C_20170719_R_0363.JPG	2017-07-19 12:47:11	58.41907222	-135.9321278	224	Random	0	0	0	0	Good	LFT	2017-09-12	SO-2017.1	0
SO_C_20170719_R_0364.JPG	2017-07-19 12:47:12	58.41909444	-135.9312639	223	Random	0	0	0	0	Good	LFT	2017-09-12	SO-2017.1	0
SO_C_20170719_R_0365.JPG	2017-07-19 12:47:13	58.41911667	-135.9303972	222	Random	0	0	0	0	Good	LFT	2017-09-12	SO-2017.1	0
SO_C_20170719_R_0366.JPG	2017-07-19 12:47:14	58.41913889	-135.929525	222	Random	0	0	0	0	Good	LFT	2017-09-12	SO-2017.1	0
SO_C_20170719_R_0367.JPG	2017-07-19 12:47:15	58.41915556	-135.9286528	222	Random	0	0	0	0	Good	LFT	2017-09-12	SO-2017.1	0
SO_C_20170719_R_0368.JPG	2017-07-19 12:47:16	58.41916944	-135.9277778	221	Random	0	0	0	0	Good	LFT	2017-09-12	SO-2017.1	0
SO_C_20170719_R_0369.JPG	2017-07-19 12:47:17	58.41918333	-135.9269028	220	Random	0	0	0	0	Good	LFT	2017-09-12	SO-2017.1	0
SO_C_20170719_R_0370.JPG	2017-07-19 12:47:18	58.41919722	-135.9260306	219	Random	0	0	0	0	Good	LFT	2017-09-12	SO-2017.1	0
SO_C_20170719_R_0371.JPG	2017-07-19 12:47:19	58.41920833	-135.9251556	219	Random	0	0	0	0	Good	LFT	2017-09-12	SO-2017.1	0
SO_C_20170719_R_0372.JPG	2017-07-19 12:47:20	58.41921389	-135.9242861	219	Random	0	0	0	0	Good	LFT	2017-09-12	SO-2017.1	0
SO_C_20170719_R_0373.JPG	2017-07-19 12:47:21	58.41922222	-135.9234167	218	Random	0	0	0	0	Good	LFT	2017-09-12	SO-2017.1	0
SO_C_20170719_R_0374.JPG	2017-07-19 12:47:22	58.41922778	-135.9225528	217	Random	0	0	0	0	Good	LFT	2017-09-12	SO-2017.1	0
SO_C_20170719_R_0375.JPG	2017-07-19 12:47:23	58.41923611	-135.9216889	218	Random	0	0	0	0	Good	LFT	2017-09-12	SO-2017.1	0
SO_C_20170719_R_0376.JPG	2017-07-19 12:47:24	58.41924722	-135.9208333	218	Random	0	0	1	0	Good	LFT	2017-09-12	SO-2017.1	0
SO_C_20170719_R_0377.JPG	2017-07-19 12:47:25	58.41925833	-135.9199806	218	Random	0	0	1	0	Good	LFT	2017-09-12	SO-2017.1	0
SO_C_20170719_R_0378.JPG	2017-07-19 12:47:26	58.41926944	-135.9191306	219	Random	0	0	0	0	Good	LFT	2017-09-12	SO-2017.1	0
SO_C_20170719_R_0379.JPG	2017-07-19 12:47:27	58.41928056	-135.9182861	219	Random	0	0	0	0	Good	LFT	2017-09-12	SO-2017.1	0
SO_C_20170719_R_0380.JPG	2017-07-19 12:47:28	58.41929444	-135.9174444	220	Random	0	0	0	0	Good	LFT	2017-09-12	SO-2017.1	0
SO_C_20170719_R_0381.JPG	2017-07-19 12:47:29	58.41930833	-135.9166083	221	Random	0	0	0	0	Good	LFT	2017-09-12	SO-2017.1	0
SO_C_20170719_R_0382.JPG	2017-07-19 12:47:30	58.419325	-135.915775	220	Random	0	0	0	0	Good	LFT	2017-09-12	SO-2017.1	0
SO_C_20170719_R_0383.JPG	2017-07-19 12:47:31	58.41934444	-135.9149444	221	Random	0	0	1	0	Good	LFT	2017-09-12	SO-2017.1	0
SO_C_20170719_R_0384.JPG	2017-07-19 12:47:32	58.41936389	-135.9141167	221	Random	0	0	0	0	Good	LFT	2017-09-12	SO-2017.1	0
SO_C_20170719_R_0385.JPG	2017-07-19 12:47:33	58.41938333	-135.9132889	221	Random	0	0	0	0	Good	LFT	2017-09-12	SO-2017.1	0
SO_C_20170719_R_0386.JPG	2017-07-19 12:47:34	58.41940278	-135.9124611	221	Random	0	0	0	0	Good	LFT	2017-09-12	SO-2017.1	0
SO_C_20170719_R_0387.JPG	2017-07-19 12:47:35	58.419425	-135.9116333	221	Random	0	0	0	0	Good	LFT	2017-09-12	SO-2017.1	0
SO_C_20170719_R_0388.JPG	2017-07-19 12:47:36	58.41944722	-135.9108028	220	Random	0	0	0	0	Good	LFT	2017-09-12	SO-2017.1	0
SO_C_20170719_R_0389.JPG	2017-07-19 12:47:37	58.41946667	-135.9099722	219	Random	0	0	1	0	Good	LFT	2017-09-12	SO-2017.1	0
SO_C_20170719_R_0390.JPG	2017-07-19 12:47:38	58.41948611	-135.9091389	219	Random	0	0	1	0	Good	LFT	2017-09-12	SO-2017.1	0
SO_C_20170719_R_0391.JPG	2017-07-19 12:47:39	58.41950278	-135.9083056	218	Random	0	0	1	0	Good	LFT	2017-09-12	SO-2017.1	0
SO_C_20170719_R_0392.JPG	2017-07-19 12:47:40	58.41951389	-135.9074694	218	Random	0	0	1	0	Good	LFT	2017-09-12	SO-2017.1	0
SO_C_20170719_R_0393.JPG	2017-07-19 12:47:41	58.419525	-135.9066333	217	Random	0	0	1	0	Good	LFT	2017-09-12	SO-2017.1	0
SO_C_20170719_R_0394.JPG	2017-07-19 12:47:42	58.41953333	-135.9058	217	Random	0	0	1	0	Good	LFT	2017-09-12	SO-2017.1	0
SO_C_20170719_R_0395.JPG	2017-07-19 12:47:43	58.41953889	-135.9049667	216	Random	0	0	1	0	Good	LFT	2017-09-12	SO-2017.1	0
SO_C_20170719_R_0396.JPG	2017-07-19 12:47:44	58.41954167	-135.9041333	216	Random	0	0	1	0	Good	LFT	2017-09-12	SO-2017.1	0
SO_C_20170719_R_0397.JPG	2017-07-19 12:47:45	58.41954167	-135.9033056	215	Random	0	0	0	0	Good	LFT	2017-09-12	SO-2017.1	0
SO_C_20170719_R_0398.JPG	2017-07-19 12:47:46	58.41953889	-135.9024778	215	Random	0	0	0	0	Good	LFT	2017-09-12	SO-2017.1	0
SO_C_20170719_R_0399.JPG	2017-07-19 12:47:47	58.41953611	-135.9016528	215	Random	0	0	0	1	Good	LFT	2017-09-12	SO-2017.1	0
SO_C_20170719_R_0400.JPG	2017-07-19 12:47:48	58.41952778	-135.9008306	216	Random	0	0	0	1	Good	LFT	2017-09-12	SO-2017.1	0
SO_C_20170719_R_0401.JPG	2017-07-19 12:47:49	58.41951944	-135.9000111	218	Random	0	0	0	1	Good	LFT	2017-09-13	SO-2017.1	0
SO_C_20170719_R_0402.JPG	2017-07-19 12:47:50	58.41951111	-135.8991944	218	Random	0	0	0	1	Good	LFT	2017-09-13	SO-2017.1	0
SO_C_20170719_R_0403.JPG	2017-07-19 12:47:51	58.41950278	-135.8983833	219	Random	0	0	0	1	Good	LFT	2017-09-13	SO-2017.1	0
SO_C_20170719_R_0404.JPG	2017-07-19 12:47:52	58.41949444	-135.8975722	219	Random	0	0	0	1	Good	LFT	2017-09-13	SO-2017.1	0
SO_C_20170719_R_0405.JPG	2017-07-19 12:50:12	58.42268056	-135.8832722	218	Random	0	0	0	1	Good	LFT	2017-09-13	SO-2017.1	0
SO_C_20170719_R_0406.JPG	2017-07-19 12:50:13	58.42271667	-135.8840917	217	Random	0	0	0	1	Good	LFT	2017-09-13	SO-2017.1	0
SO_C_20170719_R_0407.JPG	2017-07-19 12:50:14	58.42275	-135.8849111	217	Random	0	0	0	1	Good	LFT	2017-09-13	SO-2017.1	0
SO_C_20170719_R_0408.JPG	2017-07-19 12:50:15	58.42278056	-135.8857306	216	Random	0	0	0	1	Good	LFT	2017-09-13	SO-2017.1	0
SO_C_20170719_R_0409.JPG	2017-07-19 12:50:16	58.42280833	-135.88655	216	Random	0	0	0	1	Good	LFT	2017-09-13	SO-2017.1	0
SO_C_20170719_R_0410.JPG	2017-07-19 12:50:17	58.42283611	-135.8873639	217	Random	0	0	0	1	Good	LFT	2017-09-13	SO-2017.1	0
SO_C_20170719_R_0411.JPG	2017-07-19 12:50:18	58.42286389	-135.8881778	217	Random	0	0	0	1	Good	LFT	2017-09-13	SO-2017.1	0
SO_C_20170719_R_0412.JPG	2017-07-19 12:50:19	58.42288889	-135.8889861	218	Random	0	0	0	1	Good	LFT	2017-09-13	SO-2017.1	0
SO_C_20170719_R_0413.JPG	2017-07-19 12:50:20	58.42291389	-135.8897889	219	Random	0	0	0	1	Good	LFT	2017-09-13	SO-2017.1	0
SO_C_20170719_R_0414.JPG	2017-07-19 12:50:21	58.42293333	-135.8905889	219	Random	0	0	0	1	Good	LFT	2017-09-13	SO-2017.1	0
SO_C_20170719_R_0415.JPG	2017-07-19 12:50:22	58.42294722	-135.8913889	220	Random	0	0	0	1	Good	LFT	2017-09-13	SO-2017.1	0
SO_C_20170719_R_0416.JPG	2017-07-19 12:50:23	58.42296111	-135.8921861	221	Random	0	0	0	1	Good	LFT	2017-09-13	SO-2017.1	0
SO_C_20170719_R_0417.JPG	2017-07-19 12:50:24	58.42297222	-135.8929861	221	Random	0	0	0	1	Good	LFT	2017-09-13	SO-2017.1	0
SO_C_20170719_R_0418.JPG	2017-07-19 12:50:25	58.42298333	-135.8937861	220	Random	0	0	0	1	Good	LFT	2017-09-13	SO-2017.1	0
SO_C_20170719_R_0419.JPG	2017-07-19 12:50:26	58.42299167	-135.8945917	220	Random	0	0	0	1	Good	LFT	2017-09-13	SO-2017.1	0
SO_C_20170719_R_0420.JPG	2017-07-19 12:50:27	58.42299722	-135.8954	219	Random	0	0	0	1	Good	LFT	2017-09-13	SO-2017.1	0
SO_C_20170719_R_0421.JPG	2017-07-19 12:50:28	58.42300278	-135.8962139	218	Random	0	0	0	1	Good	LFT	2017-09-13	SO-2017.1	0
SO_C_20170719_R_0422.JPG	2017-07-19 12:50:29	58.42300556	-135.8970333	217	Random	0	0	0	1	Good	LFT	2017-09-13	SO-2017.1	0
SO_C_20170719_R_0423.JPG	2017-07-19 12:50:30	58.42300833	-135.8978556	216	Random	0	0	0	1	Good	LFT	2017-09-13	SO-2017.1	0
SO_C_20170719_R_0424.JPG	2017-07-19 12:50:31	58.42301111	-135.8986806	215	Random	0	0	0	1	Good	LFT	2017-09-13	SO-2017.1	0
SO_C_20170719_R_0425.JPG	2017-07-19 12:50:32	58.42300833	-135.8995083	216	Random	0	0	0	1	Good	LFT	2017-09-13	SO-2017.1	0
SO_C_20170719_R_0426.JPG	2017-07-19 12:50:33	58.42300556	-135.9003361	215	Random	0	0	0	1	Good	LFT	2017-09-13	SO-2017.1	0
SO_C_20170719_R_0427.JPG	2017-07-19 12:50:34	58.423	-135.9011639	216	Random	0	0	0	1	Good	LFT	2017-09-13	SO-2017.1	0
SO_C_20170719_R_0428.JPG	2017-07-19 12:50:35	58.42299444	-135.9019889	217	Random	0	0	0	1	Good	LFT	2017-09-13	SO-2017.1	0
SO_C_20170719_R_0429.JPG	2017-07-19 12:50:36	58.42298611	-135.9028111	218	Random	0	0	0	1	Good	LFT	2017-09-13	SO-2017.1	0
SO_C_20170719_R_0430.JPG	2017-07-19 12:50:37	58.422975	-135.9036278	219	Random	0	0	0	1	Good	LFT	2017-09-13	SO-2017.1	0
SO_C_20170719_R_0431.JPG	2017-07-19 12:50:38	58.42296389	-135.9044444	220	Random	0	0	1	0	Good	LFT	2017-09-13	SO-2017.1	0
SO_C_20170719_R_0432.JPG	2017-07-19 12:50:39	58.42295278	-135.9052556	221	Random	0	0	1	0	Good	LFT	2017-09-13	SO-2017.1	0
SO_C_20170719_R_0433.JPG	2017-07-19 12:50:40	58.42293889	-135.9060694	222	Random	0	0	1	0	Good	LFT	2017-09-13	SO-2017.1	0
SO_C_20170719_R_0434.JPG	2017-07-19 12:50:41	58.42292778	-135.9068806	222	Random	0	0	1	0	Good	LFT	2017-09-13	SO-2017.1	0
SO_C_20170719_R_0435.JPG	2017-07-19 12:50:42	58.42291944	-135.9076972	222	Random	0	0	1	0	Good	LFT	2017-09-13	SO-2017.1	0
SO_C_20170719_R_0436.JPG	2017-07-19 12:50:43	58.42291389	-135.9085167	222	Random	0	0	1	0	Good	LFT	2017-09-13	SO-2017.1	0
SO_C_20170719_R_0437.JPG	2017-07-19 12:50:44	58.42290833	-135.9093389	222	Random	0	0	0	0	Good	LFT	2017-09-13	SO-2017.1	0
SO_C_20170719_R_0438.JPG	2017-07-19 12:50:45	58.42290278	-135.9101639	220	Random	0	0	0	0	Good	LFT	2017-09-13	SO-2017.1	0
SO_C_20170719_R_0439.JPG	2017-07-19 12:50:46	58.4229	-135.9109917	220	Random	0	0	0	0	Good	LFT	2017-09-13	SO-2017.1	0
SO_C_20170719_R_0440.JPG	2017-07-19 12:50:47	58.4229	-135.911825	220	Random	0	0	0	0	Good	LFT	2017-09-13	SO-2017.1	0
SO_C_20170719_R_0441.JPG	2017-07-19 12:50:48	58.42290278	-135.9126583	219	Random	0	0	0	0	Good	LFT	2017-09-13	SO-2017.1	0
SO_C_20170719_R_0442.JPG	2017-07-19 12:50:49	58.42290278	-135.9134944	219	Random	0	0	0	0	Good	LFT	2017-09-13	SO-2017.1	0
SO_C_20170719_R_0443.JPG	2017-07-19 12:50:50	58.42290556	-135.9143306	218	Random	0	0	0	0	Good	LFT	2017-09-13	SO-2017.1	0
SO_C_20170719_R_0444.JPG	2017-07-19 12:50:51	58.42290278	-135.9151639	218	Random	0	0	0	0	Good	LFT	2017-09-13	SO-2017.1	0
SO_C_20170719_R_0445.JPG	2017-07-19 12:50:52	58.4229	-135.9159944	219	Random	0	0	0	0	Good	LFT	2017-09-13	SO-2017.1	0
SO_C_20170719_R_0446.JPG	2017-07-19 12:50:53	58.42289722	-135.916825	220	Random	0	0	0	0	Good	LFT	2017-09-13	SO-2017.1	0
SO_C_20170719_R_0447.JPG	2017-07-19 12:50:54	58.42289444	-135.91765	220	Random	0	0	0	0	Good	LFT	2017-09-13	SO-2017.1	0
SO_C_20170719_R_0448.JPG	2017-07-19 12:50:55	58.42289444	-135.918475	221	Random	0	0	0	0	Good	LFT	2017-09-13	SO-2017.1	0
SO_C_20170719_R_0449.JPG	2017-07-19 12:50:56	58.42289167	-135.9192944	223	Random	0	0	0	0	Good	LFT	2017-09-13	SO-2017.1	0
SO_C_20170719_R_0450.JPG	2017-07-19 12:50:57	58.42289167	-135.9201111	224	Random	0	0	0	0	Good	LFT	2017-09-13	SO-2017.1	0
SO_C_20170719_R_0451.JPG	2017-07-19 12:50:58	58.42289444	-135.920925	225	Random	0	0	0	0	Good	LFT	2017-09-13	SO-2017.1	0
SO_C_20170719_R_0452.JPG	2017-07-19 12:50:59	58.4229	-135.9217417	226	Random	0	0	0	0	Good	LFT	2017-09-13	SO-2017.1	0
SO_C_20170719_R_0453.JPG	2017-07-19 12:51:00	58.42290833	-135.9225611	225	Random	0	0	0	0	Good	LFT	2017-09-13	SO-2017.1	0
SO_C_20170719_R_0454.JPG	2017-07-19 12:51:01	58.42291389	-135.9233833	224	Random	0	0	0	0	Good	LFT	2017-09-13	SO-2017.1	0
SO_C_20170719_R_0455.JPG	2017-07-19 12:51:02	58.42291944	-135.9242056	223	Random	0	0	0	0	Good	LFT	2017-09-13	SO-2017.1	0
SO_C_20170719_R_0456.JPG	2017-07-19 12:51:03	58.422925	-135.9250333	222	Random	0	0	0	0	Good	LFT	2017-09-13	SO-2017.1	0
SO_C_20170719_R_0457.JPG	2017-07-19 12:51:04	58.42293333	-135.9258611	221	Random	0	0	0	0	Good	LFT	2017-09-13	SO-2017.1	0
SO_C_20170719_R_0458.JPG	2017-07-19 12:51:05	58.42293889	-135.9266944	221	Random	0	0	0	0	Good	LFT	2017-09-13	SO-2017.1	0
SO_C_20170719_R_0459.JPG	2017-07-19 12:51:06	58.42294167	-135.927525	221	Random	0	0	0	0	Good	LFT	2017-09-13	SO-2017.1	0
SO_C_20170719_R_0460.JPG	2017-07-19 12:51:07	58.42294167	-135.9283556	221	Random	0	0	0	0	Good	LFT	2017-09-13	SO-2017.1	0
SO_C_20170719_R_0461.JPG	2017-07-19 12:51:08	58.42293611	-135.9291833	221	Random	0	0	0	0	Good	LFT	2017-09-13	SO-2017.1	0
SO_C_20170719_R_0462.JPG	2017-07-19 12:51:09	58.42293056	-135.9300111	221	Random	0	0	0	0	Good	LFT	2017-09-13	SO-2017.1	0
SO_C_20170719_R_0463.JPG	2017-07-19 12:51:10	58.42292222	-135.9308389	222	Random	0	0	0	0	Good	LFT	2017-09-13	SO-2017.1	0
SO_C_20170719_R_0464.JPG	2017-07-19 12:51:11	58.42291389	-135.9316667	222	Random	0	0	0	0	Good	LFT	2017-09-13	SO-2017.1	0
SO_C_20170719_R_0465.JPG	2017-07-19 12:51:12	58.42290556	-135.9324944	222	Random	0	0	0	0	Good	LFT	2017-09-13	SO-2017.1	0
SO_C_20170719_R_0466.JPG	2017-07-19 12:51:13	58.4229	-135.9333222	223	Random	0	0	0	0	Good	LFT	2017-09-13	SO-2017.1	0
SO_C_20170719_R_0467.JPG	2017-07-19 12:51:14	58.42289444	-135.9341472	223	Random	0	0	0	0	Good	LFT	2017-09-13	SO-2017.1	0
SO_C_20170719_R_0468.JPG	2017-07-19 12:51:15	58.42288889	-135.934975	224	Random	0	0	0	0	Good	LFT	2017-09-13	SO-2017.1	0
SO_C_20170719_R_0469.JPG	2017-07-19 12:51:16	58.42288333	-135.9358	224	Random	0	0	0	0	Good	LFT	2017-09-13	SO-2017.1	0
SO_C_20170719_R_0470.JPG	2017-07-19 12:51:17	58.42288333	-135.9366278	225	Random	0	0	0	0	Good	LFT	2017-09-13	SO-2017.1	0
SO_C_20170719_R_0471.JPG	2017-07-19 12:51:18	58.42288333	-135.9374556	224	Random	0	0	0	0	Good	LFT	2017-09-13	SO-2017.1	0
SO_C_20170719_R_0472.JPG	2017-07-19 12:51:19	58.42288333	-135.9382833	225	Random	0	0	0	0	Good	LFT	2017-09-13	SO-2017.1	0
SO_C_20170719_R_0473.JPG	2017-07-19 12:51:20	58.42288611	-135.9391083	225	Random	0	0	0	0	Good	LFT	2017-09-13	SO-2017.1	0
SO_C_20170719_R_0474.JPG	2017-07-19 12:51:21	58.42288889	-135.9399361	225	Random	0	0	0	0	Good	LFT	2017-09-13	SO-2017.1	0
SO_C_20170719_R_0475.JPG	2017-07-19 12:51:22	58.42288611	-135.9407639	226	Random	0	0	0	0	Good	LFT	2017-09-13	SO-2017.1	0
SO_C_20170719_R_0476.JPG	2017-07-19 12:51:23	58.42288611	-135.9415944	226	Random	0	0	0	0	Good	LFT	2017-09-13	SO-2017.1	0
SO_C_20170719_R_0477.JPG	2017-07-19 12:51:24	58.42288333	-135.9424278	225	Random	0	0	0	0	Good	LFT	2017-09-13	SO-2017.1	0
SO_C_20170719_R_0478.JPG	2017-07-19 12:51:25	58.42288056	-135.9432611	225	Random	0	0	0	0	Good	LFT	2017-09-13	SO-2017.1	0
SO_C_20170719_R_0479.JPG	2017-07-19 12:51:26	58.42287778	-135.9440972	224	Random	0	0	0	0	Good	LFT	2017-09-13	SO-2017.1	0
SO_C_20170719_R_0480.JPG	2017-07-19 12:51:27	58.42286944	-135.9449361	224	Random	0	0	0	0	Good	LFT	2017-09-13	SO-2017.1	0
SO_C_20170719_R_0481.JPG	2017-07-19 12:51:28	58.42286111	-135.9457778	222	Random	0	0	0	0	Good	LFT	2017-09-13	SO-2017.1	0
SO_C_20170719_R_0482.JPG	2017-07-19 12:51:29	58.42285	-135.9466194	222	Random	0	0	0	0	Good	LFT	2017-09-13	SO-2017.1	0
SO_C_20170719_R_0483.JPG	2017-07-19 12:51:30	58.42283889	-135.9474639	222	Random	0	0	1	0	Good	LFT	2017-09-13	SO-2017.1	0
SO_C_20170719_R_0484.JPG	2017-07-19 12:51:31	58.422825	-135.9483083	221	Random	0	0	1	0	Good	LFT	2017-09-13	SO-2017.1	0
SO_C_20170719_R_0485.JPG	2017-07-19 12:51:32	58.42281389	-135.9491556	220	Random	0	0	0	0	Good	LFT	2017-09-13	SO-2017.1	0
SO_C_20170719_R_0486.JPG	2017-07-19 12:51:33	58.4228	-135.9500028	220	Random	0	0	0	0	Good	LFT	2017-09-13	SO-2017.1	0
SO_C_20170719_R_0487.JPG	2017-07-19 12:51:34	58.42278889	-135.9508528	220	Random	0	0	0	0	Good	LFT	2017-09-13	SO-2017.1	0
SO_C_20170719_R_0488.JPG	2017-07-19 12:51:35	58.42278056	-135.9517	220	Random	1	0	0	0	Good	LFT	2017-09-26	SO-2017.1	0
SO_C_20170719_R_0489.JPG	2017-07-19 12:51:36	58.422775	-135.9525472	220	Random	0	0	0	0	Good	LFT	2017-09-13	SO-2017.1	0
SO_C_20170719_R_0490.JPG	2017-07-19 12:51:37	58.422775	-135.9533917	221	Random	0	0	0	0	Good	LFT	2017-09-13	SO-2017.1	0
SO_C_20170719_R_0491.JPG	2017-07-19 12:51:38	58.42277778	-135.9542361	223	Random	0	0	0	0	Good	LFT	2017-09-13	SO-2017.1	0
SO_C_20170719_R_0492.JPG	2017-07-19 12:51:39	58.42278333	-135.955075	224	Random	1	0	0	0	Good	LFT	2017-09-26	SO-2017.1	0
SO_C_20170719_R_0493.JPG	2017-07-19 12:51:40	58.42278889	-135.9559139	224	Random	0	0	0	0	Good	LFT	2017-09-13	SO-2017.1	0
SO_C_20170719_R_0494.JPG	2017-07-19 12:51:41	58.4228	-135.9567472	226	Random	0	0	0	0	Good	LFT	2017-09-13	SO-2017.1	0
SO_C_20170719_R_0495.JPG	2017-07-19 12:51:42	58.42281111	-135.9575833	226	Random	1	0	0	0	Good	LFT	2017-09-26	SO-2017.1	0
SO_C_20170719_R_0496.JPG	2017-07-19 12:51:43	58.42282778	-135.9584194	226	Random	0	0	0	0	Good	LFT	2017-09-13	SO-2017.1	0
SO_C_20170719_R_0497.JPG	2017-07-19 12:51:44	58.42284444	-135.9592583	226	Random	0	0	0	0	Good	LFT	2017-09-13	SO-2017.1	0
SO_C_20170719_R_0498.JPG	2017-07-19 12:51:45	58.42286667	-135.9601	225	Random	0	0	0	0	Good	LFT	2017-09-13	SO-2017.1	0
SO_C_20170719_R_0499.JPG	2017-07-19 12:51:46	58.42289444	-135.9609444	224	Random	0	0	0	0	Good	LFT	2017-09-13	SO-2017.1	0
SO_C_20170719_R_0500.JPG	2017-07-19 12:51:47	58.42292222	-135.9617889	223	Random	0	0	0	0	Good	LFT	2017-09-13	SO-2017.1	0
SO_C_20170719_R_0501.JPG	2017-07-19 12:51:48	58.42295	-135.9626361	222	Random	0	0	0	0	Good	LFT	2017-09-13	SO-2017.1	0
SO_C_20170719_R_0502.JPG	2017-07-19 12:51:49	58.422975	-135.9634833	223	Random	0	0	0	0	Good	LFT	2017-09-13	SO-2017.1	0
SO_C_20170719_R_0503.JPG	2017-07-19 12:51:50	58.423	-135.9643278	222	Random	0	0	0	0	Good	LFT	2017-09-13	SO-2017.1	0
SO_C_20170719_R_0504.JPG	2017-07-19 12:51:51	58.42301667	-135.9651722	223	Random	0	0	0	0	Good	LFT	2017-09-13	SO-2017.1	0
SO_C_20170719_R_0505.JPG	2017-07-19 12:51:52	58.42303056	-135.9660167	223	Random	0	0	0	0	Good	LFT	2017-09-13	SO-2017.1	0
SO_C_20170719_R_0506.JPG	2017-07-19 12:51:53	58.42303611	-135.9668556	224	Random	0	0	0	0	Good	LFT	2017-09-13	SO-2017.1	0
SO_C_20170719_R_0507.JPG	2017-07-19 12:51:54	58.42303889	-135.9676917	225	Random	0	0	0	0	Good	LFT	2017-09-13	SO-2017.1	0
SO_C_20170719_R_0508.JPG	2017-07-19 12:51:55	58.42303333	-135.9685222	226	Random	0	0	0	0	Good	LFT	2017-09-13	SO-2017.1	0
SO_C_20170719_R_0509.JPG	2017-07-19 12:51:56	58.423025	-135.96935	226	Random	0	0	1	0	Good	LFT	2017-09-13	SO-2017.1	0
SO_C_20170719_R_0510.JPG	2017-07-19 12:51:57	58.42301667	-135.9701778	227	Random	0	0	0	0	Good	LFT	2017-09-13	SO-2017.1	0
SO_C_20170719_R_0511.JPG	2017-07-19 12:51:58	58.42300556	-135.9710028	227	Random	0	0	1	0	Good	LFT	2017-09-13	SO-2017.1	0
SO_C_20170719_R_0512.JPG	2017-07-19 12:51:59	58.42299444	-135.9718306	227	Random	0	0	0	0	Good	LFT	2017-09-13	SO-2017.1	0
SO_C_20170719_R_0513.JPG	2017-07-19 12:52:00	58.42298056	-135.9726639	226	Random	0	0	1	0	Good	LFT	2017-09-13	SO-2017.1	0
SO_C_20170719_R_0514.JPG	2017-07-19 12:52:01	58.42296667	-135.9735	225	Random	0	0	1	0	Good	LFT	2017-09-13	SO-2017.1	0
SO_C_20170719_R_0515.JPG	2017-07-19 12:52:02	58.42295556	-135.9743417	224	Random	0	0	0	0	Good	LFT	2017-09-13	SO-2017.1	0
SO_C_20170719_R_0516.JPG	2017-07-19 12:52:03	58.42294167	-135.9751889	222	Random	0	0	0	0	Good	LFT	2017-09-13	SO-2017.1	0
SO_C_20170719_R_0517.JPG	2017-07-19 12:52:04	58.42292778	-135.9760389	220	Random	0	0	0	0	Good	LFT	2017-09-13	SO-2017.1	0
SO_C_20170719_R_0518.JPG	2017-07-19 12:52:05	58.42291111	-135.9768944	219	Random	0	0	0	0	Good	LFT	2017-09-13	SO-2017.1	0
SO_C_20170719_R_0519.JPG	2017-07-19 12:52:06	58.42289444	-135.97775	218	Random	0	0	0	0	Good	LFT	2017-09-13	SO-2017.1	0
SO_C_20170719_R_0520.JPG	2017-07-19 12:52:07	58.42287778	-135.9786056	218	Random	0	0	0	0	Good	LFT	2017-09-13	SO-2017.1	0
SO_C_20170719_R_0521.JPG	2017-07-19 12:52:08	58.42286111	-135.9794611	218	Random	0	0	0	0	Good	LFT	2017-09-13	SO-2017.1	0
SO_C_20170719_R_0522.JPG	2017-07-19 12:52:09	58.42284444	-135.9803111	218	Random	0	0	0	0	Good	LFT	2017-09-13	SO-2017.1	0
SO_C_20170719_R_0523.JPG	2017-07-19 12:52:10	58.422825	-135.9811611	219	Random	0	0	0	0	Good	LFT	2017-09-13	SO-2017.1	0
SO_C_20170719_R_0524.JPG	2017-07-19 12:52:11	58.42280278	-135.9820056	219	Random	0	0	0	0	Good	LFT	2017-09-13	SO-2017.1	0
SO_C_20170719_R_0525.JPG	2017-07-19 12:52:12	58.42278056	-135.98285	221	Random	0	0	0	0	Good	LFT	2017-09-13	SO-2017.1	0
SO_C_20170719_R_0526.JPG	2017-07-19 12:52:13	58.42276111	-135.9836917	221	Random	0	0	0	0	Good	LFT	2017-09-13	SO-2017.1	0
SO_C_20170719_R_0527.JPG	2017-07-19 12:52:14	58.42274167	-135.9845333	221	Random	0	0	0	0	Good	LFT	2017-09-13	SO-2017.1	0
SO_C_20170719_R_0528.JPG	2017-07-19 12:52:15	58.422725	-135.9853722	222	Random	0	0	0	0	Good	LFT	2017-09-13	SO-2017.1	0
SO_C_20170719_R_0529.JPG	2017-07-19 12:52:16	58.42271111	-135.9862111	222	Random	0	0	0	0	Good	LFT	2017-09-13	SO-2017.1	0
SO_C_20170719_R_0530.JPG	2017-07-19 12:52:17	58.4227	-135.98705	221	Random	0	0	0	0	Good	LFT	2017-09-13	SO-2017.1	0
SO_C_20170719_R_0531.JPG	2017-07-19 12:52:18	58.42269167	-135.9878917	222	Random	0	0	0	0	Good	LFT	2017-09-13	SO-2017.1	0
SO_C_20170719_R_0532.JPG	2017-07-19 12:52:19	58.42268333	-135.9887333	222	Random	0	0	0	0	Good	LFT	2017-09-13	SO-2017.1	0
SO_C_20170719_R_0533.JPG	2017-07-19 12:52:20	58.422675	-135.9895778	222	Random	0	0	0	0	Good	LFT	2017-09-13	SO-2017.1	0
SO_C_20170719_R_0534.JPG	2017-07-19 12:52:21	58.42266667	-135.9904194	222	Random	0	0	0	0	Good	LFT	2017-09-13	SO-2017.1	0
SO_C_20170719_R_0535.JPG	2017-07-19 12:52:22	58.42266111	-135.9912639	221	Random	0	0	0	0	Good	LFT	2017-09-13	SO-2017.1	0
SO_C_20170719_R_0536.JPG	2017-07-19 12:52:23	58.42265278	-135.9921083	221	Random	0	0	0	0	Good	LFT	2017-09-13	SO-2017.1	0
SO_C_20170719_R_0537.JPG	2017-07-19 12:52:24	58.42264444	-135.9929528	220	Random	0	0	0	0	Good	LFT	2017-09-13	SO-2017.1	0
SO_C_20170719_R_0538.JPG	2017-07-19 12:52:25	58.42263333	-135.9938	220	Random	0	0	0	0	Good	LFT	2017-09-13	SO-2017.1	0
SO_C_20170719_R_0539.JPG	2017-07-19 12:52:26	58.42261944	-135.99465	219	Random	0	0	1	0	Good	LFT	2017-09-13	SO-2017.1	0
SO_C_20170719_R_0540.JPG	2017-07-19 12:52:27	58.42260556	-135.9954972	219	Random	0	0	1	0	Good	LFT	2017-09-13	SO-2017.1	0
SO_C_20170719_R_0541.JPG	2017-07-19 12:52:28	58.42258889	-135.9963444	220	Random	0	0	1	0	Good	LFT	2017-09-13	SO-2017.1	0
SO_C_20170719_R_0542.JPG	2017-07-19 12:52:29	58.42256944	-135.9971917	219	Random	0	0	1	0	Good	LFT	2017-09-13	SO-2017.1	0
SO_C_20170719_R_0543.JPG	2017-07-19 12:52:30	58.42255278	-135.9980389	219	Random	0	0	0	0	Good	LFT	2017-09-13	SO-2017.1	0
SO_C_20170719_R_0544.JPG	2017-07-19 12:52:31	58.42253889	-135.9988861	220	Random	0	0	0	0	Good	LFT	2017-09-13	SO-2017.1	0
SO_C_20170719_R_0545.JPG	2017-07-19 12:52:32	58.42252778	-135.9997306	220	Random	0	0	1	0	Good	LFT	2017-09-13	SO-2017.1	0
SO_C_20170719_R_0546.JPG	2017-07-19 12:52:33	58.42251944	-136.000575	220	Random	0	0	0	0	Good	LFT	2017-09-13	SO-2017.1	0
SO_C_20170719_R_0547.JPG	2017-07-19 12:52:34	58.42251111	-136.0014194	221	Random	0	0	0	0	Good	LFT	2017-09-13	SO-2017.1	0
SO_C_20170719_R_0548.JPG	2017-07-19 12:52:35	58.4225	-136.0022583	222	Random	0	0	1	0	Good	LFT	2017-09-13	SO-2017.1	0
SO_C_20170719_R_0549.JPG	2017-07-19 12:52:36	58.42248889	-136.0030972	222	Random	0	0	1	0	Good	LFT	2017-09-13	SO-2017.1	0
SO_C_20170719_R_0550.JPG	2017-07-19 12:52:37	58.42247778	-136.0039306	222	Random	0	0	1	0	Good	LFT	2017-09-13	SO-2017.1	0
SO_C_20170719_R_0551.JPG	2017-07-19 12:52:38	58.42246667	-136.0047639	223	Random	0	0	0	0	Good	LFT	2017-09-13	SO-2017.1	0
SO_C_20170719_R_0552.JPG	2017-07-19 12:52:39	58.42245556	-136.0055972	223	Random	0	0	1	0	Good	LFT	2017-09-13	SO-2017.1	0
SO_C_20170719_R_0553.JPG	2017-07-19 12:52:40	58.42244444	-136.0064306	224	Random	0	0	1	0	Good	LFT	2017-09-13	SO-2017.1	0
SO_C_20170719_R_0554.JPG	2017-07-19 12:52:41	58.42243333	-136.0072611	223	Random	0	0	1	0	Good	LFT	2017-09-13	SO-2017.1	0
SO_C_20170719_R_0555.JPG	2017-07-19 12:52:42	58.422425	-136.0080944	223	Random	0	0	1	0	Good	LFT	2017-09-13	SO-2017.1	0
SO_C_20170719_R_0556.JPG	2017-07-19 12:52:43	58.42241944	-136.0089278	224	Random	0	0	0	0	Good	LFT	2017-09-13	SO-2017.1	0
SO_C_20170719_R_0557.JPG	2017-07-19 12:52:44	58.42241389	-136.0097639	223	Random	0	0	0	0	Good	LFT	2017-09-13	SO-2017.1	0
SO_C_20170719_R_0558.JPG	2017-07-19 12:52:45	58.42241111	-136.0106	223	Random	0	0	0	0	Good	LFT	2017-09-13	SO-2017.1	0
SO_C_20170719_R_0559.JPG	2017-07-19 12:52:46	58.42240556	-136.0114361	222	Random	0	0	0	0	Good	LFT	2017-09-13	SO-2017.1	0
SO_C_20170719_R_0560.JPG	2017-07-19 12:52:47	58.4224	-136.012275	221	Random	0	0	0	0	Good	LFT	2017-09-13	SO-2017.1	0
SO_C_20170719_R_0561.JPG	2017-07-19 12:52:48	58.42239167	-136.0131139	220	Random	0	0	0	0	Good	LFT	2017-09-13	SO-2017.1	0
SO_C_20170719_R_0562.JPG	2017-07-19 12:52:49	58.42238333	-136.01395	219	Random	0	0	0	0	Good	LFT	2017-09-13	SO-2017.1	0
SO_C_20170719_R_0563.JPG	2017-07-19 12:52:50	58.42236944	-136.0147861	218	Random	0	0	0	0	Good	LFT	2017-09-13	SO-2017.1	0
SO_C_20170719_R_0564.JPG	2017-07-19 12:52:51	58.42235278	-136.0156194	217	Random	0	0	0	0	Good	LFT	2017-09-13	SO-2017.1	0
SO_C_20170719_R_0565.JPG	2017-07-19 12:52:52	58.42233889	-136.0164528	218	Random	0	0	0	0	Good	LFT	2017-09-13	SO-2017.1	0
SO_C_20170719_R_0566.JPG	2017-07-19 12:52:53	58.42232778	-136.0172833	218	Random	0	0	0	0	Good	LFT	2017-09-13	SO-2017.1	0
SO_C_20170719_R_0567.JPG	2017-07-19 12:52:54	58.42231667	-136.0181111	219	Random	0	0	0	0	Good	LFT	2017-09-13	SO-2017.1	0
SO_C_20170719_R_0568.JPG	2017-07-19 12:52:55	58.42231111	-136.0189389	219	Random	0	0	0	0	Good	LFT	2017-09-13	SO-2017.1	0
SO_C_20170719_R_0569.JPG	2017-07-19 12:52:56	58.42230556	-136.0197611	219	Random	0	0	0	0	Good	LFT	2017-09-13	SO-2017.1	0
SO_C_20170719_R_0570.JPG	2017-07-19 12:52:57	58.4223	-136.0205861	219	Random	0	0	0	0	Good	LFT	2017-09-13	SO-2017.1	0
SO_C_20170719_R_0571.JPG	2017-07-19 12:52:58	58.42229722	-136.0214083	219	Random	0	0	0	0	Good	LFT	2017-09-13	SO-2017.1	0
SO_C_20170719_R_0572.JPG	2017-07-19 12:52:59	58.42228889	-136.0222278	219	Random	0	0	0	0	Good	LFT	2017-09-13	SO-2017.1	0
SO_C_20170719_R_0573.JPG	2017-07-19 12:53:00	58.42228333	-136.02305	219	Random	0	0	0	0	Good	LFT	2017-09-13	SO-2017.1	0
SO_C_20170719_R_0574.JPG	2017-07-19 12:53:01	58.422275	-136.0238694	220	Random	0	0	0	0	Good	LFT	2017-09-13	SO-2017.1	0
SO_C_20170719_R_0575.JPG	2017-07-19 12:53:02	58.42226389	-136.0246889	220	Random	0	0	0	0	Good	LFT	2017-09-13	SO-2017.1	0
SO_C_20170719_R_0576.JPG	2017-07-19 12:53:03	58.42225278	-136.0255083	220	Random	0	0	0	0	Good	LFT	2017-09-13	SO-2017.1	0
SO_C_20170719_R_0577.JPG	2017-07-19 12:53:04	58.42223611	-136.026325	221	Random	0	0	0	0	Good	LFT	2017-09-13	SO-2017.1	0
SO_C_20170719_R_0578.JPG	2017-07-19 12:53:05	58.42221944	-136.0271389	221	Random	0	0	0	0	Good	LFT	2017-09-13	SO-2017.1	0
SO_C_20170719_R_0579.JPG	2017-07-19 12:53:06	58.42220278	-136.02795	221	Random	0	0	0	0	Good	LFT	2017-09-13	SO-2017.1	0
SO_C_20170719_R_0580.JPG	2017-07-19 12:53:07	58.42218333	-136.0287583	221	Random	0	0	0	0	Good	LFT	2017-09-13	SO-2017.1	0
SO_C_20170719_R_0581.JPG	2017-07-19 12:53:08	58.42216389	-136.0295667	221	Random	0	0	0	0	Good	LFT	2017-09-13	SO-2017.1	0
SO_C_20170719_R_0582.JPG	2017-07-19 12:53:09	58.42215	-136.0303722	222	Random	0	0	0	0	Good	LFT	2017-09-13	SO-2017.1	0
SO_C_20170719_R_0583.JPG	2017-07-19 12:53:10	58.42213611	-136.0311778	221	Random	0	0	0	0	Good	LFT	2017-09-13	SO-2017.1	0
SO_C_20170719_R_0584.JPG	2017-07-19 12:53:11	58.422125	-136.0319833	221	Random	0	0	0	0	Good	LFT	2017-09-13	SO-2017.1	0
SO_C_20170719_R_0585.JPG	2017-07-19 12:53:12	58.42211389	-136.0327889	222	Random	0	0	0	0	Good	LFT	2017-09-13	SO-2017.1	0
SO_C_20170719_R_0586.JPG	2017-07-19 12:53:13	58.42210278	-136.0335944	222	Random	0	0	0	0	Good	LFT	2017-09-13	SO-2017.1	0
SO_C_20170719_R_0587.JPG	2017-07-19 12:53:14	58.42209444	-136.0344	222	Random	0	0	0	0	Good	LFT	2017-09-13	SO-2017.1	0
SO_C_20170719_R_0588.JPG	2017-07-19 12:53:15	58.42208333	-136.0352083	222	Random	0	0	0	0	Good	LFT	2017-09-13	SO-2017.1	0
SO_C_20170719_R_0589.JPG	2017-07-19 12:53:16	58.422075	-136.0360167	221	Random	0	0	0	0	Good	LFT	2017-09-13	SO-2017.1	0
SO_C_20170719_R_0590.JPG	2017-07-19 12:53:17	58.42206667	-136.036825	220	Random	0	0	0	0	Good	LFT	2017-09-13	SO-2017.1	0
SO_C_20170719_R_0591.JPG	2017-07-19 12:53:18	58.42205556	-136.0376361	220	Random	0	0	0	0	Good	LFT	2017-09-13	SO-2017.1	0
SO_C_20170719_R_0592.JPG	2017-07-19 12:53:19	58.42204444	-136.0384444	219	Random	0	0	0	0	Good	LFT	2017-09-13	SO-2017.1	0
SO_C_20170719_R_0593.JPG	2017-07-19 12:53:20	58.42203056	-136.0392556	219	Random	0	0	0	0	Good	LFT	2017-09-13	SO-2017.1	0
SO_C_20170719_R_0594.JPG	2017-07-19 12:53:21	58.42201667	-136.0400639	219	Random	0	0	0	0	Good	LFT	2017-09-13	SO-2017.1	0
SO_C_20170719_R_0595.JPG	2017-07-19 12:53:22	58.42200556	-136.0408722	218	Random	0	0	0	0	Good	LFT	2017-09-13	SO-2017.1	0
SO_C_20170719_R_0596.JPG	2017-07-19 12:53:23	58.42199444	-136.0416778	219	Random	0	0	0	0	Good	LFT	2017-09-13	SO-2017.1	0
SO_C_20170719_R_0597.JPG	2017-07-19 12:53:24	58.42198333	-136.0424806	219	Random	0	0	0	0	Good	LFT	2017-09-13	SO-2017.1	0
SO_C_20170719_R_0598.JPG	2017-07-19 12:53:25	58.42197222	-136.0432861	219	Random	0	0	0	0	Good	LFT	2017-09-13	SO-2017.1	0
SO_C_20170719_R_0599.JPG	2017-07-19 12:53:26	58.42196111	-136.0440861	220	Random	0	0	0	0	Good	LFT	2017-09-13	SO-2017.1	0
SO_C_20170719_R_0600.JPG	2017-07-19 12:53:27	58.42195	-136.0448889	221	Random	1	0	0	0	Good	LFT	2017-09-26	SO-2017.1	0
SO_C_20170719_R_0601.JPG	2017-07-19 12:53:28	58.42194167	-136.0456861	220	Random	0	0	0	0	Good	LFT	2017-09-13	SO-2017.1	0
SO_C_20170719_R_0602.JPG	2017-07-19 12:53:29	58.42193333	-136.0464861	221	Random	0	0	1	0	Good	LFT	2017-09-13	SO-2017.1	0
SO_C_20170719_R_0603.JPG	2017-07-19 12:53:30	58.421925	-136.0472861	220	Random	0	0	1	0	Good	LFT	2017-09-13	SO-2017.1	0
SO_C_20170719_R_0604.JPG	2017-07-19 12:53:31	58.42192222	-136.0480861	220	Random	0	0	0	0	Good	LFT	2017-09-13	SO-2017.1	0
SO_C_20170719_R_0605.JPG	2017-07-19 12:53:32	58.42191667	-136.0488889	220	Random	0	0	0	0	Good	LFT	2017-09-13	SO-2017.1	0
SO_C_20170719_R_0606.JPG	2017-07-19 12:53:33	58.42191111	-136.0496917	221	Random	0	0	0	0	Good	LFT	2017-09-13	SO-2017.1	0
SO_C_20170719_R_0607.JPG	2017-07-19 12:53:34	58.42189722	-136.0504944	222	Random	0	0	0	0	Good	LFT	2017-09-13	SO-2017.1	0
SO_C_20170719_R_0608.JPG	2017-07-19 12:53:35	58.42187778	-136.0512944	222	Random	0	0	0	0	Good	LFT	2017-09-13	SO-2017.1	0
SO_C_20170719_R_0609.JPG	2017-07-19 12:53:36	58.42185278	-136.0520944	222	Random	0	0	0	0	Good	LFT	2017-09-13	SO-2017.1	0
SO_C_20170719_R_0610.JPG	2017-07-19 12:53:37	58.421825	-136.0528944	223	Random	0	0	0	0	Good	LFT	2017-09-13	SO-2017.1	0
SO_C_20170719_R_0611.JPG	2017-07-19 12:53:38	58.42179444	-136.0536917	224	Random	0	0	0	0	Good	LFT	2017-09-13	SO-2017.1	0
SO_C_20170719_R_0612.JPG	2017-07-19 12:53:39	58.42176667	-136.0544889	223	Random	0	0	0	0	Good	LFT	2017-09-13	SO-2017.1	0
SO_C_20170719_R_0613.JPG	2017-07-19 12:53:40	58.42173611	-136.0552861	224	Random	0	0	0	0	Good	LFT	2017-09-13	SO-2017.1	0
SO_C_20170719_R_0614.JPG	2017-07-19 12:53:41	58.42170556	-136.0560806	223	Random	0	0	0	0	Good	LFT	2017-09-13	SO-2017.1	0
SO_C_20170719_R_0615.JPG	2017-07-19 12:53:42	58.42167778	-136.0568722	223	Random	0	0	0	0	Good	LFT	2017-09-13	SO-2017.1	0
SO_C_20170719_R_0616.JPG	2017-07-19 12:53:43	58.42165	-136.0576639	223	Random	0	0	1	0	Good	LFT	2017-09-13	SO-2017.1	0
SO_C_20170719_R_0617.JPG	2017-07-19 12:53:44	58.42162222	-136.0584556	223	Random	0	0	1	0	Good	LFT	2017-09-13	SO-2017.1	0
SO_C_20170719_R_0618.JPG	2017-07-19 12:53:45	58.42159722	-136.0592417	223	Random	0	0	1	0	Good	LFT	2017-09-13	SO-2017.1	0
SO_C_20170719_R_0619.JPG	2017-07-19 12:53:46	58.42156944	-136.0600278	224	Random	0	0	1	1	Good	LFT	2017-09-13	SO-2017.1	0
SO_C_20170719_R_0620.JPG	2017-07-19 12:53:47	58.42154444	-136.0608139	223	Random	0	0	1	1	Good	LFT	2017-09-13	SO-2017.1	0
SO_C_20170719_R_0621.JPG	2017-07-19 12:53:48	58.42151944	-136.0615972	223	Random	0	0	0	1	Good	LFT	2017-09-13	SO-2017.1	0
SO_C_20170719_R_0622.JPG	2017-07-19 12:53:49	58.42149167	-136.0623833	223	Random	0	0	0	1	Good	LFT	2017-09-13	SO-2017.1	0
SO_C_20170719_R_0623.JPG	2017-07-19 12:53:50	58.42146667	-136.0631667	222	Random	0	0	0	1	Good	LFT	2017-09-13	SO-2017.1	0
SO_C_20170719_R_0624.JPG	2017-07-19 12:55:58	58.42508333	-136.0730167	214	Random	0	0	0	1	Good	LFT	2017-09-13	SO-2017.1	0
SO_C_20170719_R_0625.JPG	2017-07-19 12:55:59	58.42512222	-136.0721472	213	Random	0	0	0	1	Good	LFT	2017-09-13	SO-2017.1	0
SO_C_20170719_R_0626.JPG	2017-07-19 12:56:00	58.42515278	-136.071275	212	Random	0	0	0	1	Good	LFT	2017-09-13	SO-2017.1	0
SO_C_20170719_R_0627.JPG	2017-07-19 12:56:01	58.42517222	-136.0704028	211	Random	0	0	0	1	Good	LFT	2017-09-13	SO-2017.1	0
SO_C_20170719_R_0628.JPG	2017-07-19 12:56:02	58.42518889	-136.0695278	210	Random	0	0	0	1	Good	LFT	2017-09-13	SO-2017.1	0
SO_C_20170719_R_0629.JPG	2017-07-19 12:56:03	58.42520278	-136.0686556	210	Random	0	0	0	1	Good	LFT	2017-09-13	SO-2017.1	0
SO_C_20170719_R_0630.JPG	2017-07-19 12:56:04	58.42520833	-136.0677861	212	Random	0	0	0	1	Good	LFT	2017-09-13	SO-2017.1	0
SO_C_20170719_R_0631.JPG	2017-07-19 12:56:05	58.42521667	-136.0669194	214	Random	0	0	0	1	Good	LFT	2017-09-13	SO-2017.1	0
SO_C_20170719_R_0632.JPG	2017-07-19 12:56:06	58.425225	-136.0660583	217	Random	0	0	0	1	Good	LFT	2017-09-13	SO-2017.1	0
SO_C_20170719_R_0633.JPG	2017-07-19 12:56:07	58.42524167	-136.0652056	220	Random	0	0	0	1	Good	LFT	2017-09-13	SO-2017.1	0
SO_C_20170719_R_0634.JPG	2017-07-19 12:56:08	58.42526111	-136.0643583	224	Random	0	0	0	1	Good	LFT	2017-09-13	SO-2017.1	0
SO_C_20170719_R_0635.JPG	2017-07-19 12:56:09	58.42528611	-136.0635167	227	Random	0	0	0	1	Good	LFT	2017-09-13	SO-2017.1	0
SO_C_20170719_R_0636.JPG	2017-07-19 12:56:10	58.42531111	-136.0626778	228	Random	0	0	0	1	Good	LFT	2017-09-13	SO-2017.1	0
SO_C_20170719_R_0637.JPG	2017-07-19 12:56:11	58.42533611	-136.0618361	228	Random	0	0	1	1	Good	LFT	2017-09-13	SO-2017.1	0
SO_C_20170719_R_0638.JPG	2017-07-19 12:56:12	58.42536389	-136.0609944	228	Random	0	0	1	0	Good	LFT	2017-09-13	SO-2017.1	0
SO_C_20170719_R_0639.JPG	2017-07-19 12:56:13	58.42538611	-136.0601444	226	Random	0	0	1	0	Good	LFT	2017-09-13	SO-2017.1	0
SO_C_20170719_R_0640.JPG	2017-07-19 12:56:14	58.42541111	-136.0592917	224	Random	0	0	0	0	Good	LFT	2017-09-13	SO-2017.1	0
SO_C_20170719_R_0641.JPG	2017-07-19 12:56:15	58.42543056	-136.0584333	222	Random	0	0	0	0	Good	LFT	2017-09-13	SO-2017.1	0
SO_C_20170719_R_0642.JPG	2017-07-19 12:56:16	58.42545	-136.0575694	220	Random	0	0	0	0	Good	LFT	2017-09-13	SO-2017.1	0
SO_C_20170719_R_0643.JPG	2017-07-19 12:56:17	58.42546389	-136.0567056	217	Random	0	0	0	0	Good	LFT	2017-09-13	SO-2017.1	0
SO_C_20170719_R_0644.JPG	2017-07-19 12:56:18	58.42547778	-136.0558417	217	Random	0	0	0	0	Good	LFT	2017-09-13	SO-2017.1	0
SO_C_20170719_R_0645.JPG	2017-07-19 12:56:19	58.42549444	-136.0549833	218	Random	0	0	0	0	Good	LFT	2017-09-13	SO-2017.1	0
SO_C_20170719_R_0646.JPG	2017-07-19 12:56:20	58.42551389	-136.0541306	219	Random	0	0	0	0	Good	LFT	2017-09-13	SO-2017.1	0
SO_C_20170719_R_0647.JPG	2017-07-19 12:56:21	58.42553611	-136.0532833	221	Random	0	0	0	0	Good	LFT	2017-09-13	SO-2017.1	0
SO_C_20170719_R_0648.JPG	2017-07-19 12:56:22	58.42555556	-136.0524472	223	Random	0	0	0	0	Good	LFT	2017-09-13	SO-2017.1	0
SO_C_20170719_R_0649.JPG	2017-07-19 12:56:23	58.42556944	-136.0516139	225	Random	0	0	0	0	Good	LFT	2017-09-13	SO-2017.1	0
SO_C_20170719_R_0650.JPG	2017-07-19 12:56:24	58.42558056	-136.0507861	226	Random	0	0	0	0	Good	LFT	2017-09-13	SO-2017.1	0
SO_C_20170719_R_0651.JPG	2017-07-19 12:56:25	58.42559444	-136.0499611	225	Random	0	0	0	0	Good	LFT	2017-09-13	SO-2017.1	0
SO_C_20170719_R_0652.JPG	2017-07-19 12:56:26	58.42560833	-136.0491333	225	Random	0	0	0	0	Good	LFT	2017-09-13	SO-2017.1	0
SO_C_20170719_R_0653.JPG	2017-07-19 12:56:27	58.42562222	-136.0483056	224	Random	0	0	0	0	Good	LFT	2017-09-13	SO-2017.1	0
SO_C_20170719_R_0654.JPG	2017-07-19 12:56:28	58.42564167	-136.0474694	223	Random	0	0	0	0	Good	LFT	2017-09-13	SO-2017.1	0
SO_C_20170719_R_0655.JPG	2017-07-19 12:56:29	58.42565833	-136.0466306	220	Random	0	0	1	0	Good	LFT	2017-09-13	SO-2017.1	0
SO_C_20170719_R_0656.JPG	2017-07-19 12:56:30	58.425675	-136.0457861	218	Random	0	0	0	0	Good	LFT	2017-09-13	SO-2017.1	0
SO_C_20170719_R_0657.JPG	2017-07-19 12:56:31	58.42568889	-136.0449361	217	Random	0	0	0	0	Good	LFT	2017-09-13	SO-2017.1	0
SO_C_20170719_R_0658.JPG	2017-07-19 12:56:32	58.4257	-136.0440861	216	Random	0	0	0	0	Good	LFT	2017-09-13	SO-2017.1	0
SO_C_20170719_R_0659.JPG	2017-07-19 12:56:33	58.42571111	-136.0432361	216	Random	0	0	0	0	Good	LFT	2017-09-13	SO-2017.1	0
SO_C_20170719_R_0660.JPG	2017-07-19 12:56:34	58.42571667	-136.0423861	216	Random	0	0	0	0	Good	LFT	2017-09-13	SO-2017.1	0
SO_C_20170719_R_0661.JPG	2017-07-19 12:56:35	58.42571944	-136.0415417	216	Random	0	0	0	0	Good	LFT	2017-09-13	SO-2017.1	0
SO_C_20170719_R_0662.JPG	2017-07-19 12:56:36	58.42572222	-136.0406972	216	Random	0	0	0	0	Good	LFT	2017-09-13	SO-2017.1	0
SO_C_20170719_R_0663.JPG	2017-07-19 12:56:37	58.425725	-136.0398583	216	Random	0	0	0	0	Good	LFT	2017-09-13	SO-2017.1	0
SO_C_20170719_R_0664.JPG	2017-07-19 12:56:38	58.42572778	-136.0390222	216	Random	0	0	0	0	Good	LFT	2017-09-13	SO-2017.1	0
SO_C_20170719_R_0665.JPG	2017-07-19 12:56:39	58.42573056	-136.0381889	217	Random	0	0	0	0	Good	LFT	2017-09-13	SO-2017.1	0
SO_C_20170719_R_0666.JPG	2017-07-19 12:56:40	58.42573611	-136.0373556	218	Random	0	0	0	0	Good	LFT	2017-09-13	SO-2017.1	0
SO_C_20170719_R_0667.JPG	2017-07-19 12:56:41	58.42573611	-136.036525	218	Random	0	0	0	0	Good	LFT	2017-09-13	SO-2017.1	0
SO_C_20170719_R_0668.JPG	2017-07-19 12:56:42	58.42574167	-136.0356972	217	Random	0	0	0	0	Good	LFT	2017-09-13	SO-2017.1	0
SO_C_20170719_R_0669.JPG	2017-07-19 12:56:43	58.42574722	-136.0348694	217	Random	0	0	0	0	Good	LFT	2017-09-13	SO-2017.1	0
SO_C_20170719_R_0670.JPG	2017-07-19 12:56:44	58.42575833	-136.0340389	217	Random	0	0	0	0	Good	LFT	2017-09-13	SO-2017.1	0
SO_C_20170719_R_0671.JPG	2017-07-19 12:56:45	58.42577222	-136.0332083	216	Random	0	0	1	0	Good	LFT	2017-09-13	SO-2017.1	0
SO_C_20170719_R_0672.JPG	2017-07-19 12:56:46	58.42578889	-136.032375	215	Random	0	0	0	0	Good	LFT	2017-09-13	SO-2017.1	0
SO_C_20170719_R_0673.JPG	2017-07-19 12:56:47	58.42580556	-136.0315389	213	Random	0	0	0	0	Good	LFT	2017-09-13	SO-2017.1	0
SO_C_20170719_R_0674.JPG	2017-07-19 12:56:48	58.42582222	-136.0307	212	Random	0	0	0	0	Good	LFT	2017-09-13	SO-2017.1	0
SO_C_20170719_R_0675.JPG	2017-07-19 12:56:49	58.42583889	-136.0298611	211	Random	0	0	0	0	Good	LFT	2017-09-13	SO-2017.1	0
SO_C_20170719_R_0676.JPG	2017-07-19 12:56:50	58.42585278	-136.0290194	211	Random	0	0	0	0	Good	LFT	2017-09-13	SO-2017.1	0
SO_C_20170719_R_0677.JPG	2017-07-19 12:56:51	58.42586389	-136.0281806	212	Random	0	0	0	0	Good	LFT	2017-09-13	SO-2017.1	0
SO_C_20170719_R_0678.JPG	2017-07-19 12:56:52	58.42587222	-136.0273472	213	Random	0	0	0	0	Good	LFT	2017-09-13	SO-2017.1	0
SO_C_20170719_R_0679.JPG	2017-07-19 12:56:53	58.42587778	-136.0265167	213	Random	0	0	1	0	Good	LFT	2017-09-13	SO-2017.1	0
SO_C_20170719_R_0680.JPG	2017-07-19 12:56:54	58.42588611	-136.0256917	214	Random	0	0	1	0	Good	LFT	2017-09-13	SO-2017.1	0
SO_C_20170719_R_0681.JPG	2017-07-19 12:56:55	58.42589167	-136.0248667	214	Random	0	0	1	0	Good	LFT	2017-09-13	SO-2017.1	0
SO_C_20170719_R_0682.JPG	2017-07-19 12:56:56	58.42589722	-136.02405	214	Random	0	0	1	0	Good	LFT	2017-09-13	SO-2017.1	0
SO_C_20170719_R_0683.JPG	2017-07-19 12:56:57	58.42590278	-136.0232333	214	Random	0	0	0	0	Good	LFT	2017-09-13	SO-2017.1	0
SO_C_20170719_R_0684.JPG	2017-07-19 12:56:58	58.42590833	-136.0224194	215	Random	0	0	0	0	Good	LFT	2017-09-13	SO-2017.1	0
SO_C_20170719_R_0685.JPG	2017-07-19 12:56:59	58.42591111	-136.0216111	216	Random	0	0	0	0	Good	LFT	2017-09-13	SO-2017.1	0
SO_C_20170719_R_0686.JPG	2017-07-19 12:57:00	58.42591389	-136.0208056	218	Random	0	0	0	0	Good	LFT	2017-09-13	SO-2017.1	0
SO_C_20170719_R_0687.JPG	2017-07-19 12:57:01	58.42591667	-136.0200028	219	Random	0	0	0	0	Good	LFT	2017-09-13	SO-2017.1	0
SO_C_20170719_R_0688.JPG	2017-07-19 12:57:02	58.42591944	-136.0192056	221	Random	0	0	0	0	Good	LFT	2017-09-13	SO-2017.1	0
SO_C_20170719_R_0689.JPG	2017-07-19 12:57:03	58.42592222	-136.0184111	222	Random	0	0	0	0	Good	LFT	2017-09-13	SO-2017.1	0
SO_C_20170719_R_0690.JPG	2017-07-19 12:57:04	58.42592778	-136.0176194	222	Random	0	0	0	0	Good	LFT	2017-09-13	SO-2017.1	0
SO_C_20170719_R_0691.JPG	2017-07-19 12:57:05	58.42592778	-136.0168222	221	Random	0	0	0	0	Good	LFT	2017-09-13	SO-2017.1	0
SO_C_20170719_R_0692.JPG	2017-07-19 12:57:06	58.42593056	-136.0160222	219	Random	0	0	0	0	Good	LFT	2017-09-13	SO-2017.1	0
SO_C_20170719_R_0693.JPG	2017-07-19 12:57:07	58.42593056	-136.0152167	217	Random	0	0	0	0	Good	LFT	2017-09-13	SO-2017.1	0
SO_C_20170719_R_0694.JPG	2017-07-19 12:57:08	58.42593333	-136.0144028	216	Random	0	0	0	0	Good	LFT	2017-09-13	SO-2017.1	0
SO_C_20170719_R_0695.JPG	2017-07-19 12:57:09	58.42593611	-136.0135889	215	Random	0	0	0	0	Good	LFT	2017-09-13	SO-2017.1	0
SO_C_20170719_R_0696.JPG	2017-07-19 12:57:10	58.42594167	-136.0127694	214	Random	0	0	0	0	Good	LFT	2017-09-13	SO-2017.1	0
SO_C_20170719_R_0697.JPG	2017-07-19 12:57:11	58.42594722	-136.01195	214	Random	0	0	1	0	Good	LFT	2017-09-13	SO-2017.1	0
SO_C_20170719_R_0698.JPG	2017-07-19 12:57:12	58.42595278	-136.0111306	214	Random	0	0	0	0	Good	LFT	2017-09-13	SO-2017.1	0
SO_C_20170719_R_0699.JPG	2017-07-19 12:57:13	58.42596111	-136.0103139	214	Random	0	0	0	0	Good	LFT	2017-09-13	SO-2017.1	0
SO_C_20170719_R_0700.JPG	2017-07-19 12:57:14	58.42596944	-136.0095	215	Random	0	0	0	0	Good	LFT	2017-09-13	SO-2017.1	0
SO_C_20170719_R_0701.JPG	2017-07-19 12:57:15	58.425975	-136.0086861	216	Random	0	0	0	0	Good	LFT	2017-09-13	SO-2017.1	0
SO_C_20170719_R_0702.JPG	2017-07-19 12:57:16	58.425975	-136.0078778	217	Random	0	0	0	0	Good	LFT	2017-09-13	SO-2017.1	0
SO_C_20170719_R_0703.JPG	2017-07-19 12:57:17	58.42597778	-136.0070667	217	Random	0	0	0	0	Good	LFT	2017-09-13	SO-2017.1	0
SO_C_20170719_R_0704.JPG	2017-07-19 12:57:18	58.42597778	-136.0062611	219	Random	0	0	1	0	Good	LFT	2017-09-13	SO-2017.1	0
SO_C_20170719_R_0705.JPG	2017-07-19 12:57:19	58.425975	-136.0054556	220	Random	0	0	0	0	Good	LFT	2017-09-13	SO-2017.1	0
SO_C_20170719_R_0706.JPG	2017-07-19 12:57:20	58.42597222	-136.0046528	220	Random	0	0	0	0	Good	LFT	2017-09-13	SO-2017.1	0
SO_C_20170719_R_0707.JPG	2017-07-19 12:57:21	58.42597222	-136.0038528	222	Random	0	0	0	0	Good	LFT	2017-09-13	SO-2017.1	0
SO_C_20170719_R_0708.JPG	2017-07-19 12:57:22	58.42596944	-136.0030528	222	Random	0	0	0	0	Good	LFT	2017-09-13	SO-2017.1	0
SO_C_20170719_R_0709.JPG	2017-07-19 12:57:23	58.42596667	-136.00225	222	Random	0	0	0	0	Good	LFT	2017-09-13	SO-2017.1	0
SO_C_20170719_R_0710.JPG	2017-07-19 12:57:24	58.42596667	-136.0014444	221	Random	0	0	0	0	Good	LFT	2017-09-13	SO-2017.1	0
SO_C_20170719_R_0711.JPG	2017-07-19 12:57:25	58.42596667	-136.0006361	219	Random	0	0	0	0	Good	LFT	2017-09-13	SO-2017.1	0
SO_C_20170719_R_0712.JPG	2017-07-19 12:57:26	58.42596389	-135.999825	218	Random	0	0	0	0	Good	LFT	2017-09-13	SO-2017.1	0
SO_C_20170719_R_0713.JPG	2017-07-19 12:57:27	58.42596389	-135.9990111	217	Random	0	0	0	0	Good	LFT	2017-09-13	SO-2017.1	0
SO_C_20170719_R_0714.JPG	2017-07-19 12:57:28	58.42596389	-135.9981944	217	Random	0	0	0	0	Good	LFT	2017-09-13	SO-2017.1	0
SO_C_20170719_R_0715.JPG	2017-07-19 12:57:29	58.42596944	-135.997375	216	Random	0	0	0	0	Good	LFT	2017-09-13	SO-2017.1	0
SO_C_20170719_R_0716.JPG	2017-07-19 12:57:30	58.42597222	-135.9965583	216	Random	0	0	0	0	Good	LFT	2017-09-13	SO-2017.1	0
SO_C_20170719_R_0717.JPG	2017-07-19 12:57:31	58.42597222	-135.9957417	217	Random	0	0	0	0	Good	LFT	2017-09-13	SO-2017.1	0
SO_C_20170719_R_0718.JPG	2017-07-19 12:57:32	58.425975	-135.9949278	217	Random	0	0	0	0	Good	LFT	2017-09-13	SO-2017.1	0
SO_C_20170719_R_0719.JPG	2017-07-19 12:57:33	58.42597778	-135.9941167	218	Random	0	0	0	0	Good	LFT	2017-09-13	SO-2017.1	0
SO_C_20170719_R_0720.JPG	2017-07-19 12:57:34	58.42598333	-135.9933111	218	Random	0	0	0	0	Good	LFT	2017-09-13	SO-2017.1	0
SO_C_20170719_R_0721.JPG	2017-07-19 12:57:35	58.42598611	-135.9925056	219	Random	0	0	0	0	Good	LFT	2017-09-13	SO-2017.1	0
SO_C_20170719_R_0722.JPG	2017-07-19 12:57:36	58.42598889	-135.9917056	220	Random	0	0	0	0	Good	LFT	2017-09-13	SO-2017.1	0
SO_C_20170719_R_0723.JPG	2017-07-19 12:57:37	58.42599167	-135.9909083	222	Random	0	0	0	0	Good	LFT	2017-09-13	SO-2017.1	0
SO_C_20170719_R_0724.JPG	2017-07-19 12:57:38	58.42599167	-135.9901111	221	Random	0	0	1	0	Good	LFT	2017-09-13	SO-2017.1	0
SO_C_20170719_R_0725.JPG	2017-07-19 12:57:39	58.42599167	-135.9893139	221	Random	0	0	1	0	Good	LFT	2017-09-13	SO-2017.1	0
SO_C_20170719_R_0726.JPG	2017-07-19 12:57:40	58.42599444	-135.9885167	221	Random	0	0	0	0	Good	LFT	2017-09-13	SO-2017.1	0
SO_C_20170719_R_0727.JPG	2017-07-19 12:57:41	58.42599722	-135.9877167	221	Random	0	0	0	0	Good	LFT	2017-09-13	SO-2017.1	0
SO_C_20170719_R_0728.JPG	2017-07-19 12:57:42	58.42600278	-135.9869167	221	Random	0	0	0	0	Good	LFT	2017-09-13	SO-2017.1	0
SO_C_20170719_R_0729.JPG	2017-07-19 12:57:43	58.42600833	-135.9861139	221	Random	0	0	0	0	Good	LFT	2017-09-13	SO-2017.1	0
SO_C_20170719_R_0730.JPG	2017-07-19 12:57:44	58.42601389	-135.9853111	222	Random	0	0	0	0	Good	LFT	2017-09-13	SO-2017.1	0
SO_C_20170719_R_0731.JPG	2017-07-19 12:57:45	58.42601667	-135.9845083	221	Random	0	0	0	0	Good	LFT	2017-09-13	SO-2017.1	0
SO_C_20170719_R_0732.JPG	2017-07-19 12:57:46	58.42601944	-135.9837056	221	Random	0	0	0	0	Good	LFT	2017-09-13	SO-2017.1	0
SO_C_20170719_R_0733.JPG	2017-07-19 12:57:47	58.42602222	-135.9829	220	Random	0	0	0	0	Good	LFT	2017-09-13	SO-2017.1	0
SO_C_20170719_R_0734.JPG	2017-07-19 12:57:48	58.42602778	-135.9820917	219	Random	0	0	0	0	Good	LFT	2017-09-13	SO-2017.1	0
SO_C_20170719_R_0735.JPG	2017-07-19 12:57:49	58.42603333	-135.9812861	219	Random	1	0	0	0	Good	LFT	2017-09-26	SO-2017.1	0
SO_C_20170719_R_0736.JPG	2017-07-19 12:57:50	58.42603611	-135.9804778	219	Random	0	0	0	0	Good	LFT	2017-09-13	SO-2017.1	0
SO_C_20170719_R_0737.JPG	2017-07-19 12:57:51	58.42604167	-135.9796722	219	Random	0	0	1	0	Good	LFT	2017-09-13	SO-2017.1	0
SO_C_20170719_R_0738.JPG	2017-07-19 12:57:52	58.42604722	-135.9788667	218	Random	0	0	0	0	Good	LFT	2017-09-13	SO-2017.1	0
SO_C_20170719_R_0739.JPG	2017-07-19 12:57:53	58.42605278	-135.9780639	219	Random	0	0	0	0	Good	LFT	2017-09-13	SO-2017.1	0
SO_C_20170719_R_0740.JPG	2017-07-19 12:57:54	58.42606111	-135.9772611	218	Random	0	0	0	0	Good	LFT	2017-09-13	SO-2017.1	0
SO_C_20170719_R_0741.JPG	2017-07-19 12:57:55	58.42607222	-135.9764611	219	Random	0	0	0	0	Good	LFT	2017-09-13	SO-2017.1	0
SO_C_20170719_R_0742.JPG	2017-07-19 12:57:56	58.42608611	-135.9756667	220	Random	0	0	0	0	Good	LFT	2017-09-13	SO-2017.1	0
SO_C_20170719_R_0743.JPG	2017-07-19 12:57:57	58.42610278	-135.9748722	220	Random	0	0	0	0	Good	LFT	2017-09-13	SO-2017.1	0
SO_C_20170719_R_0744.JPG	2017-07-19 12:57:58	58.42612222	-135.9740806	221	Random	0	0	0	0	Good	LFT	2017-09-13	SO-2017.1	0
SO_C_20170719_R_0745.JPG	2017-07-19 12:57:59	58.42614444	-135.9732917	222	Random	0	0	0	0	Good	LFT	2017-09-13	SO-2017.1	0
SO_C_20170719_R_0746.JPG	2017-07-19 12:58:00	58.42616667	-135.9725	221	Random	0	0	0	0	Good	LFT	2017-09-13	SO-2017.1	0
SO_C_20170719_R_0747.JPG	2017-07-19 12:58:01	58.42619167	-135.9717083	221	Random	0	0	0	0	Good	LFT	2017-09-13	SO-2017.1	0
SO_C_20170719_R_0748.JPG	2017-07-19 12:58:02	58.42621667	-135.9709167	221	Random	0	0	0	0	Good	LFT	2017-09-13	SO-2017.1	0
SO_C_20170719_R_0749.JPG	2017-07-19 12:58:03	58.42623889	-135.970125	221	Random	0	0	0	0	Good	LFT	2017-09-13	SO-2017.1	0
SO_C_20170719_R_0750.JPG	2017-07-19 12:58:04	58.42625833	-135.9693278	220	Random	0	0	0	0	Good	LFT	2017-09-13	SO-2017.1	0
SO_C_20170719_R_0751.JPG	2017-07-19 12:58:05	58.42627778	-135.9685306	219	Random	0	0	1	0	Good	LFT	2017-09-13	SO-2017.1	0
SO_C_20170719_R_0752.JPG	2017-07-19 12:58:06	58.42629444	-135.9677278	219	Random	0	0	1	0	Good	LFT	2017-09-13	SO-2017.1	0
SO_C_20170719_R_0753.JPG	2017-07-19 12:58:07	58.42630556	-135.966925	218	Random	0	0	0	0	Good	LFT	2017-09-13	SO-2017.1	0
SO_C_20170719_R_0754.JPG	2017-07-19 12:58:08	58.42631667	-135.9661194	218	Random	0	0	0	0	Good	LFT	2017-09-13	SO-2017.1	0
SO_C_20170719_R_0755.JPG	2017-07-19 12:58:09	58.426325	-135.9653111	218	Random	0	0	0	0	Good	LFT	2017-09-13	SO-2017.1	0
SO_C_20170719_R_0756.JPG	2017-07-19 12:58:10	58.42633056	-135.9645	217	Random	0	0	0	0	Good	LFT	2017-09-13	SO-2017.1	0
SO_C_20170719_R_0757.JPG	2017-07-19 12:58:11	58.42633333	-135.9636917	216	Random	0	0	0	0	Good	LFT	2017-09-13	SO-2017.1	0
SO_C_20170719_R_0758.JPG	2017-07-19 12:58:12	58.42633333	-135.9628806	216	Random	0	0	0	0	Good	LFT	2017-09-13	SO-2017.1	0
SO_C_20170719_R_0759.JPG	2017-07-19 12:58:13	58.42633333	-135.9620722	216	Random	0	0	0	0	Good	LFT	2017-09-13	SO-2017.1	0
SO_C_20170719_R_0760.JPG	2017-07-19 12:58:14	58.42632778	-135.9612639	217	Random	0	0	0	0	Good	LFT	2017-09-13	SO-2017.1	0
SO_C_20170719_R_0761.JPG	2017-07-19 12:58:15	58.42632222	-135.9604583	217	Random	0	0	0	0	Good	LFT	2017-09-13	SO-2017.1	0
SO_C_20170719_R_0762.JPG	2017-07-19 12:58:16	58.42631667	-135.9596528	217	Random	0	0	0	0	Good	LFT	2017-09-13	SO-2017.1	0
SO_C_20170719_R_0763.JPG	2017-07-19 12:58:17	58.42631389	-135.95885	217	Random	0	0	0	0	Good	LFT	2017-09-13	SO-2017.1	0
SO_C_20170719_R_0764.JPG	2017-07-19 12:58:18	58.42630833	-135.95805	218	Random	0	0	0	0	Good	LFT	2017-09-13	SO-2017.1	0
SO_C_20170719_R_0765.JPG	2017-07-19 12:58:19	58.42630556	-135.9572528	219	Random	0	0	0	0	Good	LFT	2017-09-13	SO-2017.1	0
SO_C_20170719_R_0766.JPG	2017-07-19 12:58:20	58.42630556	-135.9564556	219	Random	0	0	0	0	Good	LFT	2017-09-13	SO-2017.1	0
SO_C_20170719_R_0767.JPG	2017-07-19 12:58:21	58.42630278	-135.9556583	220	Random	0	0	0	0	Good	LFT	2017-09-13	SO-2017.1	0
SO_C_20170719_R_0768.JPG	2017-07-19 12:58:22	58.42630556	-135.9548611	220	Random	0	0	0	0	Good	LFT	2017-09-13	SO-2017.1	0
SO_C_20170719_R_0769.JPG	2017-07-19 12:58:23	58.42631111	-135.9540639	221	Random	0	0	1	0	Good	LFT	2017-09-13	SO-2017.1	0
SO_C_20170719_R_0770.JPG	2017-07-19 12:58:24	58.42631667	-135.9532667	221	Random	0	0	1	0	Good	LFT	2017-09-13	SO-2017.1	0
SO_C_20170719_R_0771.JPG	2017-07-19 12:58:25	58.42632778	-135.9524694	221	Random	0	0	0	0	Good	LFT	2017-09-13	SO-2017.1	0
SO_C_20170719_R_0772.JPG	2017-07-19 12:58:26	58.42633611	-135.9516694	221	Random	0	0	1	0	Good	LFT	2017-09-13	SO-2017.1	0
SO_C_20170719_R_0773.JPG	2017-07-19 12:58:27	58.42634444	-135.9508694	221	Random	0	0	1	0	Good	LFT	2017-09-13	SO-2017.1	0
SO_C_20170719_R_0774.JPG	2017-07-19 12:58:28	58.42635278	-135.9500667	221	Random	0	0	0	0	Good	LFT	2017-09-13	SO-2017.1	0
SO_C_20170719_R_0775.JPG	2017-07-19 12:58:29	58.42636111	-135.9492639	220	Random	0	0	1	0	Good	LFT	2017-09-13	SO-2017.1	0
SO_C_20170719_R_0776.JPG	2017-07-19 12:58:30	58.42636389	-135.9484556	220	Random	0	0	1	0	Good	LFT	2017-09-13	SO-2017.1	0
SO_C_20170719_R_0777.JPG	2017-07-19 12:58:31	58.42636944	-135.9476472	219	Random	0	0	1	0	Good	LFT	2017-09-13	SO-2017.1	0
SO_C_20170719_R_0778.JPG	2017-07-19 12:58:32	58.42637222	-135.9468389	219	Random	0	0	1	0	Good	LFT	2017-09-13	SO-2017.1	0
SO_C_20170719_R_0779.JPG	2017-07-19 12:58:33	58.426375	-135.946025	219	Random	0	0	0	0	Good	LFT	2017-09-13	SO-2017.1	0
SO_C_20170719_R_0780.JPG	2017-07-19 12:58:34	58.42638056	-135.9452111	219	Random	0	0	0	0	Good	LFT	2017-09-13	SO-2017.1	0
SO_C_20170719_R_0781.JPG	2017-07-19 12:58:35	58.42638056	-135.9443944	218	Random	0	0	1	0	Good	LFT	2017-09-13	SO-2017.1	0
SO_C_20170719_R_0782.JPG	2017-07-19 12:58:36	58.42638333	-135.943575	218	Random	0	0	1	0	Good	LFT	2017-09-13	SO-2017.1	0
SO_C_20170719_R_0783.JPG	2017-07-19 12:58:37	58.42638333	-135.9427556	218	Random	0	0	0	0	Good	LFT	2017-09-13	SO-2017.1	0
SO_C_20170719_R_0784.JPG	2017-07-19 12:58:38	58.42638333	-135.9419361	218	Random	0	0	0	0	Good	LFT	2017-09-13	SO-2017.1	0
SO_C_20170719_R_0785.JPG	2017-07-19 12:58:39	58.42638333	-135.9411139	218	Random	0	0	0	0	Good	LFT	2017-09-13	SO-2017.1	0
SO_C_20170719_R_0786.JPG	2017-07-19 12:58:40	58.42638056	-135.9402944	218	Random	0	0	0	0	Good	LFT	2017-09-13	SO-2017.1	0
SO_C_20170719_R_0787.JPG	2017-07-19 12:58:41	58.42638056	-135.939475	219	Random	0	0	0	0	Good	LFT	2017-09-13	SO-2017.1	0
SO_C_20170719_R_0788.JPG	2017-07-19 12:58:42	58.42638056	-135.9386556	219	Random	0	0	0	0	Good	LFT	2017-09-13	SO-2017.1	0
SO_C_20170719_R_0789.JPG	2017-07-19 12:58:43	58.42638056	-135.9378361	219	Random	0	0	0	0	Good	LFT	2017-09-13	SO-2017.1	0
SO_C_20170719_R_0790.JPG	2017-07-19 12:58:44	58.42638056	-135.9370167	220	Random	0	0	0	0	Good	LFT	2017-09-13	SO-2017.1	0
SO_C_20170719_R_0791.JPG	2017-07-19 12:58:45	58.42638056	-135.9361972	220	Random	0	0	0	0	Good	LFT	2017-09-13	SO-2017.1	0
SO_C_20170719_R_0792.JPG	2017-07-19 12:58:46	58.42638333	-135.9353778	221	Random	0	0	0	0	Good	LFT	2017-09-13	SO-2017.1	0
SO_C_20170719_R_0793.JPG	2017-07-19 12:58:47	58.42638611	-135.9345611	222	Random	0	0	0	0	Good	LFT	2017-09-13	SO-2017.1	0
SO_C_20170719_R_0794.JPG	2017-07-19 12:58:48	58.42639444	-135.9337417	222	Random	0	0	0	0	Good	LFT	2017-09-13	SO-2017.1	0
SO_C_20170719_R_0795.JPG	2017-07-19 12:58:49	58.42640556	-135.9329278	223	Random	0	0	0	0	Good	LFT	2017-09-13	SO-2017.1	0
SO_C_20170719_R_0796.JPG	2017-07-19 12:58:50	58.42641944	-135.9321111	224	Random	0	0	0	0	Good	LFT	2017-09-13	SO-2017.1	0
SO_C_20170719_R_0797.JPG	2017-07-19 12:58:51	58.42643611	-135.9313	225	Random	0	0	0	0	Good	LFT	2017-09-13	SO-2017.1	0
SO_C_20170719_R_0798.JPG	2017-07-19 12:58:52	58.42645833	-135.9304861	226	Random	0	0	0	0	Good	LFT	2017-09-13	SO-2017.1	0
SO_C_20170719_R_0799.JPG	2017-07-19 12:58:53	58.42648056	-135.9296722	226	Random	0	0	0	0	Good	LFT	2017-09-13	SO-2017.1	0
SO_C_20170719_R_0800.JPG	2017-07-19 12:58:54	58.42650278	-135.9288556	226	Random	0	0	0	0	Good	LFT	2017-09-13	SO-2017.1	0
SO_C_20170719_R_0801.JPG	2017-07-19 12:58:55	58.426525	-135.9280361	226	Random	0	0	0	0	Good	LFT	2017-09-13	SO-2017.1	0
SO_C_20170719_R_0802.JPG	2017-07-19 12:58:56	58.42654722	-135.9272139	225	Random	0	0	0	0	Good	LFT	2017-09-13	SO-2017.1	0
SO_C_20170719_R_0803.JPG	2017-07-19 12:58:57	58.42656389	-135.9263889	224	Random	0	0	0	0	Good	LFT	2017-09-13	SO-2017.1	0
SO_C_20170719_R_0804.JPG	2017-07-19 12:58:58	58.42658333	-135.9255611	224	Random	0	0	0	0	Good	LFT	2017-09-13	SO-2017.1	0
SO_C_20170719_R_0805.JPG	2017-07-19 12:58:59	58.4266	-135.9247306	223	Random	0	0	0	0	Good	LFT	2017-09-13	SO-2017.1	0
SO_C_20170719_R_0806.JPG	2017-07-19 12:59:00	58.42661389	-135.9239	222	Random	0	0	0	0	Good	LFT	2017-09-13	SO-2017.1	0
SO_C_20170719_R_0807.JPG	2017-07-19 12:59:01	58.42663056	-135.9230667	221	Random	0	0	0	0	Good	LFT	2017-09-13	SO-2017.1	0
SO_C_20170719_R_0808.JPG	2017-07-19 12:59:02	58.42664167	-135.9222306	221	Random	0	0	0	0	Good	LFT	2017-09-13	SO-2017.1	0
SO_C_20170719_R_0809.JPG	2017-07-19 12:59:03	58.42665	-135.9213944	221	Random	0	0	0	0	Good	LFT	2017-09-13	SO-2017.1	0
SO_C_20170719_R_0810.JPG	2017-07-19 12:59:04	58.42665833	-135.9205583	220	Random	0	0	0	0	Good	LFT	2017-09-13	SO-2017.1	0
SO_C_20170719_R_0811.JPG	2017-07-19 12:59:05	58.42666111	-135.9197222	221	Random	0	0	0	0	Good	LFT	2017-09-13	SO-2017.1	0
SO_C_20170719_R_0812.JPG	2017-07-19 12:59:06	58.42666389	-135.9188889	221	Random	0	0	0	0	Good	LFT	2017-09-13	SO-2017.1	0
SO_C_20170719_R_0813.JPG	2017-07-19 12:59:07	58.42666111	-135.9180556	222	Random	0	0	0	0	Good	LFT	2017-09-13	SO-2017.1	0
SO_C_20170719_R_0814.JPG	2017-07-19 12:59:08	58.42666389	-135.917225	222	Random	0	0	0	0	Good	LFT	2017-09-13	SO-2017.1	0
SO_C_20170719_R_0815.JPG	2017-07-19 12:59:09	58.42666667	-135.9163944	223	Random	0	0	0	0	Good	LFT	2017-09-13	SO-2017.1	0
SO_C_20170719_R_0816.JPG	2017-07-19 12:59:10	58.42667222	-135.9155667	224	Random	0	0	0	0	Good	LFT	2017-09-13	SO-2017.1	0
SO_C_20170719_R_0817.JPG	2017-07-19 12:59:11	58.42667778	-135.9147417	225	Random	0	0	0	0	Good	LFT	2017-09-13	SO-2017.1	0
SO_C_20170719_R_0818.JPG	2017-07-19 12:59:12	58.42668611	-135.9139194	226	Random	0	0	0	0	Good	LFT	2017-09-13	SO-2017.1	0
SO_C_20170719_R_0819.JPG	2017-07-19 12:59:13	58.42669444	-135.9130972	227	Random	0	0	0	0	Good	LFT	2017-09-13	SO-2017.1	0
SO_C_20170719_R_0820.JPG	2017-07-19 12:59:14	58.42670278	-135.9122722	226	Random	0	0	0	0	Good	LFT	2017-09-13	SO-2017.1	0
SO_C_20170719_R_0821.JPG	2017-07-19 12:59:15	58.42671111	-135.9114444	226	Random	0	0	0	0	Good	LFT	2017-09-13	SO-2017.1	0
SO_C_20170719_R_0822.JPG	2017-07-19 12:59:16	58.42672222	-135.9106167	226	Random	0	0	0	0	Good	LFT	2017-09-13	SO-2017.1	0
SO_C_20170719_R_0823.JPG	2017-07-19 12:59:17	58.42673333	-135.9097806	224	Random	0	0	1	0	Good	LFT	2017-09-13	SO-2017.1	0
SO_C_20170719_R_0824.JPG	2017-07-19 12:59:18	58.42674444	-135.9089417	223	Random	0	0	1	0	Good	LFT	2017-09-13	SO-2017.1	0
SO_C_20170719_R_0825.JPG	2017-07-19 12:59:19	58.42675278	-135.9080972	222	Random	0	0	1	1	Good	LFT	2017-09-13	SO-2017.1	0
SO_C_20170719_R_0826.JPG	2017-07-19 12:59:20	58.42675833	-135.90725	221	Random	0	0	0	1	Good	LFT	2017-09-13	SO-2017.1	0
SO_C_20170719_R_0827.JPG	2017-07-19 12:59:21	58.42676389	-135.9064	219	Random	0	0	0	1	Good	LFT	2017-09-13	SO-2017.1	0
SO_C_20170719_R_0828.JPG	2017-07-19 12:59:22	58.42676944	-135.9055472	219	Random	0	0	0	1	Good	LFT	2017-09-13	SO-2017.1	0
SO_C_20170719_R_0829.JPG	2017-07-19 13:00:46	58.43421389	-135.8943556	212	Random	0	0	0	1	Good	LFT	2017-09-13	SO-2017.1	0
SO_C_20170719_R_0830.JPG	2017-07-19 13:00:47	58.4342	-135.8951528	213	Random	0	0	0	1	Good	LFT	2017-09-13	SO-2017.1	0
SO_C_20170719_R_0831.JPG	2017-07-19 13:00:48	58.43420556	-135.89595	214	Random	0	0	0	1	Good	LFT	2017-09-13	SO-2017.1	0
SO_C_20170719_R_0832.JPG	2017-07-19 13:00:49	58.43422778	-135.89675	214	Random	0	0	1	1	Good	LFT	2017-09-13	SO-2017.1	0
SO_C_20170719_R_0833.JPG	2017-07-19 13:00:50	58.43425556	-135.8975444	216	Random	0	0	1	0	Good	LFT	2017-09-13	SO-2017.1	0
SO_C_20170719_R_0834.JPG	2017-07-19 13:00:51	58.43428889	-135.8983389	217	Random	0	0	1	0	Good	LFT	2017-09-13	SO-2017.1	0
SO_C_20170719_R_0835.JPG	2017-07-19 13:00:52	58.43432222	-135.8991306	219	Random	0	0	1	0	Good	LFT	2017-09-13	SO-2017.1	0
SO_C_20170719_R_0836.JPG	2017-07-19 13:00:53	58.43435278	-135.8999194	222	Random	0	0	0	0	Good	LFT	2017-09-13	SO-2017.1	0
SO_C_20170719_R_0837.JPG	2017-07-19 13:00:54	58.43438333	-135.9007083	223	Random	0	0	0	0	Good	LFT	2017-09-13	SO-2017.1	0
SO_C_20170719_R_0838.JPG	2017-07-19 13:00:55	58.43440833	-135.9015	224	Random	0	0	0	0	Good	LFT	2017-09-13	SO-2017.1	0
SO_C_20170719_R_0839.JPG	2017-07-19 13:00:56	58.43442778	-135.9022944	225	Random	0	0	0	0	Good	LFT	2017-09-13	SO-2017.1	0
SO_C_20170719_R_0840.JPG	2017-07-19 13:00:57	58.43444167	-135.9030972	225	Random	0	0	0	0	Good	LFT	2017-09-13	SO-2017.1	0
SO_C_20170719_R_0841.JPG	2017-07-19 13:00:58	58.43445	-135.9039111	224	Random	0	0	0	0	Good	LFT	2017-09-13	SO-2017.1	0
SO_C_20170719_R_0842.JPG	2017-07-19 13:00:59	58.43445278	-135.904725	222	Random	0	0	0	0	Good	LFT	2017-09-13	SO-2017.1	0
SO_C_20170719_R_0843.JPG	2017-07-19 13:01:00	58.43445	-135.9055444	221	Random	0	0	0	0	Good	LFT	2017-09-13	SO-2017.1	0
SO_C_20170719_R_0844.JPG	2017-07-19 13:01:01	58.43444444	-135.9063694	221	Random	0	0	0	0	Good	LFT	2017-09-13	SO-2017.1	0
SO_C_20170719_R_0845.JPG	2017-07-19 13:01:02	58.43442778	-135.9072	219	Random	0	0	0	0	Good	LFT	2017-09-13	SO-2017.1	0
SO_C_20170719_R_0846.JPG	2017-07-19 13:01:03	58.43440556	-135.9080306	219	Random	0	0	0	0	Good	LFT	2017-09-13	SO-2017.1	0
SO_C_20170719_R_0847.JPG	2017-07-19 13:01:04	58.43437778	-135.9088611	219	Random	0	0	0	0	Good	LFT	2017-09-13	SO-2017.1	0
SO_C_20170719_R_0848.JPG	2017-07-19 13:01:05	58.43434722	-135.9096944	219	Random	0	0	0	0	Good	LFT	2017-09-13	SO-2017.1	0
SO_C_20170719_R_0849.JPG	2017-07-19 13:01:06	58.43431111	-135.910525	220	Random	0	0	0	0	Good	LFT	2017-09-13	SO-2017.1	0
SO_C_20170719_R_0850.JPG	2017-07-19 13:01:07	58.43427222	-135.9113528	221	Random	0	0	0	0	Good	LFT	2017-09-13	SO-2017.1	0
SO_C_20170719_R_0851.JPG	2017-07-19 13:01:08	58.43423333	-135.9121806	221	Random	0	0	0	0	Good	LFT	2017-09-13	SO-2017.1	0
SO_C_20170719_R_0852.JPG	2017-07-19 13:01:09	58.43419444	-135.9130056	222	Random	0	0	0	0	Good	LFT	2017-09-13	SO-2017.1	0
SO_C_20170719_R_0853.JPG	2017-07-19 13:01:10	58.43415278	-135.9138306	223	Random	0	0	0	0	Good	LFT	2017-09-13	SO-2017.1	0
SO_C_20170719_R_0854.JPG	2017-07-19 13:01:11	58.43411389	-135.9146528	223	Random	0	0	0	0	Good	LFT	2017-09-13	SO-2017.1	0
SO_C_20170719_R_0855.JPG	2017-07-19 13:01:12	58.434075	-135.915475	224	Random	0	0	0	0	Good	LFT	2017-09-13	SO-2017.1	0
SO_C_20170719_R_0856.JPG	2017-07-19 13:01:13	58.43403889	-135.9162972	225	Random	0	0	0	0	Good	LFT	2017-09-13	SO-2017.1	0
SO_C_20170719_R_0857.JPG	2017-07-19 13:01:14	58.43400833	-135.9171222	226	Random	0	0	0	0	Good	LFT	2017-09-13	SO-2017.1	0
SO_C_20170719_R_0858.JPG	2017-07-19 13:01:15	58.43398611	-135.9179472	227	Random	0	0	0	0	Good	LFT	2017-09-13	SO-2017.1	0
SO_C_20170719_R_0859.JPG	2017-07-19 13:01:16	58.43397222	-135.918775	227	Random	0	0	0	0	Good	LFT	2017-09-13	SO-2017.1	0
SO_C_20170719_R_0860.JPG	2017-07-19 13:01:17	58.43396389	-135.9196111	226	Random	0	0	0	0	Good	LFT	2017-09-13	SO-2017.1	0
SO_C_20170719_R_0861.JPG	2017-07-19 13:01:18	58.43396389	-135.92045	226	Random	0	0	0	0	Good	LFT	2017-09-13	SO-2017.1	0
SO_C_20170719_R_0862.JPG	2017-07-19 13:01:19	58.43396667	-135.9212972	224	Random	0	0	0	0	Good	LFT	2017-09-13	SO-2017.1	0
SO_C_20170719_R_0863.JPG	2017-07-19 13:01:20	58.43396944	-135.9221472	223	Random	0	0	0	0	Good	LFT	2017-09-13	SO-2017.1	0
SO_C_20170719_R_0864.JPG	2017-07-19 13:01:21	58.433975	-135.9230028	222	Random	0	0	0	0	Good	LFT	2017-09-13	SO-2017.1	0
SO_C_20170719_R_0865.JPG	2017-07-19 13:01:22	58.43398056	-135.9238611	222	Random	0	0	0	0	Good	LFT	2017-09-13	SO-2017.1	0
SO_C_20170719_R_0866.JPG	2017-07-19 13:01:23	58.43398333	-135.9247222	222	Random	0	0	0	0	Good	LFT	2017-09-13	SO-2017.1	0
SO_C_20170719_R_0867.JPG	2017-07-19 13:01:24	58.43398889	-135.9255833	222	Random	0	0	0	0	Good	LFT	2017-09-13	SO-2017.1	0
SO_C_20170719_R_0868.JPG	2017-07-19 13:01:25	58.43399167	-135.9264472	223	Random	0	0	0	0	Good	LFT	2017-09-13	SO-2017.1	0
SO_C_20170719_R_0869.JPG	2017-07-19 13:01:26	58.43399167	-135.9273083	223	Random	0	0	0	0	Good	LFT	2017-09-13	SO-2017.1	0
SO_C_20170719_R_0870.JPG	2017-07-19 13:01:27	58.43399167	-135.9281667	224	Random	0	0	0	0	Good	LFT	2017-09-13	SO-2017.1	0
SO_C_20170719_R_0871.JPG	2017-07-19 13:01:28	58.43398889	-135.929025	225	Random	0	0	1	0	Good	LFT	2017-09-13	SO-2017.1	0
SO_C_20170719_R_0872.JPG	2017-07-19 13:01:29	58.43398611	-135.9298833	226	Random	0	0	1	0	Good	LFT	2017-09-13	SO-2017.1	0
SO_C_20170719_R_0873.JPG	2017-07-19 13:01:30	58.43398056	-135.9307389	226	Random	0	0	0	0	Good	LFT	2017-09-13	SO-2017.1	0
SO_C_20170719_R_0874.JPG	2017-07-19 13:01:31	58.433975	-135.9315944	227	Random	0	0	0	0	Good	LFT	2017-09-13	SO-2017.1	0
SO_C_20170719_R_0875.JPG	2017-07-19 13:01:32	58.43396667	-135.93245	227	Random	0	0	0	0	Good	LFT	2017-09-13	SO-2017.1	0
SO_C_20170719_R_0876.JPG	2017-07-19 13:01:33	58.43395833	-135.9333056	227	Random	0	0	0	0	Good	LFT	2017-09-13	SO-2017.1	0
SO_C_20170719_R_0877.JPG	2017-07-19 13:01:34	58.43395	-135.9341611	228	Random	0	0	0	0	Good	LFT	2017-09-13	SO-2017.1	0
SO_C_20170719_R_0878.JPG	2017-07-19 13:01:35	58.43394167	-135.9350222	227	Random	0	0	0	0	Good	LFT	2017-09-13	SO-2017.1	0
SO_C_20170719_R_0879.JPG	2017-07-19 13:01:36	58.43393889	-135.9358833	228	Random	0	0	0	0	Good	LFT	2017-09-13	SO-2017.1	0
SO_C_20170719_R_0880.JPG	2017-07-19 13:01:37	58.43393333	-135.9367472	228	Random	0	0	0	0	Good	LFT	2017-09-13	SO-2017.1	0
SO_C_20170719_R_0881.JPG	2017-07-19 13:01:38	58.43393056	-135.9376139	228	Random	0	0	0	0	Good	LFT	2017-09-13	SO-2017.1	0
SO_C_20170719_R_0882.JPG	2017-07-19 13:01:39	58.43392778	-135.9384806	228	Random	0	0	1	0	Good	LFT	2017-09-13	SO-2017.1	0
SO_C_20170719_R_0883.JPG	2017-07-19 13:01:40	58.43392222	-135.9393472	228	Random	0	0	0	0	Good	LFT	2017-09-13	SO-2017.1	0
SO_C_20170719_R_0884.JPG	2017-07-19 13:01:41	58.43391667	-135.9402194	227	Random	0	0	1	0	Good	LFT	2017-09-13	SO-2017.1	0
SO_C_20170719_R_0885.JPG	2017-07-19 13:01:42	58.43391389	-135.9410944	227	Random	0	0	1	0	Good	LFT	2017-09-13	SO-2017.1	0
SO_C_20170719_R_0886.JPG	2017-07-19 13:01:43	58.43391111	-135.941975	227	Random	0	0	1	0	Good	LFT	2017-09-13	SO-2017.1	0
SO_C_20170719_R_0887.JPG	2017-07-19 13:01:44	58.43390833	-135.9428583	226	Random	0	0	0	0	Good	LFT	2017-09-13	SO-2017.1	0
SO_C_20170719_R_0888.JPG	2017-07-19 13:01:45	58.43391111	-135.9437444	224	Random	0	0	0	0	Good	LFT	2017-09-13	SO-2017.1	0
SO_C_20170719_R_0889.JPG	2017-07-19 13:01:46	58.43391111	-135.9446306	223	Random	0	0	0	0	Good	LFT	2017-09-13	SO-2017.1	0
SO_C_20170719_R_0890.JPG	2017-07-19 13:01:47	58.43391111	-135.9455194	221	Random	0	0	0	0	Good	LFT	2017-09-13	SO-2017.1	0
SO_C_20170719_R_0891.JPG	2017-07-19 13:01:48	58.43390833	-135.9464028	221	Random	0	0	0	0	Good	LFT	2017-09-13	SO-2017.1	0
SO_C_20170719_R_0892.JPG	2017-07-19 13:01:49	58.43390833	-135.9472889	220	Random	0	0	0	0	Good	LFT	2017-09-13	SO-2017.1	0
SO_C_20170719_R_0893.JPG	2017-07-19 13:01:50	58.43390278	-135.9481694	221	Random	0	0	0	0	Good	LFT	2017-09-13	SO-2017.1	0
SO_C_20170719_R_0894.JPG	2017-07-19 13:01:51	58.43389722	-135.9490472	221	Random	0	0	0	0	Good	LFT	2017-09-13	SO-2017.1	0
SO_C_20170719_R_0895.JPG	2017-07-19 13:01:52	58.43389167	-135.9499194	222	Random	0	0	0	0	Good	LFT	2017-09-13	SO-2017.1	0
SO_C_20170719_R_0896.JPG	2017-07-19 13:01:53	58.43388611	-135.9507861	221	Random	0	0	0	0	Good	LFT	2017-09-13	SO-2017.1	0
SO_C_20170719_R_0897.JPG	2017-07-19 13:01:54	58.43388056	-135.9516528	222	Random	0	0	0	0	Good	LFT	2017-09-13	SO-2017.1	0
SO_C_20170719_R_0898.JPG	2017-07-19 13:01:55	58.43387778	-135.9525167	222	Random	0	0	0	0	Good	LFT	2017-09-13	SO-2017.1	0
SO_C_20170719_R_0899.JPG	2017-07-19 13:01:56	58.433875	-135.953375	221	Random	0	0	0	0	Good	LFT	2017-09-13	SO-2017.1	0
SO_C_20170719_R_0900.JPG	2017-07-19 13:01:57	58.433875	-135.9542333	221	Random	0	0	0	0	Good	LFT	2017-09-13	SO-2017.1	0
SO_C_20170719_R_0901.JPG	2017-07-19 13:01:58	58.43387222	-135.9550861	222	Random	0	0	0	0	Good	LFT	2017-09-13	SO-2017.1	0
SO_C_20170719_R_0902.JPG	2017-07-19 13:01:59	58.43386944	-135.9559389	221	Random	0	0	0	0	Good	LFT	2017-09-13	SO-2017.1	0
SO_C_20170719_R_0903.JPG	2017-07-19 13:02:00	58.43386944	-135.9567889	221	Random	0	0	0	0	Good	LFT	2017-09-13	SO-2017.1	0
SO_C_20170719_R_0904.JPG	2017-07-19 13:02:01	58.43386944	-135.9576389	220	Random	0	0	0	0	Good	LFT	2017-09-13	SO-2017.1	0
SO_C_20170719_R_0905.JPG	2017-07-19 13:02:02	58.43386944	-135.9584889	220	Random	0	0	0	0	Good	LFT	2017-09-13	SO-2017.1	0
SO_C_20170719_R_0906.JPG	2017-07-19 13:02:03	58.43386944	-135.9593417	220	Random	0	0	0	0	Good	LFT	2017-09-13	SO-2017.1	0
SO_C_20170719_R_0907.JPG	2017-07-19 13:02:04	58.43386944	-135.9601917	218	Random	0	0	0	0	Good	LFT	2017-09-13	SO-2017.1	0
SO_C_20170719_R_0908.JPG	2017-07-19 13:02:05	58.43386944	-135.9610417	217	Random	0	0	0	0	Good	LFT	2017-09-13	SO-2017.1	0
SO_C_20170719_R_0909.JPG	2017-07-19 13:02:06	58.43386667	-135.9618917	216	Random	0	0	0	0	Good	LFT	2017-09-13	SO-2017.1	0
SO_C_20170719_R_0910.JPG	2017-07-19 13:02:07	58.43386667	-135.9627417	216	Random	0	0	0	0	Good	LFT	2017-09-13	SO-2017.1	0
SO_C_20170719_R_0911.JPG	2017-07-19 13:02:08	58.43386389	-135.9635889	216	Random	0	0	0	0	Good	LFT	2017-09-13	SO-2017.1	0
SO_C_20170719_R_0912.JPG	2017-07-19 13:02:09	58.43386111	-135.9644361	215	Random	0	0	0	0	Good	LFT	2017-09-13	SO-2017.1	0
SO_C_20170719_R_0913.JPG	2017-07-19 13:02:10	58.43385833	-135.9652806	214	Random	0	0	1	0	Good	LFT	2017-09-13	SO-2017.1	0
SO_C_20170719_R_0914.JPG	2017-07-19 13:02:11	58.43385833	-135.966125	215	Random	0	0	1	0	Good	LFT	2017-09-13	SO-2017.1	0
SO_C_20170719_R_0915.JPG	2017-07-19 13:02:12	58.43385833	-135.9669639	214	Random	0	0	1	0	Good	LFT	2017-09-13	SO-2017.1	0
SO_C_20170719_R_0916.JPG	2017-07-19 13:02:13	58.43385833	-135.9677972	215	Random	0	0	1	0	Good	LFT	2017-09-13	SO-2017.1	0
SO_C_20170719_R_0917.JPG	2017-07-19 13:02:14	58.43385556	-135.9686278	216	Random	0	0	1	0	Good	LFT	2017-09-13	SO-2017.1	0
SO_C_20170719_R_0918.JPG	2017-07-19 13:02:15	58.43385556	-135.96945	217	Random	0	0	0	0	Good	LFT	2017-09-13	SO-2017.1	0
SO_C_20170719_R_0919.JPG	2017-07-19 13:02:16	58.43385556	-135.9702694	219	Random	0	0	0	0	Good	LFT	2017-09-13	SO-2017.1	0
SO_C_20170719_R_0920.JPG	2017-07-19 13:02:17	58.43385556	-135.9710861	219	Random	0	0	0	0	Good	LFT	2017-09-13	SO-2017.1	0
SO_C_20170719_R_0921.JPG	2017-07-19 13:02:18	58.43385556	-135.9719	220	Random	0	0	1	0	Good	LFT	2017-09-13	SO-2017.1	0
SO_C_20170719_R_0922.JPG	2017-07-19 13:02:19	58.43386111	-135.9727139	221	Random	0	0	0	0	Good	LFT	2017-09-13	SO-2017.1	0
SO_C_20170719_R_0923.JPG	2017-07-19 13:02:20	58.43386667	-135.9735306	220	Random	0	0	0	0	Good	LFT	2017-09-13	SO-2017.1	0
SO_C_20170719_R_0924.JPG	2017-07-19 13:02:21	58.43387222	-135.97435	219	Random	0	0	0	0	Good	LFT	2017-09-13	SO-2017.1	0
SO_C_20170719_R_0925.JPG	2017-07-19 13:02:22	58.43387778	-135.9751722	218	Random	0	0	0	0	Good	LFT	2017-09-13	SO-2017.1	0
SO_C_20170719_R_0926.JPG	2017-07-19 13:02:23	58.43388056	-135.9759972	216	Random	0	0	0	0	Good	LFT	2017-09-13	SO-2017.1	0
SO_C_20170719_R_0927.JPG	2017-07-19 13:02:24	58.43388333	-135.9768278	215	Random	0	0	0	0	Good	LFT	2017-09-13	SO-2017.1	0
SO_C_20170719_R_0928.JPG	2017-07-19 13:02:25	58.43388333	-135.9776611	214	Random	0	0	0	0	Good	LFT	2017-09-13	SO-2017.1	0
SO_C_20170719_R_0929.JPG	2017-07-19 13:02:26	58.43387778	-135.9784944	214	Random	0	0	0	0	Good	LFT	2017-09-13	SO-2017.1	0
SO_C_20170719_R_0930.JPG	2017-07-19 13:02:27	58.43386667	-135.9793278	214	Random	0	0	0	0	Good	LFT	2017-09-13	SO-2017.1	0
SO_C_20170719_R_0931.JPG	2017-07-19 13:02:28	58.43385278	-135.9801611	214	Random	0	0	0	0	Good	LFT	2017-09-13	SO-2017.1	0
SO_C_20170719_R_0932.JPG	2017-07-19 13:02:29	58.43383611	-135.9809917	214	Random	0	0	0	0	Good	LFT	2017-09-13	SO-2017.1	0
SO_C_20170719_R_0933.JPG	2017-07-19 13:02:30	58.43382222	-135.9818194	213	Random	0	0	0	0	Good	LFT	2017-09-13	SO-2017.1	0
SO_C_20170719_R_0934.JPG	2017-07-19 13:02:31	58.43381111	-135.9826472	214	Random	0	0	0	0	Good	LFT	2017-09-13	SO-2017.1	0
SO_C_20170719_R_0935.JPG	2017-07-19 13:02:32	58.43379722	-135.9834722	214	Random	0	0	0	0	Good	LFT	2017-09-13	SO-2017.1	0
SO_C_20170719_R_0936.JPG	2017-07-19 13:02:33	58.43378611	-135.9842944	216	Random	0	0	0	0	Good	LFT	2017-09-13	SO-2017.1	0
SO_C_20170719_R_0937.JPG	2017-07-19 13:02:34	58.43377222	-135.9851111	216	Random	0	0	0	0	Good	LFT	2017-09-13	SO-2017.1	0
SO_C_20170719_R_0938.JPG	2017-07-19 13:02:35	58.43376111	-135.9859278	219	Random	0	0	0	0	Good	LFT	2017-09-13	SO-2017.1	0
SO_C_20170719_R_0939.JPG	2017-07-19 13:02:36	58.43375	-135.9867417	221	Random	0	0	0	0	Good	LFT	2017-09-13	SO-2017.1	0
SO_C_20170719_R_0940.JPG	2017-07-19 13:02:37	58.43373889	-135.9875556	221	Random	0	0	0	0	Good	LFT	2017-09-13	SO-2017.1	0
SO_C_20170719_R_0941.JPG	2017-07-19 13:02:38	58.43372778	-135.9883694	220	Random	0	0	0	0	Good	LFT	2017-09-13	SO-2017.1	0
SO_C_20170719_R_0942.JPG	2017-07-19 13:02:39	58.43371944	-135.9891861	220	Random	0	0	0	0	Good	LFT	2017-09-13	SO-2017.1	0
SO_C_20170719_R_0943.JPG	2017-07-19 13:02:40	58.43371389	-135.9900083	220	Random	0	0	0	0	Good	LFT	2017-09-13	SO-2017.1	0
SO_C_20170719_R_0944.JPG	2017-07-19 13:02:41	58.43371111	-135.9908333	219	Random	0	0	0	0	Good	LFT	2017-09-13	SO-2017.1	0
SO_C_20170719_R_0945.JPG	2017-07-19 13:02:42	58.43370556	-135.9916583	218	Random	0	0	0	0	Good	LFT	2017-09-13	SO-2017.1	0
SO_C_20170719_R_0946.JPG	2017-07-19 13:02:43	58.4337	-135.9924861	218	Random	0	0	0	0	Good	LFT	2017-09-13	SO-2017.1	0
SO_C_20170719_R_0947.JPG	2017-07-19 13:02:44	58.43369444	-135.9933139	217	Random	0	0	0	0	Good	LFT	2017-09-13	SO-2017.1	0
SO_C_20170719_R_0948.JPG	2017-07-19 13:02:45	58.43368889	-135.9941444	216	Random	0	0	0	0	Good	LFT	2017-09-13	SO-2017.1	0
SO_C_20170719_R_0949.JPG	2017-07-19 13:02:46	58.43368056	-135.9949778	216	Random	0	0	0	0	Good	LFT	2017-09-13	SO-2017.1	0
SO_C_20170719_R_0950.JPG	2017-07-19 13:02:47	58.43366944	-135.9958111	216	Random	0	0	0	0	Good	LFT	2017-09-13	SO-2017.1	0
SO_C_20170719_R_0951.JPG	2017-07-19 13:02:48	58.43366111	-135.9966444	216	Random	0	0	0	0	Good	LFT	2017-09-13	SO-2017.1	0
SO_C_20170719_R_0952.JPG	2017-07-19 13:02:49	58.43365556	-135.9974778	217	Random	0	0	0	0	Good	LFT	2017-09-13	SO-2017.1	0
SO_C_20170719_R_0953.JPG	2017-07-19 13:02:50	58.43365	-135.9983083	217	Random	0	0	0	0	Good	LFT	2017-09-13	SO-2017.1	0
SO_C_20170719_R_0954.JPG	2017-07-19 13:02:51	58.43364167	-135.9991361	219	Random	0	0	0	0	Good	LFT	2017-09-13	SO-2017.1	0
SO_C_20170719_R_0955.JPG	2017-07-19 13:02:52	58.43363333	-135.9999556	219	Random	0	0	0	0	Good	LFT	2017-09-13	SO-2017.1	0
SO_C_20170719_R_0956.JPG	2017-07-19 13:02:53	58.433625	-136.0007722	220	Random	0	0	0	0	Good	LFT	2017-09-13	SO-2017.1	0
SO_C_20170719_R_0957.JPG	2017-07-19 13:02:54	58.43361111	-136.0015861	222	Random	0	0	0	0	Good	LFT	2017-09-13	SO-2017.1	0
SO_C_20170719_R_0958.JPG	2017-07-19 13:02:55	58.4336	-136.0023944	223	Random	0	0	0	0	Good	LFT	2017-09-13	SO-2017.1	0
SO_C_20170719_R_0959.JPG	2017-07-19 13:02:56	58.43358611	-136.0032	224	Random	0	0	0	0	Good	LFT	2017-09-13	SO-2017.1	0
SO_C_20170719_R_0960.JPG	2017-07-19 13:02:57	58.433575	-136.0040083	225	Random	0	0	0	0	Good	LFT	2017-09-13	SO-2017.1	0
SO_C_20170719_R_0961.JPG	2017-07-19 13:02:58	58.43356667	-136.0048167	225	Random	0	0	1	0	Good	LFT	2017-09-13	SO-2017.1	0
SO_C_20170719_R_0962.JPG	2017-07-19 13:02:59	58.43356111	-136.0056333	223	Random	0	0	1	0	Good	LFT	2017-09-13	SO-2017.1	0
SO_C_20170719_R_0963.JPG	2017-07-19 13:03:00	58.43355556	-136.0064528	222	Random	0	0	0	0	Good	LFT	2017-09-13	SO-2017.1	0
SO_C_20170719_R_0964.JPG	2017-07-19 13:03:01	58.43355	-136.0072778	220	Random	0	0	0	0	Good	LFT	2017-09-13	SO-2017.1	0
SO_C_20170719_R_0965.JPG	2017-07-19 13:03:02	58.43354167	-136.0081083	219	Random	0	0	1	0	Good	LFT	2017-09-13	SO-2017.1	0
SO_C_20170719_R_0966.JPG	2017-07-19 13:03:03	58.43353611	-136.0089417	218	Random	0	0	1	0	Good	LFT	2017-09-13	SO-2017.1	0
SO_C_20170719_R_0967.JPG	2017-07-19 13:03:04	58.43353056	-136.0097778	217	Random	0	0	0	0	Good	LFT	2017-09-13	SO-2017.1	0
SO_C_20170719_R_0968.JPG	2017-07-19 13:03:05	58.43351944	-136.0106139	217	Random	0	0	1	0	Good	LFT	2017-09-13	SO-2017.1	0
SO_C_20170719_R_0969.JPG	2017-07-19 13:03:06	58.43351111	-136.0114472	217	Random	0	0	1	0	Good	LFT	2017-09-13	SO-2017.1	0
SO_C_20170719_R_0970.JPG	2017-07-19 13:03:07	58.43350278	-136.0122778	219	Random	0	0	0	0	Good	LFT	2017-09-13	SO-2017.1	0
SO_C_20170719_R_0971.JPG	2017-07-19 13:03:08	58.43349722	-136.0131028	220	Random	0	0	0	0	Good	LFT	2017-09-13	SO-2017.1	0
SO_C_20170719_R_0972.JPG	2017-07-19 13:03:09	58.43349167	-136.013925	221	Random	0	0	0	0	Good	LFT	2017-09-13	SO-2017.1	0
SO_C_20170719_R_0973.JPG	2017-07-19 13:03:10	58.43348611	-136.0147361	223	Random	0	0	0	0	Good	LFT	2017-09-13	SO-2017.1	0
SO_C_20170719_R_0974.JPG	2017-07-19 13:03:11	58.43348056	-136.0155444	224	Random	0	0	0	0	Good	LFT	2017-09-13	SO-2017.1	0
SO_C_20170719_R_0975.JPG	2017-07-19 13:03:12	58.433475	-136.0163472	226	Random	0	0	0	0	Good	LFT	2017-09-13	SO-2017.1	0
SO_C_20170719_R_0976.JPG	2017-07-19 13:03:13	58.43346667	-136.01715	226	Random	0	0	0	0	Good	LFT	2017-09-13	SO-2017.1	0
SO_C_20170719_R_0977.JPG	2017-07-19 13:03:14	58.43345556	-136.01795	227	Random	0	0	0	0	Good	LFT	2017-09-13	SO-2017.1	0
SO_C_20170719_R_0978.JPG	2017-07-19 13:03:15	58.43344722	-136.01875	227	Random	0	0	0	0	Good	LFT	2017-09-13	SO-2017.1	0
SO_C_20170719_R_0979.JPG	2017-07-19 13:03:16	58.43344167	-136.0195556	227	Random	0	0	0	0	Good	LFT	2017-09-13	SO-2017.1	0
SO_C_20170719_R_0980.JPG	2017-07-19 13:03:17	58.43343611	-136.0203639	226	Random	0	0	0	0	Good	LFT	2017-09-13	SO-2017.1	0
SO_C_20170719_R_0981.JPG	2017-07-19 13:03:18	58.43343333	-136.0211722	224	Random	0	0	0	0	Good	LFT	2017-09-13	SO-2017.1	0
SO_C_20170719_R_0982.JPG	2017-07-19 13:03:19	58.43343056	-136.0219889	222	Random	0	0	0	0	Good	LFT	2017-09-13	SO-2017.1	0
SO_C_20170719_R_0983.JPG	2017-07-19 13:03:20	58.43343056	-136.0228083	221	Random	0	0	0	0	Good	LFT	2017-09-13	SO-2017.1	0
SO_C_20170719_R_0984.JPG	2017-07-19 13:03:21	58.43343333	-136.0236333	220	Random	0	0	0	0	Good	LFT	2017-09-13	SO-2017.1	0
SO_C_20170719_R_0985.JPG	2017-07-19 13:03:22	58.43343056	-136.0244583	219	Random	0	0	0	0	Good	LFT	2017-09-13	SO-2017.1	0
SO_C_20170719_R_0986.JPG	2017-07-19 13:03:23	58.43343056	-136.0252806	219	Random	0	0	0	0	Good	LFT	2017-09-13	SO-2017.1	0
SO_C_20170719_R_0987.JPG	2017-07-19 13:03:24	58.433425	-136.0261028	219	Random	0	0	0	0	Good	LFT	2017-09-13	SO-2017.1	0
SO_C_20170719_R_0988.JPG	2017-07-19 13:03:25	58.43341944	-136.0269194	221	Random	0	0	0	0	Good	LFT	2017-09-13	SO-2017.1	0
SO_C_20170719_R_0989.JPG	2017-07-19 13:03:26	58.43341389	-136.0277306	222	Random	0	0	0	0	Good	LFT	2017-09-13	SO-2017.1	0
SO_C_20170719_R_0990.JPG	2017-07-19 13:03:27	58.43340833	-136.0285361	222	Random	0	0	0	0	Good	LFT	2017-09-13	SO-2017.1	0
SO_C_20170719_R_0991.JPG	2017-07-19 13:03:28	58.43340278	-136.0293417	223	Random	0	0	0	0	Good	LFT	2017-09-13	SO-2017.1	0
SO_C_20170719_R_0992.JPG	2017-07-19 13:03:29	58.43339444	-136.0301417	224	Random	0	0	0	0	Good	LFT	2017-09-13	SO-2017.1	0
SO_C_20170719_R_0993.JPG	2017-07-19 13:03:30	58.43339167	-136.0309444	225	Random	0	0	0	0	Good	LFT	2017-09-13	SO-2017.1	0
SO_C_20170719_R_0994.JPG	2017-07-19 13:03:31	58.43339167	-136.0317472	224	Random	0	0	0	0	Good	LFT	2017-09-13	SO-2017.1	0
SO_C_20170719_R_0995.JPG	2017-07-19 13:03:32	58.43339167	-136.0325528	223	Random	0	0	0	0	Good	LFT	2017-09-13	SO-2017.1	0
SO_C_20170719_R_0996.JPG	2017-07-19 13:03:33	58.43339167	-136.0333611	223	Random	0	0	0	0	Good	LFT	2017-09-13	SO-2017.1	0
SO_C_20170719_R_0997.JPG	2017-07-19 13:03:34	58.43339167	-136.0341722	223	Random	0	0	0	0	Good	LFT	2017-09-13	SO-2017.1	0
SO_C_20170719_R_0998.JPG	2017-07-19 13:03:35	58.43338889	-136.0349861	222	Random	0	0	1	0	Good	LFT	2017-09-13	SO-2017.1	0
SO_C_20170719_R_0999.JPG	2017-07-19 13:03:36	58.43338611	-136.0358	221	Random	0	0	1	0	Good	LFT	2017-09-13	SO-2017.1	0
SO_C_20170719_R_1000.JPG	2017-07-19 13:03:37	58.43338333	-136.0366139	221	Random	0	0	1	0	Good	LFT	2017-09-13	SO-2017.1	0
SO_C_20170719_R_1001.JPG	2017-07-19 13:03:38	58.43337778	-136.0374306	220	Random	0	0	0	0	Good	LFT	2017-09-13	SO-2017.1	0
SO_C_20170719_R_1002.JPG	2017-07-19 13:03:39	58.433375	-136.0382472	220	Random	0	0	1	0	Good	LFT	2017-09-13	SO-2017.1	0
SO_C_20170719_R_1003.JPG	2017-07-19 13:03:40	58.43337222	-136.0390639	218	Random	0	0	1	0	Good	LFT	2017-09-13	SO-2017.1	0
SO_C_20170719_R_1004.JPG	2017-07-19 13:03:41	58.43336667	-136.0398806	217	Random	0	0	0	0	Good	LFT	2017-09-13	SO-2017.1	0
SO_C_20170719_R_1005.JPG	2017-07-19 13:03:42	58.43336111	-136.0406972	218	Random	0	0	0	0	Good	LFT	2017-09-13	SO-2017.1	0
SO_C_20170719_R_1006.JPG	2017-07-19 13:03:43	58.43335278	-136.0415083	218	Random	0	0	0	0	Good	LFT	2017-09-13	SO-2017.1	0
SO_C_20170719_R_1007.JPG	2017-07-19 13:03:44	58.43333889	-136.0423194	219	Random	0	0	0	0	Good	LFT	2017-09-13	SO-2017.1	0
SO_C_20170719_R_1008.JPG	2017-07-19 13:03:45	58.433325	-136.0431278	220	Random	0	0	0	0	Good	LFT	2017-09-13	SO-2017.1	0
SO_C_20170719_R_1009.JPG	2017-07-19 13:03:46	58.43331111	-136.0439333	221	Random	0	0	0	0	Good	LFT	2017-09-13	SO-2017.1	0
SO_C_20170719_R_1010.JPG	2017-07-19 13:03:47	58.43329722	-136.0447361	222	Random	0	0	0	0	Good	LFT	2017-09-13	SO-2017.1	0
SO_C_20170719_R_1011.JPG	2017-07-19 13:03:48	58.43328333	-136.0455389	223	Random	0	0	0	0	Good	LFT	2017-09-13	SO-2017.1	0
SO_C_20170719_R_1012.JPG	2017-07-19 13:03:49	58.43326944	-136.0463389	224	Random	0	0	0	0	Good	LFT	2017-09-13	SO-2017.1	0
SO_C_20170719_R_1013.JPG	2017-07-19 13:03:50	58.43325833	-136.0471417	224	Random	0	0	1	0	Good	LFT	2017-09-13	SO-2017.1	0
SO_C_20170719_R_1014.JPG	2017-07-19 13:03:51	58.43325556	-136.0479417	224	Random	0	0	1	0	Good	LFT	2017-09-13	SO-2017.1	0
SO_C_20170719_R_1015.JPG	2017-07-19 13:03:52	58.43325833	-136.0487417	223	Random	0	0	1	0	Good	LFT	2017-09-13	SO-2017.1	0
SO_C_20170719_R_1016.JPG	2017-07-19 13:03:53	58.43326111	-136.0495444	223	Random	0	0	1	0	Good	LFT	2017-09-13	SO-2017.1	0
SO_C_20170719_R_1017.JPG	2017-07-19 13:03:54	58.43326667	-136.0503472	222	Random	0	0	1	0	Good	LFT	2017-09-13	SO-2017.1	0
SO_C_20170719_R_1018.JPG	2017-07-19 13:03:55	58.43326667	-136.0511528	222	Random	0	0	1	0	Good	LFT	2017-09-13	SO-2017.1	0
SO_C_20170719_R_1019.JPG	2017-07-19 13:03:56	58.43326667	-136.0519611	221	Random	0	0	0	0	Good	LFT	2017-09-13	SO-2017.1	0
SO_C_20170719_R_1020.JPG	2017-07-19 13:03:57	58.43326389	-136.052775	220	Random	0	0	1	0	Good	LFT	2017-09-13	SO-2017.1	0
SO_C_20170719_R_1021.JPG	2017-07-19 13:03:58	58.43325833	-136.0535889	220	Random	0	0	0	0	Good	LFT	2017-09-13	SO-2017.1	0
SO_C_20170719_R_1022.JPG	2017-07-19 13:03:59	58.43324722	-136.0544083	219	Random	0	0	0	0	Good	LFT	2017-09-13	SO-2017.1	0
SO_C_20170719_R_1023.JPG	2017-07-19 13:04:00	58.43323889	-136.0552278	219	Random	0	0	0	0	Good	LFT	2017-09-13	SO-2017.1	0
SO_C_20170719_R_1024.JPG	2017-07-19 13:04:01	58.43322778	-136.0560472	218	Random	0	0	0	0	Good	LFT	2017-09-13	SO-2017.1	0
SO_C_20170719_R_1025.JPG	2017-07-19 13:04:02	58.43321389	-136.0568694	219	Random	0	0	1	0	Good	LFT	2017-09-13	SO-2017.1	0
SO_C_20170719_R_1026.JPG	2017-07-19 13:04:03	58.43319722	-136.0576889	219	Random	0	0	1	0	Good	LFT	2017-09-13	SO-2017.1	0
SO_C_20170719_R_1027.JPG	2017-07-19 13:04:04	58.433175	-136.0585083	220	Random	0	0	0	0	Good	LFT	2017-09-13	SO-2017.1	0
SO_C_20170719_R_1028.JPG	2017-07-19 13:04:05	58.43315278	-136.059325	220	Random	0	0	0	0	Good	LFT	2017-09-13	SO-2017.1	0
SO_C_20170719_R_1029.JPG	2017-07-19 13:04:06	58.43313056	-136.0601389	220	Random	0	0	1	0	Good	LFT	2017-09-13	SO-2017.1	0
SO_C_20170719_R_1030.JPG	2017-07-19 13:04:07	58.43310833	-136.0609472	220	Random	0	0	1	0	Good	LFT	2017-09-13	SO-2017.1	0
SO_C_20170719_R_1031.JPG	2017-07-19 13:04:08	58.43308333	-136.0617556	220	Random	0	0	1	1	Good	LFT	2017-09-13	SO-2017.1	0
SO_C_20170719_R_1032.JPG	2017-07-19 13:04:09	58.43306111	-136.0625611	220	Random	0	0	0	1	Good	LFT	2017-09-13	SO-2017.1	0
SO_C_20170719_R_1033.JPG	2017-07-19 13:04:10	58.43303889	-136.0633667	220	Random	0	0	0	1	Good	LFT	2017-09-13	SO-2017.1	0
SO_C_20170719_R_1034.JPG	2017-07-19 13:04:11	58.43301944	-136.0641694	222	Random	0	0	0	1	Good	LFT	2017-09-13	SO-2017.1	0
SO_C_20170719_R_1035.JPG	2017-07-19 13:04:12	58.433	-136.0649694	222	Random	0	0	0	1	Good	LFT	2017-09-13	SO-2017.1	0
SO_C_20170719_R_1036.JPG	2017-07-19 13:06:27	58.43941944	-136.0774222	223	Random	0	0	0	1	Good	LFT	2017-09-13	SO-2017.1	0
SO_C_20170719_R_1037.JPG	2017-07-19 13:06:28	58.43933611	-136.0766	223	Random	0	0	0	1	Good	LFT	2017-09-13	SO-2017.1	0
SO_C_20170719_R_1038.JPG	2017-07-19 13:06:29	58.439275	-136.0757722	222	Random	0	0	0	1	Good	LFT	2017-09-13	SO-2017.1	0
SO_C_20170719_R_1039.JPG	2017-07-19 13:06:30	58.43923333	-136.0749361	221	Random	0	0	0	1	Good	LFT	2017-09-13	SO-2017.1	0
SO_C_20170719_R_1040.JPG	2017-07-19 13:06:31	58.43921944	-136.0740972	219	Random	0	0	0	1	Good	LFT	2017-09-13	SO-2017.1	0
SO_C_20170719_R_1041.JPG	2017-07-19 13:06:32	58.439225	-136.07325	216	Random	0	0	0	1	Good	LFT	2017-09-13	SO-2017.1	0
SO_C_20170719_R_1042.JPG	2017-07-19 13:06:33	58.43924167	-136.0723972	214	Random	0	0	0	1	Good	LFT	2017-09-13	SO-2017.1	0
SO_C_20170719_R_1043.JPG	2017-07-19 13:06:34	58.43926389	-136.0715389	213	Random	0	0	0	1	Good	LFT	2017-09-13	SO-2017.1	0
SO_C_20170719_R_1044.JPG	2017-07-19 13:06:35	58.43928611	-136.0706722	212	Random	0	0	0	1	Good	LFT	2017-09-13	SO-2017.1	0
SO_C_20170719_R_1045.JPG	2017-07-19 13:06:36	58.43930556	-136.0697972	211	Random	0	0	1	1	Good	LFT	2017-09-13	SO-2017.1	0
SO_C_20170719_R_1046.JPG	2017-07-19 13:06:37	58.43932222	-136.0689139	210	Random	0	0	1	0	Good	LFT	2017-09-13	SO-2017.1	0
SO_C_20170719_R_1047.JPG	2017-07-19 13:06:38	58.43934167	-136.0680278	209	Random	0	0	0	0	Good	LFT	2017-09-13	SO-2017.1	0
SO_C_20170719_R_1048.JPG	2017-07-19 13:06:39	58.43936389	-136.0671417	208	Random	0	0	0	0	Good	LFT	2017-09-13	SO-2017.1	0
SO_C_20170719_R_1049.JPG	2017-07-19 13:06:40	58.43939444	-136.06625	206	Random	0	0	0	0	Good	LFT	2017-09-13	SO-2017.1	0
SO_C_20170719_R_1050.JPG	2017-07-19 13:06:41	58.43942778	-136.0653556	207	Random	0	0	0	0	Good	LFT	2017-09-13	SO-2017.1	0
SO_C_20170719_R_1051.JPG	2017-07-19 13:06:42	58.43946389	-136.0644667	207	Random	0	0	0	0	Good	LFT	2017-09-13	SO-2017.1	0
SO_C_20170719_R_1052.JPG	2017-07-19 13:06:43	58.43950278	-136.0635778	209	Random	0	0	0	0	Good	LFT	2017-09-13	SO-2017.1	0
SO_C_20170719_R_1053.JPG	2017-07-19 13:06:44	58.43953889	-136.0626972	212	Random	0	0	0	0	Good	LFT	2017-09-13	SO-2017.1	0
SO_C_20170719_R_1054.JPG	2017-07-19 13:06:45	58.43958056	-136.0618222	214	Random	0	0	0	0	Good	LFT	2017-09-13	SO-2017.1	0
SO_C_20170719_R_1055.JPG	2017-07-19 13:06:46	58.43962222	-136.0609583	215	Random	0	0	0	0	Good	LFT	2017-09-13	SO-2017.1	0
SO_C_20170719_R_1056.JPG	2017-07-19 13:06:47	58.43966389	-136.0600972	217	Random	0	0	0	0	Good	LFT	2017-09-13	SO-2017.1	0
SO_C_20170719_R_1057.JPG	2017-07-19 13:06:48	58.43971111	-136.0592444	220	Random	0	0	0	0	Good	LFT	2017-09-13	SO-2017.1	0
SO_C_20170719_R_1058.JPG	2017-07-19 13:06:49	58.43976111	-136.0584	222	Random	0	0	0	0	Good	LFT	2017-09-13	SO-2017.1	0
SO_C_20170719_R_1059.JPG	2017-07-19 13:06:50	58.43981111	-136.0575556	224	Random	0	0	0	0	Good	LFT	2017-09-13	SO-2017.1	0
SO_C_20170719_R_1060.JPG	2017-07-19 13:06:51	58.43986389	-136.0567139	226	Random	0	0	0	0	Good	LFT	2017-09-13	SO-2017.1	0
SO_C_20170719_R_1061.JPG	2017-07-19 13:06:52	58.43991389	-136.0558667	226	Random	0	0	1	0	Good	LFT	2017-09-13	SO-2017.1	0
SO_C_20170719_R_1062.JPG	2017-07-19 13:06:53	58.43996111	-136.0550139	225	Random	0	0	0	0	Good	LFT	2017-09-13	SO-2017.1	0
SO_C_20170719_R_1063.JPG	2017-07-19 13:06:54	58.44000278	-136.0541528	223	Random	0	0	0	0	Good	LFT	2017-09-13	SO-2017.1	0
SO_C_20170719_R_1064.JPG	2017-07-19 13:06:55	58.44004444	-136.0532889	222	Random	0	0	1	0	Good	LFT	2017-09-13	SO-2017.1	0
SO_C_20170719_R_1065.JPG	2017-07-19 13:06:56	58.44007778	-136.0524194	221	Random	0	0	1	0	Good	LFT	2017-09-13	SO-2017.1	0
SO_C_20170719_R_1066.JPG	2017-07-19 13:06:57	58.44010556	-136.0515472	219	Random	0	0	1	0	Good	LFT	2017-09-13	SO-2017.1	0
SO_C_20170719_R_1067.JPG	2017-07-19 13:06:58	58.44012778	-136.0506778	217	Random	0	0	1	0	Good	LFT	2017-09-13	SO-2017.1	0
SO_C_20170719_R_1068.JPG	2017-07-19 13:06:59	58.44014167	-136.0498083	216	Random	0	0	1	0	Good	LFT	2017-09-13	SO-2017.1	0
SO_C_20170719_R_1069.JPG	2017-07-19 13:07:00	58.44015	-136.0489417	216	Random	0	0	1	0	Good	LFT	2017-09-13	SO-2017.1	0
SO_C_20170719_R_1070.JPG	2017-07-19 13:07:01	58.44015278	-136.0480778	216	Random	0	0	0	0	Good	LFT	2017-09-13	SO-2017.1	0
SO_C_20170719_R_1071.JPG	2017-07-19 13:07:02	58.44015278	-136.0472167	217	Random	0	0	0	0	Good	LFT	2017-09-13	SO-2017.1	0
SO_C_20170719_R_1072.JPG	2017-07-19 13:07:03	58.44015278	-136.0463611	218	Random	0	0	0	0	Good	LFT	2017-09-13	SO-2017.1	0
SO_C_20170719_R_1073.JPG	2017-07-19 13:07:04	58.44015	-136.0455111	218	Random	0	0	0	0	Good	LFT	2017-09-13	SO-2017.1	0
SO_C_20170719_R_1074.JPG	2017-07-19 13:07:05	58.44014444	-136.0446639	219	Random	0	0	0	0	Good	LFT	2017-09-13	SO-2017.1	0
SO_C_20170719_R_1075.JPG	2017-07-19 13:07:06	58.44013889	-136.0438194	220	Random	0	0	0	0	Good	LFT	2017-09-13	SO-2017.1	0
SO_C_20170719_R_1076.JPG	2017-07-19 13:07:07	58.44013611	-136.0429778	220	Random	0	0	0	0	Good	LFT	2017-09-13	SO-2017.1	0
SO_C_20170719_R_1077.JPG	2017-07-19 13:07:08	58.44013056	-136.0421389	221	Random	0	0	0	0	Good	LFT	2017-09-13	SO-2017.1	0
SO_C_20170719_R_1078.JPG	2017-07-19 13:07:09	58.44012778	-136.0413028	222	Random	0	0	0	0	Good	LFT	2017-09-13	SO-2017.1	0
SO_C_20170719_R_1079.JPG	2017-07-19 13:07:10	58.440125	-136.0404667	222	Random	0	0	0	0	Good	LFT	2017-09-13	SO-2017.1	0
SO_C_20170719_R_1080.JPG	2017-07-19 13:07:11	58.440125	-136.0396333	223	Random	0	0	0	0	Good	LFT	2017-09-13	SO-2017.1	0
SO_C_20170719_R_1081.JPG	2017-07-19 13:07:12	58.44012778	-136.0388	222	Random	0	0	0	0	Good	LFT	2017-09-13	SO-2017.1	0
SO_C_20170719_R_1082.JPG	2017-07-19 13:07:13	58.44012778	-136.0379694	222	Random	0	0	0	0	Good	LFT	2017-09-13	SO-2017.1	0
SO_C_20170719_R_1083.JPG	2017-07-19 13:07:14	58.44013056	-136.0371361	222	Random	0	0	0	0	Good	LFT	2017-09-13	SO-2017.1	0
SO_C_20170719_R_1084.JPG	2017-07-19 13:07:15	58.44013056	-136.0363028	221	Random	0	0	0	0	Good	LFT	2017-09-13	SO-2017.1	0
SO_C_20170719_R_1085.JPG	2017-07-19 13:07:16	58.44013611	-136.0354694	220	Random	0	0	0	0	Good	LFT	2017-09-13	SO-2017.1	0
SO_C_20170719_R_1086.JPG	2017-07-19 13:07:17	58.44014167	-136.0346333	219	Random	0	0	0	0	Good	LFT	2017-09-13	SO-2017.1	0
SO_C_20170719_R_1087.JPG	2017-07-19 13:07:18	58.44015278	-136.0337972	218	Random	0	0	0	0	Good	LFT	2017-09-13	SO-2017.1	0
SO_C_20170719_R_1088.JPG	2017-07-19 13:07:19	58.44016944	-136.0329583	217	Random	0	0	0	0	Good	LFT	2017-09-13	SO-2017.1	0
SO_C_20170719_R_1089.JPG	2017-07-19 13:07:20	58.44018611	-136.0321194	216	Random	0	0	0	0	Good	LFT	2017-09-13	SO-2017.1	0
SO_C_20170719_R_1090.JPG	2017-07-19 13:07:21	58.44020556	-136.0312806	215	Random	0	0	0	0	Good	LFT	2017-09-13	SO-2017.1	0
SO_C_20170719_R_1091.JPG	2017-07-19 13:07:22	58.44022778	-136.0304472	216	Random	0	0	0	0	Good	LFT	2017-09-13	SO-2017.1	0
SO_C_20170719_R_1092.JPG	2017-07-19 13:07:23	58.44024722	-136.0296139	217	Random	0	0	0	0	Good	LFT	2017-09-13	SO-2017.1	0
SO_C_20170719_R_1093.JPG	2017-07-19 13:07:24	58.44026944	-136.0287861	219	Random	0	0	0	0	Good	LFT	2017-09-13	SO-2017.1	0
SO_C_20170719_R_1094.JPG	2017-07-19 13:07:25	58.44028611	-136.0279639	220	Random	0	0	0	0	Good	LFT	2017-09-13	SO-2017.1	0
SO_C_20170719_R_1095.JPG	2017-07-19 13:07:26	58.44030556	-136.0271472	221	Random	0	0	0	0	Good	LFT	2017-09-13	SO-2017.1	0
SO_C_20170719_R_1096.JPG	2017-07-19 13:07:27	58.440325	-136.0263361	221	Random	0	0	0	0	Good	LFT	2017-09-13	SO-2017.1	0
SO_C_20170719_R_1097.JPG	2017-07-19 13:07:28	58.44034444	-136.025525	223	Random	0	0	0	0	Good	LFT	2017-09-13	SO-2017.1	0
SO_C_20170719_R_1098.JPG	2017-07-19 13:07:29	58.44036389	-136.0247167	223	Random	0	0	0	0	Good	LFT	2017-09-13	SO-2017.1	0
SO_C_20170719_R_1099.JPG	2017-07-19 13:07:30	58.44038333	-136.0239083	223	Random	0	0	0	0	Good	LFT	2017-09-13	SO-2017.1	0
SO_C_20170719_R_1100.JPG	2017-07-19 13:07:31	58.44040556	-136.0230972	224	Random	0	0	0	0	Good	LFT	2017-09-13	SO-2017.1	0
SO_C_20170719_R_1101.JPG	2017-07-19 13:07:32	58.440425	-136.0222833	222	Random	0	0	0	0	Good	LFT	2017-09-13	SO-2017.1	0
SO_C_20170719_R_1102.JPG	2017-07-19 13:07:33	58.44044722	-136.0214667	221	Random	0	0	0	0	Good	LFT	2017-09-13	SO-2017.1	0
SO_C_20170719_R_1103.JPG	2017-07-19 13:07:34	58.44046944	-136.0206444	220	Random	0	0	0	0	Good	LFT	2017-09-13	SO-2017.1	0
SO_C_20170719_R_1104.JPG	2017-07-19 13:07:35	58.44049167	-136.0198167	218	Random	0	0	0	0	Good	LFT	2017-09-13	SO-2017.1	0
SO_C_20170719_R_1105.JPG	2017-07-19 13:07:36	58.44050833	-136.0189861	217	Random	0	0	0	0	Good	LFT	2017-09-13	SO-2017.1	0
SO_C_20170719_R_1106.JPG	2017-07-19 13:07:37	58.44052222	-136.01815	215	Random	0	0	0	0	Good	LFT	2017-09-13	SO-2017.1	0
SO_C_20170719_R_1107.JPG	2017-07-19 13:07:38	58.44053333	-136.0173139	214	Random	0	0	0	0	Good	LFT	2017-09-13	SO-2017.1	0
SO_C_20170719_R_1108.JPG	2017-07-19 13:07:39	58.44054167	-136.016475	214	Random	0	0	0	0	Good	LFT	2017-09-13	SO-2017.1	0
SO_C_20170719_R_1109.JPG	2017-07-19 13:07:40	58.44054722	-136.0156389	214	Random	0	0	1	0	Good	LFT	2017-09-13	SO-2017.1	0
SO_C_20170719_R_1110.JPG	2017-07-19 13:07:41	58.44055	-136.0148028	215	Random	0	0	1	0	Good	LFT	2017-09-13	SO-2017.1	0
SO_C_20170719_R_1111.JPG	2017-07-19 13:07:42	58.44055	-136.0139722	215	Random	0	0	1	0	Good	LFT	2017-09-13	SO-2017.1	0
SO_C_20170719_R_1112.JPG	2017-07-19 13:07:43	58.44054722	-136.0131472	216	Random	0	0	1	0	Good	LFT	2017-09-13	SO-2017.1	0
SO_C_20170719_R_1113.JPG	2017-07-19 13:07:44	58.44054167	-136.012325	218	Random	0	0	0	0	Good	LFT	2017-09-13	SO-2017.1	0
SO_C_20170719_R_1114.JPG	2017-07-19 13:07:45	58.44053056	-136.0115083	219	Random	0	0	0	0	Good	LFT	2017-09-13	SO-2017.1	0
SO_C_20170719_R_1115.JPG	2017-07-19 13:07:46	58.44052222	-136.0106944	220	Random	0	0	0	0	Good	LFT	2017-09-13	SO-2017.1	0
SO_C_20170719_R_1116.JPG	2017-07-19 13:07:47	58.44051389	-136.0098806	220	Random	0	0	0	0	Good	LFT	2017-09-13	SO-2017.1	0
SO_C_20170719_R_1117.JPG	2017-07-19 13:07:48	58.44051111	-136.0090694	220	Random	0	0	0	0	Good	LFT	2017-09-13	SO-2017.1	0
SO_C_20170719_R_1118.JPG	2017-07-19 13:07:49	58.44050556	-136.0082583	220	Random	0	0	0	0	Good	LFT	2017-09-13	SO-2017.1	0
SO_C_20170719_R_1119.JPG	2017-07-19 13:07:50	58.44050278	-136.0074444	220	Random	0	0	0	0	Good	LFT	2017-09-13	SO-2017.1	0
SO_C_20170719_R_1120.JPG	2017-07-19 13:07:51	58.4405	-136.0066333	220	Random	0	0	0	0	Good	LFT	2017-09-13	SO-2017.1	0
SO_C_20170719_R_1121.JPG	2017-07-19 13:07:52	58.4405	-136.0058194	219	Random	0	0	0	0	Good	LFT	2017-09-13	SO-2017.1	0
SO_C_20170719_R_1122.JPG	2017-07-19 13:07:53	58.44050556	-136.0050056	219	Random	0	0	0	0	Good	LFT	2017-09-13	SO-2017.1	0
SO_C_20170719_R_1123.JPG	2017-07-19 13:07:54	58.44050833	-136.0041917	219	Random	0	0	0	0	Good	LFT	2017-09-13	SO-2017.1	0
SO_C_20170719_R_1124.JPG	2017-07-19 13:07:55	58.44051389	-136.0033778	219	Random	0	0	0	0	Good	LFT	2017-09-13	SO-2017.1	0
SO_C_20170719_R_1125.JPG	2017-07-19 13:07:56	58.44051667	-136.0025639	219	Random	0	0	0	0	Good	LFT	2017-09-13	SO-2017.1	0
SO_C_20170719_R_1126.JPG	2017-07-19 13:07:57	58.44051944	-136.0017528	219	Random	0	0	0	0	Good	LFT	2017-09-13	SO-2017.1	0
SO_C_20170719_R_1127.JPG	2017-07-19 13:07:58	58.44051944	-136.0009389	218	Random	0	0	0	0	Good	LFT	2017-09-13	SO-2017.1	0
SO_C_20170719_R_1128.JPG	2017-07-19 13:07:59	58.44051667	-136.0001278	218	Random	0	0	0	0	Good	LFT	2017-09-13	SO-2017.1	0
SO_C_20170719_R_1129.JPG	2017-07-19 13:08:00	58.44051389	-135.9993167	218	Random	0	0	0	0	Good	LFT	2017-09-13	SO-2017.1	0
SO_C_20170719_R_1130.JPG	2017-07-19 13:08:01	58.44051111	-135.9985083	218	Random	0	0	0	0	Good	LFT	2017-09-13	SO-2017.1	0
SO_C_20170719_R_1131.JPG	2017-07-19 13:08:02	58.44051389	-135.9977028	218	Random	0	0	0	0	Good	LFT	2017-09-13	SO-2017.1	0
SO_C_20170719_R_1132.JPG	2017-07-19 13:08:03	58.44051944	-135.9968944	218	Random	0	0	0	0	Good	LFT	2017-09-13	SO-2017.1	0
SO_C_20170719_R_1133.JPG	2017-07-19 13:08:04	58.440525	-135.9960917	217	Random	0	0	0	0	Good	LFT	2017-09-13	SO-2017.1	0
SO_C_20170719_R_1134.JPG	2017-07-19 13:08:05	58.44053611	-135.9952889	217	Random	0	0	0	0	Good	LFT	2017-09-13	SO-2017.1	0
SO_C_20170719_R_1135.JPG	2017-07-19 13:08:06	58.44054722	-135.9944833	218	Random	0	0	0	0	Good	LFT	2017-09-13	SO-2017.1	0
SO_C_20170719_R_1136.JPG	2017-07-19 13:08:07	58.44056111	-135.9936833	218	Random	0	0	0	0	Good	LFT	2017-09-13	SO-2017.1	0
SO_C_20170719_R_1137.JPG	2017-07-19 13:08:08	58.440575	-135.9928833	218	Random	0	0	0	0	Good	LFT	2017-09-13	SO-2017.1	0
SO_C_20170719_R_1138.JPG	2017-07-19 13:08:09	58.44058889	-135.9920833	219	Random	0	0	1	0	Good	LFT	2017-09-13	SO-2017.1	0
SO_C_20170719_R_1139.JPG	2017-07-19 13:08:10	58.4406	-135.9912833	218	Random	0	0	1	0	Good	LFT	2017-09-13	SO-2017.1	0
SO_C_20170719_R_1140.JPG	2017-07-19 13:08:11	58.44061111	-135.9904861	219	Random	0	0	0	0	Good	LFT	2017-09-13	SO-2017.1	0
SO_C_20170719_R_1141.JPG	2017-07-19 13:08:12	58.440625	-135.9896889	219	Random	0	0	0	0	Good	LFT	2017-09-13	SO-2017.1	0
SO_C_20170719_R_1142.JPG	2017-07-19 13:08:13	58.44063889	-135.9888917	219	Random	0	0	0	0	Good	LFT	2017-09-13	SO-2017.1	0
SO_C_20170719_R_1143.JPG	2017-07-19 13:08:14	58.44065	-135.9880944	219	Random	0	0	0	0	Good	LFT	2017-09-13	SO-2017.1	0
SO_C_20170719_R_1144.JPG	2017-07-19 13:08:15	58.44065833	-135.9872972	219	Random	0	0	0	0	Good	LFT	2017-09-13	SO-2017.1	0
SO_C_20170719_R_1145.JPG	2017-07-19 13:08:16	58.44066389	-135.9865	219	Random	0	0	0	0	Good	LFT	2017-09-13	SO-2017.1	0
SO_C_20170719_R_1146.JPG	2017-07-19 13:08:17	58.44066667	-135.9857056	219	Random	0	0	0	0	Good	LFT	2017-09-13	SO-2017.1	0
SO_C_20170719_R_1147.JPG	2017-07-19 13:08:18	58.44066667	-135.9849111	218	Random	0	0	0	0	Good	LFT	2017-09-13	SO-2017.1	0
SO_C_20170719_R_1148.JPG	2017-07-19 13:08:19	58.44066389	-135.9841167	219	Random	0	0	0	0	Good	LFT	2017-09-13	SO-2017.1	0
SO_C_20170719_R_1149.JPG	2017-07-19 13:08:20	58.44066111	-135.9833222	219	Random	0	0	0	0	Good	LFT	2017-09-13	SO-2017.1	0
SO_C_20170719_R_1150.JPG	2017-07-19 13:08:21	58.44065833	-135.9825333	219	Random	0	0	0	0	Good	LFT	2017-09-13	SO-2017.1	0
SO_C_20170719_R_1151.JPG	2017-07-19 13:08:22	58.44065278	-135.9817444	219	Random	0	0	0	0	Good	LFT	2017-09-13	SO-2017.1	0
SO_C_20170719_R_1152.JPG	2017-07-19 13:08:23	58.44065	-135.9809583	220	Random	0	0	0	0	Good	LFT	2017-09-13	SO-2017.1	0
SO_C_20170719_R_1153.JPG	2017-07-19 13:08:24	58.44064722	-135.9801778	221	Random	0	0	0	0	Good	LFT	2017-09-13	SO-2017.1	0
SO_C_20170719_R_1154.JPG	2017-07-19 13:08:25	58.44064722	-135.9793972	221	Random	0	0	0	0	Good	LFT	2017-09-13	SO-2017.1	0
SO_C_20170719_R_1155.JPG	2017-07-19 13:08:26	58.44064722	-135.9786222	223	Random	0	0	0	0	Good	LFT	2017-09-13	SO-2017.1	0
SO_C_20170719_R_1156.JPG	2017-07-19 13:08:27	58.44065	-135.97785	223	Random	0	0	0	0	Good	LFT	2017-09-13	SO-2017.1	0
SO_C_20170719_R_1157.JPG	2017-07-19 13:08:28	58.44065278	-135.9770778	224	Random	0	0	0	0	Good	LFT	2017-09-13	SO-2017.1	0
SO_C_20170719_R_1158.JPG	2017-07-19 13:08:29	58.44065556	-135.9763083	225	Random	0	0	0	0	Good	LFT	2017-09-13	SO-2017.1	0
SO_C_20170719_R_1159.JPG	2017-07-19 13:08:30	58.44066389	-135.9755389	225	Random	0	0	0	0	Good	LFT	2017-09-13	SO-2017.1	0
SO_C_20170719_R_1160.JPG	2017-07-19 13:08:31	58.44067222	-135.9747639	225	Random	0	0	0	0	Good	LFT	2017-09-13	SO-2017.1	0
SO_C_20170719_R_1161.JPG	2017-07-19 13:08:32	58.44068333	-135.9739889	225	Random	0	0	0	0	Good	LFT	2017-09-13	SO-2017.1	0
SO_C_20170719_R_1162.JPG	2017-07-19 13:08:33	58.44069444	-135.9732056	224	Random	0	0	0	0	Good	LFT	2017-09-13	SO-2017.1	0
SO_C_20170719_R_1163.JPG	2017-07-19 13:08:34	58.44070833	-135.9724167	224	Random	0	0	0	0	Good	LFT	2017-09-13	SO-2017.1	0
SO_C_20170719_R_1164.JPG	2017-07-19 13:08:35	58.44072222	-135.971625	223	Random	0	0	0	0	Good	LFT	2017-09-13	SO-2017.1	0
SO_C_20170719_R_1165.JPG	2017-07-19 13:08:36	58.44073611	-135.9708278	222	Random	0	0	0	0	Good	LFT	2017-09-13	SO-2017.1	0
SO_C_20170719_R_1166.JPG	2017-07-19 13:08:37	58.44075	-135.970025	222	Random	0	0	0	0	Good	LFT	2017-09-13	SO-2017.1	0
SO_C_20170719_R_1167.JPG	2017-07-19 13:08:38	58.44076667	-135.9692222	221	Random	0	0	0	0	Good	LFT	2017-09-13	SO-2017.1	0
SO_C_20170719_R_1168.JPG	2017-07-19 13:08:39	58.44078333	-135.9684194	222	Random	0	0	0	0	Good	LFT	2017-09-13	SO-2017.1	0
SO_C_20170719_R_1169.JPG	2017-07-19 13:08:40	58.4408	-135.9676139	222	Random	0	0	0	0	Good	LFT	2017-09-13	SO-2017.1	0
SO_C_20170719_R_1170.JPG	2017-07-19 13:08:41	58.44081667	-135.9668083	222	Random	0	0	0	0	Good	LFT	2017-09-13	SO-2017.1	0
SO_C_20170719_R_1171.JPG	2017-07-19 13:08:42	58.44083611	-135.9660028	223	Random	0	0	0	0	Good	LFT	2017-09-13	SO-2017.1	0
SO_C_20170719_R_1172.JPG	2017-07-19 13:08:43	58.44085278	-135.9652	224	Random	0	0	0	0	Good	LFT	2017-09-13	SO-2017.1	0
SO_C_20170719_R_1173.JPG	2017-07-19 13:08:44	58.44087222	-135.9644	225	Random	0	0	0	0	Good	LFT	2017-09-13	SO-2017.1	0
SO_C_20170719_R_1174.JPG	2017-07-19 13:08:45	58.44088889	-135.9636028	225	Random	0	0	0	0	Good	LFT	2017-09-13	SO-2017.1	0
SO_C_20170719_R_1175.JPG	2017-07-19 13:08:46	58.44090556	-135.9628	226	Random	0	0	0	0	Good	LFT	2017-09-13	SO-2017.1	0
SO_C_20170719_R_1176.JPG	2017-07-19 13:08:47	58.44091944	-135.9619972	226	Random	0	0	0	0	Good	LFT	2017-09-13	SO-2017.1	0
SO_C_20170719_R_1177.JPG	2017-07-19 13:08:48	58.44093056	-135.9611917	225	Random	0	0	0	0	Good	LFT	2017-09-13	SO-2017.1	0
SO_C_20170719_R_1178.JPG	2017-07-19 13:08:49	58.44094167	-135.9603806	225	Random	0	0	0	0	Good	LFT	2017-09-13	SO-2017.1	0
SO_C_20170719_R_1179.JPG	2017-07-19 13:08:50	58.44094722	-135.9595611	223	Random	0	0	0	0	Good	LFT	2017-09-13	SO-2017.1	0
SO_C_20170719_R_1180.JPG	2017-07-19 13:08:51	58.44095278	-135.9587389	222	Random	0	0	0	0	Good	LFT	2017-09-13	SO-2017.1	0
SO_C_20170719_R_1181.JPG	2017-07-19 13:08:52	58.44095278	-135.9579111	221	Random	0	0	0	0	Good	LFT	2017-09-13	SO-2017.1	0
SO_C_20170719_R_1182.JPG	2017-07-19 13:08:53	58.44094722	-135.9570778	219	Random	0	0	0	0	Good	LFT	2017-09-13	SO-2017.1	0
SO_C_20170719_R_1183.JPG	2017-07-19 13:08:54	58.44094167	-135.9562417	218	Random	0	0	0	0	Good	LFT	2017-09-13	SO-2017.1	0
SO_C_20170719_R_1184.JPG	2017-07-19 13:08:55	58.44093611	-135.9554028	216	Random	0	0	0	0	Good	LFT	2017-09-13	SO-2017.1	0
SO_C_20170719_R_1185.JPG	2017-07-19 13:08:56	58.44093056	-135.9545639	216	Random	0	0	0	0	Good	LFT	2017-09-13	SO-2017.1	0
SO_C_20170719_R_1186.JPG	2017-07-19 13:08:57	58.44092222	-135.953725	217	Random	0	0	0	0	Good	LFT	2017-09-13	SO-2017.1	0
SO_C_20170719_R_1187.JPG	2017-07-19 13:08:58	58.44091389	-135.9528917	217	Random	0	0	0	0	Good	LFT	2017-09-13	SO-2017.1	0
SO_C_20170719_R_1188.JPG	2017-07-19 13:08:59	58.44090556	-135.9520583	218	Random	0	0	0	0	Good	LFT	2017-09-13	SO-2017.1	0
SO_C_20170719_R_1189.JPG	2017-07-19 13:09:00	58.44089167	-135.9512306	219	Random	0	0	0	0	Good	LFT	2017-09-13	SO-2017.1	0
SO_C_20170719_R_1190.JPG	2017-07-19 13:09:01	58.44088056	-135.9504028	220	Random	0	0	0	0	Good	LFT	2017-09-13	SO-2017.1	0
SO_C_20170719_R_1191.JPG	2017-07-19 13:09:02	58.44086944	-135.949575	221	Random	0	0	0	0	Good	LFT	2017-09-13	SO-2017.1	0
SO_C_20170719_R_1192.JPG	2017-07-19 13:09:03	58.44086111	-135.94875	221	Random	0	0	0	0	Good	LFT	2017-09-13	SO-2017.1	0
SO_C_20170719_R_1193.JPG	2017-07-19 13:09:04	58.44085278	-135.947925	222	Random	0	0	0	0	Good	LFT	2017-09-13	SO-2017.1	0
SO_C_20170719_R_1194.JPG	2017-07-19 13:09:05	58.44084722	-135.9471	223	Random	0	0	1	0	Good	LFT	2017-09-13	SO-2017.1	0
SO_C_20170719_R_1195.JPG	2017-07-19 13:09:06	58.44084444	-135.946275	223	Random	0	0	1	0	Good	LFT	2017-09-13	SO-2017.1	0
SO_C_20170719_R_1196.JPG	2017-07-19 13:09:07	58.44084444	-135.9454472	223	Random	0	0	0	0	Good	LFT	2017-09-13	SO-2017.1	0
SO_C_20170719_R_1197.JPG	2017-07-19 13:09:08	58.44084722	-135.9446222	224	Random	0	0	0	0	Good	LFT	2017-09-13	SO-2017.1	0
SO_C_20170719_R_1198.JPG	2017-07-19 13:09:09	58.44085278	-135.9437944	224	Random	0	0	0	0	Good	LFT	2017-09-13	SO-2017.1	0
SO_C_20170719_R_1199.JPG	2017-07-19 13:09:10	58.44086111	-135.9429639	224	Random	0	0	0	0	Good	LFT	2017-09-13	SO-2017.1	0
SO_C_20170719_R_1200.JPG	2017-07-19 13:09:11	58.440875	-135.9421306	224	Random	0	0	1	0	Good	LFT	2017-09-13	SO-2017.1	0
SO_C_20170719_R_1201.JPG	2017-07-19 13:09:12	58.44088889	-135.9412972	224	Random	0	0	1	0	Good	LFT	2017-09-14	SO-2017.1	0
SO_C_20170719_R_1202.JPG	2017-07-19 13:09:13	58.4409	-135.9404611	223	Random	0	0	0	0	Good	LFT	2017-09-14	SO-2017.1	0
SO_C_20170719_R_1203.JPG	2017-07-19 13:09:14	58.44091389	-135.9396222	223	Random	0	0	1	0	Good	LFT	2017-09-14	SO-2017.1	0
SO_C_20170719_R_1204.JPG	2017-07-19 13:09:15	58.44092222	-135.9387806	223	Random	0	0	0	0	Good	LFT	2017-09-14	SO-2017.1	0
SO_C_20170719_R_1205.JPG	2017-07-19 13:09:16	58.44093333	-135.9379389	222	Random	0	0	0	0	Good	LFT	2017-09-14	SO-2017.1	0
SO_C_20170719_R_1206.JPG	2017-07-19 13:09:17	58.44093889	-135.9370944	222	Random	0	0	0	0	Good	LFT	2017-09-14	SO-2017.1	0
SO_C_20170719_R_1207.JPG	2017-07-19 13:09:18	58.44094722	-135.9362472	222	Random	0	0	0	0	Good	LFT	2017-09-14	SO-2017.1	0
SO_C_20170719_R_1208.JPG	2017-07-19 13:09:19	58.44095	-135.9354	221	Random	0	0	0	0	Good	LFT	2017-09-14	SO-2017.1	0
SO_C_20170719_R_1209.JPG	2017-07-19 13:09:20	58.44095278	-135.9345528	222	Random	0	0	0	0	Good	LFT	2017-09-14	SO-2017.1	0
SO_C_20170719_R_1210.JPG	2017-07-19 13:09:21	58.44095556	-135.9337056	221	Random	0	0	0	0	Good	LFT	2017-09-14	SO-2017.1	0
SO_C_20170719_R_1211.JPG	2017-07-19 13:09:22	58.44095556	-135.9328556	221	Random	0	0	1	0	Good	LFT	2017-09-14	SO-2017.1	0
SO_C_20170719_R_1212.JPG	2017-07-19 13:09:23	58.44096111	-135.9320083	221	Random	0	0	1	0	Good	LFT	2017-09-14	SO-2017.1	0
SO_C_20170719_R_1213.JPG	2017-07-19 13:09:24	58.44096389	-135.9311611	222	Random	0	0	1	0	Good	LFT	2017-09-14	SO-2017.1	0
SO_C_20170719_R_1214.JPG	2017-07-19 13:09:25	58.44096944	-135.9303111	222	Random	0	0	1	0	Good	LFT	2017-09-14	SO-2017.1	0
SO_C_20170719_R_1215.JPG	2017-07-19 13:09:26	58.44097778	-135.9294611	222	Random	0	0	1	0	Good	LFT	2017-09-14	SO-2017.1	0
SO_C_20170719_R_1216.JPG	2017-07-19 13:09:27	58.44098333	-135.9286083	221	Random	0	0	1	0	Good	LFT	2017-09-14	SO-2017.1	0
SO_C_20170719_R_1217.JPG	2017-07-19 13:09:28	58.44098889	-135.9277556	221	Random	0	0	1	0	Good	LFT	2017-09-14	SO-2017.1	0
SO_C_20170719_R_1218.JPG	2017-07-19 13:09:29	58.44099444	-135.9269028	221	Random	0	0	1	0	Good	LFT	2017-09-14	SO-2017.1	0
SO_C_20170719_R_1219.JPG	2017-07-19 13:09:30	58.44099722	-135.9260472	222	Random	0	0	1	0	Good	LFT	2017-09-14	SO-2017.1	0
SO_C_20170719_R_1220.JPG	2017-07-19 13:09:31	58.44100278	-135.9251944	222	Random	0	0	1	0	Good	LFT	2017-09-14	SO-2017.1	0
SO_C_20170719_R_1221.JPG	2017-07-19 13:09:32	58.44100278	-135.9243417	223	Random	0	0	0	0	Good	LFT	2017-09-14	SO-2017.1	0
SO_C_20170719_R_1222.JPG	2017-07-19 13:09:33	58.44100556	-135.9234889	223	Random	0	0	0	0	Good	LFT	2017-09-14	SO-2017.1	0
SO_C_20170719_R_1223.JPG	2017-07-19 13:09:34	58.44100556	-135.9226361	224	Random	0	0	1	0	Good	LFT	2017-09-14	SO-2017.1	0
SO_C_20170719_R_1224.JPG	2017-07-19 13:09:35	58.44100833	-135.9217833	224	Random	0	0	1	0	Good	LFT	2017-09-14	SO-2017.1	0
SO_C_20170719_R_1225.JPG	2017-07-19 13:09:36	58.44101111	-135.9209333	224	Random	0	0	0	0	Good	LFT	2017-09-14	SO-2017.1	0
SO_C_20170719_R_1226.JPG	2017-07-19 13:09:37	58.44101667	-135.9200833	225	Random	0	0	1	0	Good	LFT	2017-09-14	SO-2017.1	0
SO_C_20170719_R_1227.JPG	2017-07-19 13:09:38	58.44102222	-135.9192306	225	Random	0	0	0	0	Good	LFT	2017-09-14	SO-2017.1	0
SO_C_20170719_R_1228.JPG	2017-07-19 13:09:39	58.44103333	-135.9183806	225	Random	0	0	0	0	Good	LFT	2017-09-14	SO-2017.1	0
SO_C_20170719_R_1229.JPG	2017-07-19 13:09:40	58.44104167	-135.9175306	225	Random	0	0	1	0	Good	LFT	2017-09-14	SO-2017.1	0
SO_C_20170719_R_1230.JPG	2017-07-19 13:09:41	58.44105278	-135.9166806	226	Random	0	0	0	0	Good	LFT	2017-09-14	SO-2017.1	0
SO_C_20170719_R_1231.JPG	2017-07-19 13:09:42	58.44106111	-135.9158278	226	Random	0	0	0	0	Good	LFT	2017-09-14	SO-2017.1	0
SO_C_20170719_R_1232.JPG	2017-07-19 13:09:43	58.44107222	-135.914975	226	Random	0	0	0	0	Good	LFT	2017-09-14	SO-2017.1	0
SO_C_20170719_R_1233.JPG	2017-07-19 13:09:44	58.44108333	-135.9141222	226	Random	0	0	0	0	Good	LFT	2017-09-14	SO-2017.1	0
SO_C_20170719_R_1234.JPG	2017-07-19 13:09:45	58.44109444	-135.9132667	227	Random	0	0	0	0	Good	LFT	2017-09-14	SO-2017.1	0
SO_C_20170719_R_1235.JPG	2017-07-19 13:09:46	58.44110278	-135.9124111	227	Random	0	0	0	0	Good	LFT	2017-09-14	SO-2017.1	0
SO_C_20170719_R_1236.JPG	2017-07-19 13:09:47	58.44111111	-135.9115556	226	Random	0	0	0	0	Good	LFT	2017-09-14	SO-2017.1	0
SO_C_20170719_R_1237.JPG	2017-07-19 13:09:48	58.44111944	-135.9106972	226	Random	0	0	0	0	Good	LFT	2017-09-14	SO-2017.1	0
SO_C_20170719_R_1238.JPG	2017-07-19 13:09:49	58.44112222	-135.9098389	227	Random	0	0	0	0	Good	LFT	2017-09-14	SO-2017.1	0
SO_C_20170719_R_1239.JPG	2017-07-19 13:09:50	58.44112222	-135.9089806	227	Random	0	0	0	0	Good	LFT	2017-09-14	SO-2017.1	0
SO_C_20170719_R_1240.JPG	2017-07-19 13:09:51	58.44111944	-135.9081194	227	Random	0	0	0	0	Good	LFT	2017-09-14	SO-2017.1	0
SO_C_20170719_R_1241.JPG	2017-07-19 13:09:52	58.44111389	-135.9072583	227	Random	0	0	0	0	Good	LFT	2017-09-14	SO-2017.1	0
SO_C_20170719_R_1242.JPG	2017-07-19 13:09:53	58.44110833	-135.9063972	227	Random	0	0	0	0	Good	LFT	2017-09-14	SO-2017.1	0
SO_C_20170719_R_1243.JPG	2017-07-19 13:09:54	58.4411	-135.9055306	227	Random	0	0	0	0	Good	LFT	2017-09-14	SO-2017.1	0
SO_C_20170719_R_1244.JPG	2017-07-19 13:09:55	58.44109167	-135.9046611	226	Random	0	0	0	0	Good	LFT	2017-09-14	SO-2017.1	0
SO_C_20170719_R_1245.JPG	2017-07-19 13:09:56	58.44108611	-135.9037861	225	Random	0	0	0	0	Good	LFT	2017-09-14	SO-2017.1	0
SO_C_20170719_R_1246.JPG	2017-07-19 13:09:57	58.441075	-135.9029083	224	Random	0	0	1	0	Good	LFT	2017-09-14	SO-2017.1	0
SO_C_20170719_R_1247.JPG	2017-07-19 13:09:58	58.44106667	-135.9020222	223	Random	0	0	1	0	Good	LFT	2017-09-14	SO-2017.1	0
SO_C_20170719_R_1248.JPG	2017-07-19 13:09:59	58.44105556	-135.9011361	221	Random	0	0	1	0	Good	LFT	2017-09-14	SO-2017.1	0
SO_C_20170719_R_1249.JPG	2017-07-19 13:10:00	58.44104167	-135.9002444	220	Random	0	0	1	1	Good	LFT	2017-09-14	SO-2017.1	0
SO_C_20170719_R_1250.JPG	2017-07-19 13:10:01	58.44102778	-135.8993556	220	Random	0	0	0	1	Good	LFT	2017-09-14	SO-2017.1	0
SO_C_20170719_R_1251.JPG	2017-07-19 13:10:02	58.44101389	-135.8984639	220	Random	0	0	0	1	Good	LFT	2017-09-14	SO-2017.1	0
SO_C_20170719_R_1252.JPG	2017-07-19 13:13:12	58.50809722	-135.8477722	232	Random	0	0	0	1	Good	LFT	2017-09-14	SO-2017.1	0
SO_C_20170719_R_1253.JPG	2017-07-19 13:13:13	58.50841667	-135.8483278	232	Random	0	0	0	1	Good	LFT	2017-09-14	SO-2017.1	0
SO_C_20170719_R_1254.JPG	2017-07-19 13:13:14	58.50873333	-135.8488917	232	Random	0	0	0	1	Good	LFT	2017-09-14	SO-2017.1	0
SO_C_20170719_R_1255.JPG	2017-07-19 13:13:15	58.50904167	-135.8494722	232	Random	0	0	0	1	Good	LFT	2017-09-14	SO-2017.1	0
SO_C_20170719_R_1256.JPG	2017-07-19 13:13:16	58.50934167	-135.8500694	231	Random	0	0	0	1	Good	LFT	2017-09-14	SO-2017.1	0
SO_C_20170719_R_1257.JPG	2017-07-19 13:13:17	58.50963333	-135.8506889	230	Random	0	0	0	1	Good	LFT	2017-09-14	SO-2017.1	0
SO_C_20170719_R_1258.JPG	2017-07-19 13:13:18	58.50991111	-135.8513333	229	Random	0	0	0	1	Good	LFT	2017-09-14	SO-2017.1	0
SO_C_20170719_R_1259.JPG	2017-07-19 13:13:19	58.51016667	-135.8520083	229	Random	0	0	0	1	Good	LFT	2017-09-14	SO-2017.1	0
SO_C_20170719_R_1260.JPG	2017-07-19 13:13:20	58.5104	-135.8527083	228	Random	0	0	0	1	Good	LFT	2017-09-14	SO-2017.1	0
SO_C_20170719_R_1261.JPG	2017-07-19 13:13:21	58.51060556	-135.8534417	228	Random	0	0	0	1	Good	LFT	2017-09-14	SO-2017.1	0
SO_C_20170719_R_1262.JPG	2017-07-19 13:13:22	58.51077778	-135.8542028	228	Random	0	0	0	1	Good	LFT	2017-09-14	SO-2017.1	0
SO_C_20170719_R_1263.JPG	2017-07-19 13:13:23	58.51091111	-135.8549889	227	Random	0	0	0	1	Good	LFT	2017-09-14	SO-2017.1	0
SO_C_20170719_R_1264.JPG	2017-07-19 13:13:24	58.51100278	-135.8557944	227	Random	0	0	1	1	Good	LFT	2017-09-14	SO-2017.1	0
SO_C_20170719_R_1265.JPG	2017-07-19 13:13:25	58.51105278	-135.8566111	226	Random	0	0	0	1	Good	LFT	2017-09-14	SO-2017.1	0
SO_C_20170719_R_1266.JPG	2017-07-19 13:13:26	58.51106389	-135.8574361	225	Random	0	0	0	1	Good	LFT	2017-09-14	SO-2017.1	0
SO_C_20170719_R_1267.JPG	2017-07-19 13:13:27	58.51103611	-135.8582556	225	Random	0	0	0	1	Good	LFT	2017-09-14	SO-2017.1	0
SO_C_20170719_R_1268.JPG	2017-07-19 13:13:28	58.51096944	-135.8590611	224	Random	0	0	0	1	Good	LFT	2017-09-14	SO-2017.1	0
SO_C_20170719_R_1269.JPG	2017-07-19 13:13:29	58.51086944	-135.8598528	223	Random	0	0	0	1	Good	LFT	2017-09-14	SO-2017.1	0
SO_C_20170719_R_1270.JPG	2017-07-19 13:13:30	58.51074167	-135.8606278	222	Random	0	0	0	1	Good	LFT	2017-09-14	SO-2017.1	0
SO_C_20170719_R_1271.JPG	2017-07-19 13:13:31	58.51059444	-135.8613917	220	Random	0	0	0	1	Good	LFT	2017-09-14	SO-2017.1	0
SO_C_20170719_R_1272.JPG	2017-07-19 13:13:32	58.51043889	-135.8621472	219	Random	0	0	0	1	Good	LFT	2017-09-14	SO-2017.1	0
SO_C_20170719_R_1273.JPG	2017-07-19 13:13:33	58.51028333	-135.8629028	218	Random	0	0	0	1	Good	LFT	2017-09-14	SO-2017.1	0
SO_C_20170719_R_1274.JPG	2017-07-19 13:13:34	58.51013333	-135.8636667	216	Random	0	0	0	1	Good	LFT	2017-09-14	SO-2017.1	0
SO_C_20170719_R_1275.JPG	2017-07-19 13:13:35	58.50999167	-135.8644389	216	Random	0	0	0	1	Good	LFT	2017-09-14	SO-2017.1	0
SO_C_20170719_R_1276.JPG	2017-07-19 13:13:36	58.50986111	-135.8652194	215	Random	0	0	0	1	Good	LFT	2017-09-14	SO-2017.1	0
SO_C_20170719_R_1277.JPG	2017-07-19 13:13:37	58.50974444	-135.8660139	214	Random	0	0	0	1	Good	LFT	2017-09-14	SO-2017.1	0
SO_C_20170719_R_1278.JPG	2017-07-19 13:13:38	58.50964444	-135.8668139	214	Random	0	0	0	1	Good	LFT	2017-09-14	SO-2017.1	0
SO_C_20170719_R_1279.JPG	2017-07-19 13:13:39	58.50956111	-135.867625	214	Random	0	0	0	1	Good	LFT	2017-09-14	SO-2017.1	0
SO_C_20170719_R_1280.JPG	2017-07-19 13:13:40	58.50949444	-135.8684444	215	Random	0	0	0	1	Good	LFT	2017-09-14	SO-2017.1	0
SO_C_20170719_R_1281.JPG	2017-07-19 13:13:41	58.50944167	-135.8692667	215	Random	0	0	0	1	Good	LFT	2017-09-14	SO-2017.1	0
SO_C_20170719_R_1282.JPG	2017-07-19 13:13:42	58.50940556	-135.8700889	215	Random	0	0	0	1	Good	LFT	2017-09-14	SO-2017.1	0
SO_C_20170719_R_1283.JPG	2017-07-19 13:13:43	58.50938333	-135.8709167	214	Random	0	0	0	1	Good	LFT	2017-09-14	SO-2017.1	0
SO_C_20170719_R_1284.JPG	2017-07-19 13:13:44	58.50936944	-135.8717444	212	Random	0	0	0	1	Good	LFT	2017-09-14	SO-2017.1	0
SO_C_20170719_R_1285.JPG	2017-07-19 13:13:45	58.50936111	-135.872575	211	Random	0	0	0	1	Good	LFT	2017-09-14	SO-2017.1	0
SO_C_20170719_R_1286.JPG	2017-07-19 13:13:46	58.50935833	-135.8734056	210	Random	0	0	0	1	Good	LFT	2017-09-14	SO-2017.1	0
SO_C_20170719_R_1287.JPG	2017-07-19 13:13:47	58.50935833	-135.8742333	208	Random	0	0	0	1	Good	LFT	2017-09-14	SO-2017.1	0
SO_C_20170719_R_1288.JPG	2017-07-19 13:13:48	58.50936111	-135.8750611	208	Random	0	0	0	1	Good	LFT	2017-09-14	SO-2017.1	0
SO_C_20170719_R_1289.JPG	2017-07-19 13:13:49	58.50936389	-135.8758833	208	Random	0	0	0	1	Good	LFT	2017-09-14	SO-2017.1	0
SO_C_20170719_R_1290.JPG	2017-07-19 13:13:50	58.50937222	-135.8767056	208	Random	0	0	0	0	Good	LFT	2017-09-14	SO-2017.1	0
SO_C_20170719_R_1291.JPG	2017-07-19 13:13:51	58.50938056	-135.8775222	210	Random	0	0	0	0	Good	LFT	2017-09-14	SO-2017.1	0
SO_C_20170719_R_1292.JPG	2017-07-19 13:13:52	58.50939444	-135.8783361	209	Random	0	0	0	0	Good	LFT	2017-09-14	SO-2017.1	0
SO_C_20170719_R_1293.JPG	2017-07-19 13:13:53	58.50941111	-135.8791444	210	Random	0	0	0	0	Good	LFT	2017-09-14	SO-2017.1	0
SO_C_20170719_R_1294.JPG	2017-07-19 13:13:54	58.50943056	-135.87995	211	Random	0	0	0	0	Good	LFT	2017-09-14	SO-2017.1	0
SO_C_20170719_R_1295.JPG	2017-07-19 13:13:55	58.50944444	-135.88075	212	Random	0	0	0	0	Good	LFT	2017-09-14	SO-2017.1	0
SO_C_20170719_R_1296.JPG	2017-07-19 13:13:56	58.50945833	-135.8815472	213	Random	0	0	0	0	Good	LFT	2017-09-14	SO-2017.1	0
SO_C_20170719_R_1297.JPG	2017-07-19 13:13:57	58.50947222	-135.8823417	214	Random	0	0	0	0	Good	LFT	2017-09-14	SO-2017.1	0
SO_C_20170719_R_1298.JPG	2017-07-19 13:13:58	58.50948333	-135.8831306	214	Random	0	0	0	0	Good	LFT	2017-09-14	SO-2017.1	0
SO_C_20170719_R_1299.JPG	2017-07-19 13:13:59	58.50949167	-135.8839194	216	Random	0	0	0	0	Good	LFT	2017-09-14	SO-2017.1	0
SO_C_20170719_R_1300.JPG	2017-07-19 13:14:00	58.5095	-135.8847056	217	Random	0	0	0	0	Good	LFT	2017-09-14	SO-2017.1	0
SO_C_20170719_R_1301.JPG	2017-07-19 13:14:01	58.50950556	-135.8854889	218	Random	0	0	0	0	Good	LFT	2017-09-14	SO-2017.1	0
SO_C_20170719_R_1302.JPG	2017-07-19 13:14:02	58.50950833	-135.8862778	217	Random	0	0	0	1	Good	LFT	2017-09-14	SO-2017.1	0
SO_C_20170719_R_1303.JPG	2017-07-19 13:14:03	58.50951111	-135.8870667	216	Random	0	0	0	1	Good	LFT	2017-09-14	SO-2017.1	0
SO_C_20170719_R_1304.JPG	2017-07-19 13:14:04	58.50951389	-135.8878611	217	Random	0	0	0	1	Good	LFT	2017-09-14	SO-2017.1	0
SO_C_20170719_R_1305.JPG	2017-07-19 13:14:05	58.50951111	-135.8886583	217	Random	0	0	0	1	Good	LFT	2017-09-14	SO-2017.1	0
SO_C_20170719_R_1306.JPG	2017-07-19 13:14:06	58.50950556	-135.8894583	216	Random	0	0	0	1	Good	LFT	2017-09-14	SO-2017.1	0
SO_C_20170719_R_1307.JPG	2017-07-19 13:14:07	58.50950278	-135.8902583	217	Random	0	0	0	1	Good	LFT	2017-09-14	SO-2017.1	0
SO_C_20170719_R_1308.JPG	2017-07-19 13:14:08	58.50949444	-135.8910639	215	Random	0	0	0	1	Good	LFT	2017-09-14	SO-2017.1	0
SO_C_20170719_R_1309.JPG	2017-07-19 13:14:09	58.50948611	-135.8918722	217	Random	0	0	0	1	Good	LFT	2017-09-14	SO-2017.1	0
SO_C_20170719_R_1310.JPG	2017-07-19 13:14:10	58.50946944	-135.8926806	217	Random	0	0	0	1	Good	LFT	2017-09-14	SO-2017.1	0
SO_C_20170719_R_1311.JPG	2017-07-19 13:14:11	58.50945	-135.8934917	219	Random	0	0	0	1	Good	LFT	2017-09-14	SO-2017.1	0
SO_C_20170719_R_1312.JPG	2017-07-19 13:14:12	58.50942778	-135.8943028	220	Random	0	0	0	1	Good	LFT	2017-09-14	SO-2017.1	0
SO_C_20170719_R_1313.JPG	2017-07-19 13:14:13	58.50940833	-135.8951139	222	Random	0	0	0	1	Good	LFT	2017-09-14	SO-2017.1	0
SO_C_20170719_R_1314.JPG	2017-07-19 13:14:14	58.50938889	-135.8959278	223	Random	0	0	0	1	Good	LFT	2017-09-14	SO-2017.1	0
SO_C_20170719_R_1315.JPG	2017-07-19 13:14:15	58.50937222	-135.8967389	223	Random	0	0	0	1	Good	LFT	2017-09-14	SO-2017.1	0
SO_C_20170719_R_1316.JPG	2017-07-19 13:14:16	58.50935278	-135.8975528	224	Random	0	0	0	1	Good	LFT	2017-09-14	SO-2017.1	0
SO_C_20170719_R_1317.JPG	2017-07-19 13:14:17	58.50933333	-135.8983667	225	Random	0	0	0	1	Good	LFT	2017-09-14	SO-2017.1	0
SO_C_20170719_R_1318.JPG	2017-07-19 13:14:18	58.50931389	-135.8991861	226	Random	0	0	0	1	Good	LFT	2017-09-14	SO-2017.1	0
SO_C_20170719_R_1319.JPG	2017-07-19 13:14:19	58.5093	-135.9000083	227	Random	0	0	0	1	Good	LFT	2017-09-14	SO-2017.1	0
SO_C_20170719_R_1320.JPG	2017-07-19 13:14:20	58.50929167	-135.9008361	226	Random	0	0	0	1	Good	LFT	2017-09-14	SO-2017.1	0
SO_C_20170719_R_1321.JPG	2017-07-19 13:14:21	58.50928056	-135.9016639	225	Random	0	0	0	1	Good	LFT	2017-09-14	SO-2017.1	0
SO_C_20170719_R_1322.JPG	2017-07-19 13:14:22	58.50926944	-135.9024944	224	Random	0	0	0	1	Good	LFT	2017-09-14	SO-2017.1	0
SO_C_20170719_R_1323.JPG	2017-07-19 13:14:23	58.50925833	-135.9033278	223	Random	0	0	0	1	Good	LFT	2017-09-14	SO-2017.1	0
SO_C_20170719_R_1324.JPG	2017-07-19 13:14:24	58.50924722	-135.9041611	222	Random	0	0	1	1	Good	LFT	2017-09-14	SO-2017.1	0
SO_C_20170719_R_1325.JPG	2017-07-19 13:14:25	58.50923889	-135.9049972	222	Random	0	0	1	0	Good	LFT	2017-09-14	SO-2017.1	0
SO_C_20170719_R_1326.JPG	2017-07-19 13:14:26	58.50922778	-135.9058333	221	Random	0	0	1	0	Good	LFT	2017-09-14	SO-2017.1	0
SO_C_20170719_R_1327.JPG	2017-07-19 13:14:27	58.50921389	-135.9066667	220	Random	0	0	1	0	Good	LFT	2017-09-14	SO-2017.1	0
SO_C_20170719_R_1328.JPG	2017-07-19 13:14:28	58.50919722	-135.9074972	221	Random	0	0	1	0	Good	LFT	2017-09-14	SO-2017.1	0
SO_C_20170719_R_1329.JPG	2017-07-19 13:14:29	58.50918333	-135.9083222	222	Random	0	0	1	0	Good	LFT	2017-09-14	SO-2017.1	0
SO_C_20170719_R_1330.JPG	2017-07-19 13:14:30	58.50917222	-135.9091444	223	Random	0	0	1	0	Good	LFT	2017-09-14	SO-2017.1	0
SO_C_20170719_R_1331.JPG	2017-07-19 13:14:31	58.50916111	-135.9099639	225	Random	0	0	1	0	Good	LFT	2017-09-14	SO-2017.1	0
SO_C_20170719_R_1332.JPG	2017-07-19 13:14:32	58.50915556	-135.9107778	225	Random	0	0	1	0	Good	LFT	2017-09-14	SO-2017.1	0
SO_C_20170719_R_1333.JPG	2017-07-19 13:14:33	58.50915	-135.9115889	226	Random	0	0	0	0	Good	LFT	2017-09-14	SO-2017.1	0
SO_C_20170719_R_1334.JPG	2017-07-19 13:14:34	58.50914722	-135.9124	227	Random	0	0	0	0	Good	LFT	2017-09-14	SO-2017.1	0
SO_C_20170719_R_1335.JPG	2017-07-19 13:14:35	58.50914444	-135.9132111	227	Random	0	0	0	0	Good	LFT	2017-09-14	SO-2017.1	0
SO_C_20170719_R_1336.JPG	2017-07-19 13:14:36	58.50914722	-135.914025	227	Random	0	0	0	0	Good	LFT	2017-09-14	SO-2017.1	0
SO_C_20170719_R_1337.JPG	2017-07-19 13:14:37	58.50915	-135.9148389	227	Random	0	0	0	0	Good	LFT	2017-09-14	SO-2017.1	0
SO_C_20170719_R_1338.JPG	2017-07-19 13:14:38	58.50915556	-135.9156556	227	Random	0	0	0	0	Good	LFT	2017-09-14	SO-2017.1	0
SO_C_20170719_R_1339.JPG	2017-07-19 13:14:39	58.50916389	-135.916475	227	Random	0	0	0	0	Good	LFT	2017-09-14	SO-2017.1	0
SO_C_20170719_R_1340.JPG	2017-07-19 13:14:40	58.50917222	-135.9172972	226	Random	0	0	1	0	Good	LFT	2017-09-14	SO-2017.1	0
SO_C_20170719_R_1341.JPG	2017-07-19 13:14:41	58.50918056	-135.9181222	225	Random	0	0	0	0	Good	LFT	2017-09-14	SO-2017.1	0
SO_C_20170719_R_1342.JPG	2017-07-19 13:14:42	58.50918889	-135.9189472	224	Random	0	0	0	0	Good	LFT	2017-09-14	SO-2017.1	0
SO_C_20170719_R_1343.JPG	2017-07-19 13:14:43	58.50919722	-135.9197778	223	Random	0	0	0	0	Good	LFT	2017-09-14	SO-2017.1	0
SO_C_20170719_R_1344.JPG	2017-07-19 13:14:44	58.5092	-135.9206111	222	Random	0	0	0	0	Good	LFT	2017-09-14	SO-2017.1	0
SO_C_20170719_R_1345.JPG	2017-07-19 13:14:45	58.50920278	-135.9214444	222	Random	0	0	0	0	Good	LFT	2017-09-14	SO-2017.1	0
SO_C_20170719_R_1346.JPG	2017-07-19 13:14:46	58.5092	-135.9222778	221	Random	0	0	0	0	Good	LFT	2017-09-14	SO-2017.1	0
SO_C_20170719_R_1347.JPG	2017-07-19 13:14:47	58.50919167	-135.9231111	221	Random	0	0	0	0	Good	LFT	2017-09-14	SO-2017.1	0
SO_C_20170719_R_1348.JPG	2017-07-19 13:14:48	58.50918056	-135.9239417	221	Random	0	0	0	0	Good	LFT	2017-09-14	SO-2017.1	0
SO_C_20170719_R_1349.JPG	2017-07-19 13:14:49	58.50917222	-135.9247694	222	Random	0	0	0	0	Good	LFT	2017-09-14	SO-2017.1	0
SO_C_20170719_R_1350.JPG	2017-07-19 13:14:50	58.50916111	-135.9255972	222	Random	0	0	1	0	Good	LFT	2017-09-14	SO-2017.1	0
SO_C_20170719_R_1351.JPG	2017-07-19 13:14:51	58.50915	-135.9264222	223	Random	0	0	1	1	Good	LFT	2017-09-14	SO-2017.1	0
SO_C_20170719_R_1352.JPG	2017-07-19 13:14:52	58.50913889	-135.9272444	223	Random	0	0	1	1	Good	LFT	2017-09-14	SO-2017.1	0
SO_C_20170719_R_1353.JPG	2017-07-19 13:14:53	58.509125	-135.9280667	223	Random	0	0	0	1	Good	LFT	2017-09-14	SO-2017.1	0
SO_C_20170719_R_1354.JPG	2017-07-19 13:14:54	58.50911389	-135.9288861	223	Random	0	0	0	1	Good	LFT	2017-09-14	SO-2017.1	0
SO_C_20170719_R_1355.JPG	2017-07-19 13:14:55	58.50910556	-135.9297083	224	Random	0	0	0	1	Good	LFT	2017-09-14	SO-2017.1	0
SO_C_20170719_R_1356.JPG	2017-07-19 13:14:56	58.50909722	-135.9305306	224	Random	0	0	0	1	Good	LFT	2017-09-14	SO-2017.1	0
SO_C_20170719_R_1357.JPG	2017-07-19 13:14:57	58.50909167	-135.9313528	224	Random	0	0	1	1	Good	LFT	2017-09-14	SO-2017.1	0
SO_C_20170719_R_1358.JPG	2017-07-19 13:14:58	58.50908611	-135.932175	224	Random	0	0	1	0	Good	LFT	2017-09-14	SO-2017.1	0
SO_C_20170719_R_1359.JPG	2017-07-19 13:14:59	58.50907778	-135.933	223	Random	0	0	1	0	Good	LFT	2017-09-14	SO-2017.1	0
SO_C_20170719_R_1360.JPG	2017-07-19 13:15:00	58.50906944	-135.933825	223	Random	0	0	1	0	Good	LFT	2017-09-14	SO-2017.1	0
SO_C_20170719_R_1361.JPG	2017-07-19 13:15:01	58.50906111	-135.9346528	222	Random	0	0	0	0	Good	LFT	2017-09-14	SO-2017.1	0
SO_C_20170719_R_1362.JPG	2017-07-19 13:15:02	58.50905	-135.9354806	222	Random	0	0	0	0	Good	LFT	2017-09-14	SO-2017.1	0
SO_C_20170719_R_1363.JPG	2017-07-19 13:15:03	58.50903611	-135.9363139	221	Random	0	0	0	0	Good	LFT	2017-09-14	SO-2017.1	0
SO_C_20170719_R_1364.JPG	2017-07-19 13:15:04	58.509025	-135.9371472	220	Random	0	0	0	0	Good	LFT	2017-09-14	SO-2017.1	0
SO_C_20170719_R_1365.JPG	2017-07-19 13:15:05	58.50901389	-135.9379833	219	Random	0	0	0	0	Good	LFT	2017-09-14	SO-2017.1	0
SO_C_20170719_R_1366.JPG	2017-07-19 13:15:06	58.509	-135.9388167	218	Random	0	0	0	0	Good	LFT	2017-09-14	SO-2017.1	0
SO_C_20170719_R_1367.JPG	2017-07-19 13:15:07	58.50898333	-135.9396528	218	Random	0	0	0	0	Good	LFT	2017-09-14	SO-2017.1	0
SO_C_20170719_R_1368.JPG	2017-07-19 13:15:08	58.50896944	-135.9404833	218	Random	0	0	1	0	Good	LFT	2017-09-14	SO-2017.1	0
SO_C_20170719_R_1369.JPG	2017-07-19 13:15:09	58.50895556	-135.9413139	220	Random	0	0	1	0	Good	LFT	2017-09-14	SO-2017.1	0
SO_C_20170719_R_1370.JPG	2017-07-19 13:15:10	58.50894444	-135.9421389	220	Random	0	0	1	0	Good	LFT	2017-09-14	SO-2017.1	0
SO_C_20170719_R_1371.JPG	2017-07-19 13:15:11	58.50893611	-135.9429611	221	Random	0	0	1	0	Good	LFT	2017-09-14	SO-2017.1	0
SO_C_20170719_R_1372.JPG	2017-07-19 13:15:12	58.50893056	-135.9437806	222	Random	0	0	1	0	Good	LFT	2017-09-14	SO-2017.1	0
SO_C_20170719_R_1373.JPG	2017-07-19 13:15:13	58.50892222	-135.9445944	222	Random	0	0	0	0	Good	LFT	2017-09-14	SO-2017.1	0
SO_C_20170719_R_1374.JPG	2017-07-19 13:15:14	58.50891667	-135.9454083	224	Random	0	0	1	0	Good	LFT	2017-09-14	SO-2017.1	0
SO_C_20170719_R_1375.JPG	2017-07-19 13:15:15	58.50891389	-135.9462222	223	Random	0	0	1	0	Good	LFT	2017-09-14	SO-2017.1	0
SO_C_20170719_R_1376.JPG	2017-07-19 13:15:16	58.50891111	-135.9470333	223	Random	0	0	1	0	Good	LFT	2017-09-14	SO-2017.1	0
SO_C_20170719_R_1377.JPG	2017-07-19 13:15:17	58.50891111	-135.9478472	223	Random	0	0	1	0	Good	LFT	2017-09-14	SO-2017.1	0
SO_C_20170719_R_1378.JPG	2017-07-19 13:15:18	58.50891111	-135.9486639	223	Random	0	0	0	0	Good	LFT	2017-09-14	SO-2017.1	0
SO_C_20170719_R_1379.JPG	2017-07-19 13:15:19	58.50891389	-135.9494778	223	Random	0	0	0	0	Good	LFT	2017-09-14	SO-2017.1	0
SO_C_20170719_R_1380.JPG	2017-07-19 13:15:20	58.50891667	-135.9502972	222	Random	0	0	1	0	Good	LFT	2017-09-14	SO-2017.1	0
SO_C_20170719_R_1381.JPG	2017-07-19 13:15:21	58.50891944	-135.9511167	222	Random	0	0	0	0	Good	LFT	2017-09-14	SO-2017.1	0
SO_C_20170719_R_1382.JPG	2017-07-19 13:15:22	58.50891944	-135.9519361	221	Random	0	0	0	0	Good	LFT	2017-09-14	SO-2017.1	0
SO_C_20170719_R_1383.JPG	2017-07-19 13:15:23	58.50891667	-135.9527583	221	Random	0	0	0	0	Good	LFT	2017-09-14	SO-2017.1	0
SO_C_20170719_R_1384.JPG	2017-07-19 13:15:24	58.50891389	-135.9535806	221	Random	0	0	0	0	Good	LFT	2017-09-14	SO-2017.1	0
SO_C_20170719_R_1385.JPG	2017-07-19 13:15:25	58.50891389	-135.9544028	220	Random	0	0	0	0	Good	LFT	2017-09-14	SO-2017.1	0
SO_C_20170719_R_1386.JPG	2017-07-19 13:15:26	58.50891111	-135.955225	221	Random	1	0	1	0	Good	LFT	2017-09-26	SO-2017.1	0
SO_C_20170719_R_1387.JPG	2017-07-19 13:15:27	58.50891111	-135.9560472	220	Random	0	0	1	0	Good	LFT	2017-09-14	SO-2017.1	0
SO_C_20170719_R_1388.JPG	2017-07-19 13:15:28	58.50890833	-135.9568667	220	Random	0	0	1	0	Good	LFT	2017-09-14	SO-2017.1	0
SO_C_20170719_R_1389.JPG	2017-07-19 13:15:29	58.50890833	-135.9576861	220	Random	0	0	1	0	Good	LFT	2017-09-14	SO-2017.1	0
SO_C_20170719_R_1390.JPG	2017-07-19 13:15:30	58.50890833	-135.9585028	221	Random	0	0	1	0	Good	LFT	2017-09-14	SO-2017.1	0
SO_C_20170719_R_1391.JPG	2017-07-19 13:15:31	58.50891111	-135.9593194	221	Random	0	0	1	0	Good	LFT	2017-09-14	SO-2017.1	0
SO_C_20170719_R_1392.JPG	2017-07-19 13:15:32	58.50891389	-135.9601306	221	Random	0	0	1	0	Good	LFT	2017-09-14	SO-2017.1	0
SO_C_20170719_R_1393.JPG	2017-07-19 13:15:33	58.50891667	-135.9609417	222	Random	0	0	1	0	Good	LFT	2017-09-14	SO-2017.1	0
SO_C_20170719_R_1394.JPG	2017-07-19 13:15:34	58.50891944	-135.9617528	222	Random	0	0	0	0	Good	LFT	2017-09-14	SO-2017.1	0
SO_C_20170719_R_1395.JPG	2017-07-19 13:15:35	58.50892222	-135.9625611	222	Random	0	0	1	0	Good	LFT	2017-09-14	SO-2017.1	0
SO_C_20170719_R_1396.JPG	2017-07-19 13:15:36	58.50892778	-135.9633694	222	Random	0	0	1	0	Good	LFT	2017-09-14	SO-2017.1	0
SO_C_20170719_R_1397.JPG	2017-07-19 13:15:37	58.50893056	-135.9641778	222	Random	0	0	1	0	Good	LFT	2017-09-14	SO-2017.1	0
SO_C_20170719_R_1398.JPG	2017-07-19 13:15:38	58.50893333	-135.9649861	222	Random	0	0	1	0	Good	LFT	2017-09-14	SO-2017.1	0
SO_C_20170719_R_1399.JPG	2017-07-19 13:15:39	58.50893611	-135.9657972	222	Random	0	0	1	0	Good	LFT	2017-09-14	SO-2017.1	0
SO_C_20170719_R_1400.JPG	2017-07-19 13:15:40	58.50893611	-135.9666083	221	Random	0	0	0	0	Good	LFT	2017-09-14	SO-2017.1	0
SO_C_20170719_R_1401.JPG	2017-07-19 13:15:41	58.50893333	-135.9674194	222	Random	0	0	0	0	Good	LFT	2017-09-14	SO-2017.1	0
SO_C_20170719_R_1402.JPG	2017-07-19 13:15:42	58.50892778	-135.9682306	221	Random	0	0	0	0	Good	LFT	2017-09-14	SO-2017.1	0
SO_C_20170719_R_1403.JPG	2017-07-19 13:15:43	58.50891944	-135.9690444	221	Random	0	0	0	0	Good	LFT	2017-09-14	SO-2017.1	0
SO_C_20170719_R_1404.JPG	2017-07-19 13:15:44	58.50890833	-135.9698556	221	Random	0	0	0	0	Good	LFT	2017-09-14	SO-2017.1	0
SO_C_20170719_R_1405.JPG	2017-07-19 13:15:45	58.50889444	-135.9706694	221	Random	0	0	0	0	Good	LFT	2017-09-14	SO-2017.1	0
SO_C_20170719_R_1406.JPG	2017-07-19 13:15:46	58.50887778	-135.9714806	221	Random	0	0	1	0	Good	LFT	2017-09-14	SO-2017.1	0
SO_C_20170719_R_1407.JPG	2017-07-19 13:15:47	58.50886389	-135.9722944	221	Random	0	0	0	0	Good	LFT	2017-09-14	SO-2017.1	0
SO_C_20170719_R_1408.JPG	2017-07-19 13:15:48	58.50884722	-135.9731056	220	Random	0	0	0	0	Good	LFT	2017-09-14	SO-2017.1	0
SO_C_20170719_R_1409.JPG	2017-07-19 13:15:49	58.50883056	-135.9739167	221	Random	0	0	0	0	Good	LFT	2017-09-14	SO-2017.1	0
SO_C_20170719_R_1410.JPG	2017-07-19 13:15:50	58.50881667	-135.9747278	221	Random	0	0	0	0	Good	LFT	2017-09-14	SO-2017.1	0
SO_C_20170719_R_1411.JPG	2017-07-19 13:15:51	58.50880278	-135.9755361	222	Random	0	0	0	0	Good	LFT	2017-09-14	SO-2017.1	0
SO_C_20170719_R_1412.JPG	2017-07-19 13:15:52	58.50878889	-135.9763472	222	Random	0	0	0	0	Good	LFT	2017-09-14	SO-2017.1	0
SO_C_20170719_R_1413.JPG	2017-07-19 13:15:53	58.50877778	-135.9771556	222	Random	0	0	1	0	Good	LFT	2017-09-14	SO-2017.1	0
SO_C_20170719_R_1414.JPG	2017-07-19 13:15:54	58.50876944	-135.9779639	222	Random	0	0	1	0	Good	LFT	2017-09-14	SO-2017.1	0
SO_C_20170719_R_1415.JPG	2017-07-19 13:15:55	58.50876667	-135.9787722	222	Random	0	0	0	0	Good	LFT	2017-09-14	SO-2017.1	0
SO_C_20170719_R_1416.JPG	2017-07-19 13:15:56	58.50876389	-135.9795833	222	Random	0	0	0	0	Good	LFT	2017-09-14	SO-2017.1	0
SO_C_20170719_R_1417.JPG	2017-07-19 13:15:57	58.50876389	-135.9803944	222	Random	0	0	0	0	Good	LFT	2017-09-14	SO-2017.1	0
SO_C_20170719_R_1418.JPG	2017-07-19 13:15:58	58.50876389	-135.9812083	222	Random	0	0	0	0	Good	LFT	2017-09-14	SO-2017.1	0
SO_C_20170719_R_1419.JPG	2017-07-19 13:15:59	58.50876389	-135.9820222	221	Random	0	0	0	0	Good	LFT	2017-09-14	SO-2017.1	0
SO_C_20170719_R_1420.JPG	2017-07-19 13:16:00	58.50876944	-135.9828361	222	Random	0	0	0	0	Good	LFT	2017-09-14	SO-2017.1	0
SO_C_20170719_R_1421.JPG	2017-07-19 13:16:01	58.50877222	-135.9836528	221	Random	1	0	1	0	Good	LFT	2017-09-26	SO-2017.1	0
SO_C_20170719_R_1422.JPG	2017-07-19 13:16:02	58.50877778	-135.9844667	222	Random	0	0	1	0	Good	LFT	2017-09-14	SO-2017.1	0
SO_C_20170719_R_1423.JPG	2017-07-19 13:16:03	58.50878611	-135.9852833	222	Random	0	0	0	0	Good	LFT	2017-09-14	SO-2017.1	0
SO_C_20170719_R_1424.JPG	2017-07-19 13:16:04	58.50879444	-135.9860972	222	Random	0	0	0	0	Good	LFT	2017-09-14	SO-2017.1	0
SO_C_20170719_R_1425.JPG	2017-07-19 13:16:05	58.50880278	-135.9869111	221	Random	0	0	0	0	Good	LFT	2017-09-14	SO-2017.1	0
SO_C_20170719_R_1426.JPG	2017-07-19 13:16:06	58.50880833	-135.987725	222	Random	0	0	0	0	Good	LFT	2017-09-14	SO-2017.1	0
SO_C_20170719_R_1427.JPG	2017-07-19 13:16:07	58.50881111	-135.9885389	222	Random	0	0	0	0	Good	LFT	2017-09-14	SO-2017.1	0
SO_C_20170719_R_1428.JPG	2017-07-19 13:16:08	58.50881389	-135.9893528	222	Random	0	0	0	0	Good	LFT	2017-09-14	SO-2017.1	0
SO_C_20170719_R_1429.JPG	2017-07-19 13:16:09	58.50881667	-135.9901667	221	Random	0	0	0	0	Good	LFT	2017-09-14	SO-2017.1	0
SO_C_20170719_R_1430.JPG	2017-07-19 13:16:10	58.50881944	-135.9909833	221	Random	0	0	1	0	Good	LFT	2017-09-14	SO-2017.1	0
SO_C_20170719_R_1431.JPG	2017-07-19 13:16:11	58.50881944	-135.9918	221	Random	0	0	0	0	Good	LFT	2017-09-14	SO-2017.1	0
SO_C_20170719_R_1432.JPG	2017-07-19 13:16:12	58.50881667	-135.9926194	221	Random	0	0	1	0	Good	LFT	2017-09-14	SO-2017.1	0
SO_C_20170719_R_1433.JPG	2017-07-19 13:16:13	58.50881667	-135.9934389	220	Random	0	0	1	0	Good	LFT	2017-09-14	SO-2017.1	0
SO_C_20170719_R_1434.JPG	2017-07-19 13:16:14	58.50881111	-135.9942583	220	Random	0	0	0	0	Good	LFT	2017-09-14	SO-2017.1	0
SO_C_20170719_R_1435.JPG	2017-07-19 13:16:15	58.50880556	-135.9950806	220	Random	0	0	1	0	Good	LFT	2017-09-14	SO-2017.1	0
SO_C_20170719_R_1436.JPG	2017-07-19 13:16:16	58.50879444	-135.9959028	220	Random	0	0	1	0	Good	LFT	2017-09-14	SO-2017.1	0
SO_C_20170719_R_1437.JPG	2017-07-19 13:16:17	58.50878333	-135.9967222	220	Random	0	0	1	0	Good	LFT	2017-09-14	SO-2017.1	0
SO_C_20170719_R_1438.JPG	2017-07-19 13:16:18	58.50876944	-135.9975417	220	Random	0	0	1	1	Good	LFT	2017-09-14	SO-2017.1	0
SO_C_20170719_R_1439.JPG	2017-07-19 13:16:19	58.50875556	-135.9983583	220	Random	0	0	0	1	Good	LFT	2017-09-14	SO-2017.1	0
SO_C_20170719_R_1440.JPG	2017-07-19 13:16:20	58.50874167	-135.9991778	220	Random	0	0	0	1	Good	LFT	2017-09-14	SO-2017.1	0
SO_C_20170719_R_1441.JPG	2017-07-19 13:16:21	58.50872778	-135.9999944	221	Random	0	0	0	1	Good	LFT	2017-09-14	SO-2017.1	0
SO_C_20170719_R_1442.JPG	2017-07-19 13:16:22	58.50871667	-136.0008111	221	Random	0	0	0	1	Good	LFT	2017-09-14	SO-2017.1	0
SO_C_20170719_R_1443.JPG	2017-07-19 13:16:23	58.50870556	-136.001625	221	Random	0	0	0	1	Good	LFT	2017-09-14	SO-2017.1	0
SO_C_20170719_R_1444.JPG	2017-07-19 13:16:24	58.50869444	-136.0024389	221	Random	0	0	0	1	Good	LFT	2017-09-14	SO-2017.1	0
SO_C_20170719_R_1445.JPG	2017-07-19 13:16:25	58.50868333	-136.0032528	221	Random	0	0	0	1	Good	LFT	2017-09-14	SO-2017.1	0
SO_C_20170719_R_1446.JPG	2017-07-19 13:16:26	58.50867222	-136.0040667	221	Random	0	0	0	1	Good	LFT	2017-09-14	SO-2017.1	0
SO_C_20170719_R_1447.JPG	2017-07-19 13:16:27	58.50866389	-136.0048806	221	Random	0	0	0	1	Good	LFT	2017-09-14	SO-2017.1	0
SO_C_20170719_R_1448.JPG	2017-07-19 13:16:28	58.50865556	-136.0056972	221	Random	0	0	0	1	Good	LFT	2017-09-14	SO-2017.1	0
SO_C_20170719_R_1449.JPG	2017-07-19 13:16:29	58.50865	-136.0065167	221	Random	0	0	0	1	Good	LFT	2017-09-14	SO-2017.1	0
SO_C_20170719_R_1450.JPG	2017-07-19 13:16:30	58.50864444	-136.0073389	220	Random	0	0	0	1	Good	LFT	2017-09-14	SO-2017.1	0
SO_C_20170719_R_1451.JPG	2017-07-19 13:16:31	58.50863889	-136.0081611	220	Random	0	0	0	1	Good	LFT	2017-09-14	SO-2017.1	0
SO_C_20170719_R_1452.JPG	2017-07-19 13:16:32	58.50863333	-136.0089861	220	Random	0	0	0	1	Good	LFT	2017-09-14	SO-2017.1	0
SO_C_20170719_R_1453.JPG	2017-07-19 13:16:33	58.50862778	-136.0098111	220	Random	0	0	0	1	Good	LFT	2017-09-14	SO-2017.1	0
SO_C_20170719_R_1454.JPG	2017-07-19 13:16:34	58.50861944	-136.0106361	220	Random	0	0	0	1	Good	LFT	2017-09-14	SO-2017.1	0
SO_C_20170719_R_1455.JPG	2017-07-19 13:16:35	58.50861111	-136.0114583	221	Random	0	0	0	1	Good	LFT	2017-09-14	SO-2017.1	0
SO_C_20170719_R_1456.JPG	2017-07-19 13:16:36	58.50860278	-136.0122806	221	Random	0	0	0	1	Good	LFT	2017-09-14	SO-2017.1	0
SO_C_20170719_R_1457.JPG	2017-07-19 13:16:37	58.50859444	-136.0131	221	Random	0	0	0	1	Good	LFT	2017-09-14	SO-2017.1	0
SO_C_20170719_R_1458.JPG	2017-07-19 13:16:38	58.50858611	-136.0139194	222	Random	0	0	0	1	Good	LFT	2017-09-14	SO-2017.1	0
SO_C_20170719_R_1459.JPG	2017-07-19 13:16:39	58.50857778	-136.0147389	222	Random	0	0	0	1	Good	LFT	2017-09-14	SO-2017.1	0
SO_C_20170719_R_1460.JPG	2017-07-19 13:16:40	58.50857222	-136.0155611	222	Random	0	0	0	1	Good	LFT	2017-09-14	SO-2017.1	0
SO_C_20170719_R_1461.JPG	2017-07-19 13:16:41	58.50856667	-136.0163833	222	Random	0	0	0	1	Good	LFT	2017-09-14	SO-2017.1	0
SO_C_20170719_R_1462.JPG	2017-07-19 13:16:42	58.50856111	-136.0172056	222	Random	0	0	0	1	Good	LFT	2017-09-14	SO-2017.1	0
SO_C_20170719_R_1463.JPG	2017-07-19 13:16:43	58.50855833	-136.0180306	223	Random	0	0	0	1	Good	LFT	2017-09-14	SO-2017.1	0
SO_C_20170719_R_1464.JPG	2017-07-19 13:16:44	58.50855833	-136.0188556	223	Random	0	0	0	1	Good	LFT	2017-09-14	SO-2017.1	0
SO_C_20170719_R_1465.JPG	2017-07-19 13:16:45	58.50855833	-136.0196806	223	Random	0	0	0	1	Good	LFT	2017-09-14	SO-2017.1	0
SO_C_20170719_R_1466.JPG	2017-07-19 13:16:46	58.50855833	-136.0205083	223	Random	0	0	0	1	Good	LFT	2017-09-14	SO-2017.1	0
SO_C_20170719_R_1467.JPG	2017-07-19 13:16:47	58.50855556	-136.0213361	223	Random	0	0	0	1	Good	LFT	2017-09-14	SO-2017.1	0
SO_C_20170719_R_1468.JPG	2017-07-19 13:16:48	58.50855278	-136.0221639	223	Random	0	0	0	1	Good	LFT	2017-09-14	SO-2017.1	0
SO_C_20170719_R_1469.JPG	2017-07-19 13:16:49	58.50855	-136.0229917	223	Random	0	0	0	1	Good	LFT	2017-09-14	SO-2017.1	0
SO_C_20170719_R_1470.JPG	2017-07-19 13:16:50	58.50854444	-136.0238194	223	Random	0	0	0	1	Good	LFT	2017-09-14	SO-2017.1	0
SO_C_20170719_R_1471.JPG	2017-07-19 13:16:51	58.50853889	-136.02465	223	Random	0	0	0	1	Good	LFT	2017-09-14	SO-2017.1	0
SO_C_20170719_R_1472.JPG	2017-07-19 13:16:52	58.50853056	-136.0254806	224	Random	0	0	0	1	Good	LFT	2017-09-14	SO-2017.1	0
SO_C_20170719_R_1473.JPG	2017-07-19 13:16:53	58.50852222	-136.0263111	224	Random	0	0	0	1	Good	LFT	2017-09-14	SO-2017.1	0
SO_C_20170719_R_1474.JPG	2017-07-19 13:16:54	58.50851111	-136.0271417	225	Random	0	0	0	1	Good	LFT	2017-09-14	SO-2017.1	0
SO_C_20170719_R_1475.JPG	2017-07-19 13:16:55	58.50850278	-136.0279722	225	Random	0	0	1	1	Good	LFT	2017-09-14	SO-2017.1	0
SO_C_20170719_R_1476.JPG	2017-07-19 13:16:56	58.50849444	-136.0288056	226	Random	1	0	1	0	Good	LFT	2017-09-26	SO-2017.1	0
SO_C_20170719_R_1477.JPG	2017-07-19 13:16:57	58.50848611	-136.0296361	226	Random	0	0	1	0	Good	LFT	2017-09-14	SO-2017.1	0
SO_C_20170719_R_1478.JPG	2017-07-19 13:16:58	58.508475	-136.0304694	226	Random	0	0	1	0	Good	LFT	2017-09-14	SO-2017.1	0
SO_C_20170719_R_1479.JPG	2017-07-19 13:16:59	58.50846389	-136.0313028	226	Random	0	0	1	0	Good	LFT	2017-09-14	SO-2017.1	0
SO_C_20170719_R_1480.JPG	2017-07-19 13:17:00	58.50845278	-136.0321361	227	Random	0	0	0	0	Good	LFT	2017-09-14	SO-2017.1	0
SO_C_20170719_R_1481.JPG	2017-07-19 13:17:01	58.50844167	-136.0329722	227	Random	0	0	0	0	Good	LFT	2017-09-14	SO-2017.1	0
SO_C_20170719_R_1482.JPG	2017-07-19 13:17:02	58.50842778	-136.0338083	226	Random	0	0	0	0	Good	LFT	2017-09-14	SO-2017.1	0
SO_C_20170719_R_1483.JPG	2017-07-19 13:17:03	58.50841944	-136.03465	226	Random	0	0	0	0	Good	LFT	2017-09-14	SO-2017.1	0
SO_C_20170719_R_1484.JPG	2017-07-19 13:17:04	58.50840833	-136.0354917	226	Random	0	0	0	0	Good	LFT	2017-09-14	SO-2017.1	0
SO_C_20170719_R_1485.JPG	2017-07-19 13:17:05	58.5084	-136.0363361	225	Random	0	0	0	0	Good	LFT	2017-09-14	SO-2017.1	0
SO_C_20170719_R_1486.JPG	2017-07-19 13:17:06	58.50838611	-136.0371833	225	Random	0	0	0	0	Good	LFT	2017-09-14	SO-2017.1	0
SO_C_20170719_R_1487.JPG	2017-07-19 13:17:07	58.50837222	-136.0380333	225	Random	0	0	0	0	Good	LFT	2017-09-14	SO-2017.1	0
SO_C_20170719_R_1488.JPG	2017-07-19 13:17:08	58.50835556	-136.0388806	224	Random	0	0	0	0	Good	LFT	2017-09-14	SO-2017.1	0
SO_C_20170719_R_1489.JPG	2017-07-19 13:17:09	58.50833889	-136.0397306	224	Random	0	0	0	0	Good	LFT	2017-09-14	SO-2017.1	0
SO_C_20170719_R_1490.JPG	2017-07-19 13:17:10	58.50832222	-136.0405778	224	Random	0	0	0	0	Good	LFT	2017-09-14	SO-2017.1	0
SO_C_20170719_R_1491.JPG	2017-07-19 13:17:11	58.50830833	-136.0414278	224	Random	0	0	0	0	Good	LFT	2017-09-14	SO-2017.1	0
SO_C_20170719_R_1492.JPG	2017-07-19 13:17:12	58.50829722	-136.042275	225	Random	0	0	0	0	Good	LFT	2017-09-14	SO-2017.1	0
SO_C_20170719_R_1493.JPG	2017-07-19 13:17:13	58.50829167	-136.0431222	225	Random	0	0	0	0	Good	LFT	2017-09-14	SO-2017.1	0
SO_C_20170719_R_1494.JPG	2017-07-19 13:17:14	58.50829167	-136.0439694	225	Random	0	0	0	0	Good	LFT	2017-09-14	SO-2017.1	0
SO_C_20170719_R_1495.JPG	2017-07-19 13:17:15	58.50829167	-136.0448139	226	Random	0	0	0	0	Good	LFT	2017-09-14	SO-2017.1	0
SO_C_20170719_R_1496.JPG	2017-07-19 13:17:16	58.50829444	-136.0456583	226	Random	0	0	0	0	Good	LFT	2017-09-14	SO-2017.1	0
SO_C_20170719_R_1497.JPG	2017-07-19 13:17:17	58.5083	-136.0465	226	Random	0	0	1	0	Good	LFT	2017-09-14	SO-2017.1	0
SO_C_20170719_R_1498.JPG	2017-07-19 13:17:18	58.50830278	-136.0473444	226	Random	0	0	0	0	Good	LFT	2017-09-14	SO-2017.1	0
SO_C_20170719_R_1499.JPG	2017-07-19 13:17:19	58.50830556	-136.0481889	227	Random	0	0	0	0	Good	LFT	2017-09-14	SO-2017.1	0
SO_C_20170719_R_1500.JPG	2017-07-19 13:17:20	58.50830833	-136.0490333	226	Random	0	0	0	0	Good	LFT	2017-09-14	SO-2017.1	0
SO_C_20170719_R_1501.JPG	2017-07-19 13:17:21	58.50831111	-136.0498806	226	Random	0	0	0	0	Good	LFT	2017-09-14	SO-2017.1	0
SO_C_20170719_R_1502.JPG	2017-07-19 13:17:22	58.50831667	-136.0507306	225	Random	0	0	0	0	Good	LFT	2017-09-14	SO-2017.1	0
SO_C_20170719_R_1503.JPG	2017-07-19 13:17:23	58.50832222	-136.0515806	223	Random	0	0	0	0	Good	LFT	2017-09-14	SO-2017.1	0
SO_C_20170719_R_1504.JPG	2017-07-19 13:17:24	58.508325	-136.0524306	222	Random	0	0	1	0	Good	LFT	2017-09-14	SO-2017.1	0
SO_C_20170719_R_1505.JPG	2017-07-19 13:17:25	58.50832778	-136.0532806	221	Random	0	0	1	0	Good	LFT	2017-09-14	SO-2017.1	0
SO_C_20170719_R_1506.JPG	2017-07-19 13:17:26	58.50832778	-136.0541333	220	Random	0	0	0	0	Good	LFT	2017-09-14	SO-2017.1	0
SO_C_20170719_R_1507.JPG	2017-07-19 13:17:27	58.50832778	-136.0549806	220	Random	0	0	1	0	Good	LFT	2017-09-14	SO-2017.1	0
SO_C_20170719_R_1508.JPG	2017-07-19 13:17:28	58.50831944	-136.0558278	220	Random	0	0	0	0	Good	LFT	2017-09-14	SO-2017.1	0
SO_C_20170719_R_1509.JPG	2017-07-19 13:17:29	58.50830833	-136.0566694	220	Random	0	0	0	0	Good	LFT	2017-09-14	SO-2017.1	0
SO_C_20170719_R_1510.JPG	2017-07-19 13:17:30	58.50829722	-136.0575056	221	Random	0	0	0	0	Good	LFT	2017-09-14	SO-2017.1	0
SO_C_20170719_R_1511.JPG	2017-07-19 13:17:31	58.50828611	-136.0583389	222	Random	0	0	0	0	Good	LFT	2017-09-14	SO-2017.1	0
SO_C_20170719_R_1512.JPG	2017-07-19 13:17:32	58.508275	-136.0591667	222	Random	0	0	0	0	Good	LFT	2017-09-14	SO-2017.1	0
SO_C_20170719_R_1513.JPG	2017-07-19 13:17:33	58.50826667	-136.0599917	223	Random	0	0	0	0	Good	LFT	2017-09-14	SO-2017.1	0
SO_C_20170719_R_1514.JPG	2017-07-19 13:17:34	58.50825556	-136.0608139	223	Random	0	0	0	0	Good	LFT	2017-09-14	SO-2017.1	0
SO_C_20170719_R_1515.JPG	2017-07-19 13:17:35	58.50825	-136.0616333	223	Random	0	0	0	0	Good	LFT	2017-09-14	SO-2017.1	0
SO_C_20170719_R_1516.JPG	2017-07-19 13:17:36	58.50824167	-136.0624528	224	Random	0	0	0	0	Good	LFT	2017-09-14	SO-2017.1	0
SO_C_20170719_R_1517.JPG	2017-07-19 13:17:37	58.50823611	-136.0632694	223	Random	0	0	0	0	Good	LFT	2017-09-14	SO-2017.1	0
SO_C_20170719_R_1518.JPG	2017-07-19 13:17:38	58.50823056	-136.0640833	222	Random	0	0	0	0	Good	LFT	2017-09-14	SO-2017.1	0
SO_C_20170719_R_1519.JPG	2017-07-19 13:17:39	58.50822778	-136.0649028	222	Random	0	0	0	0	Good	LFT	2017-09-14	SO-2017.1	0
SO_C_20170719_R_1520.JPG	2017-07-19 13:17:40	58.508225	-136.0657194	221	Random	0	0	0	0	Good	LFT	2017-09-14	SO-2017.1	0
SO_C_20170719_R_1521.JPG	2017-07-19 13:17:41	58.50822222	-136.0665389	221	Random	0	0	0	0	Good	LFT	2017-09-14	SO-2017.1	0
SO_C_20170719_R_1522.JPG	2017-07-19 13:17:42	58.50821944	-136.0673611	220	Random	0	0	0	0	Good	LFT	2017-09-14	SO-2017.1	0
SO_C_20170719_R_1523.JPG	2017-07-19 13:17:43	58.50821111	-136.0681833	219	Random	0	0	0	0	Good	LFT	2017-09-14	SO-2017.1	0
SO_C_20170719_R_1524.JPG	2017-07-19 13:17:44	58.50820278	-136.0690083	217	Random	0	0	0	0	Good	LFT	2017-09-14	SO-2017.1	0
SO_C_20170719_R_1525.JPG	2017-07-19 13:17:45	58.50818611	-136.0698333	216	Random	0	0	0	0	Good	LFT	2017-09-14	SO-2017.1	0
SO_C_20170719_R_1526.JPG	2017-07-19 13:17:46	58.50816667	-136.0706556	215	Random	0	0	0	0	Good	LFT	2017-09-14	SO-2017.1	0
SO_C_20170719_R_1527.JPG	2017-07-19 13:17:47	58.50814444	-136.071475	216	Random	0	0	0	0	Good	LFT	2017-09-14	SO-2017.1	0
SO_C_20170719_R_1528.JPG	2017-07-19 13:17:48	58.50812222	-136.0722889	216	Random	0	0	0	0	Good	LFT	2017-09-14	SO-2017.1	0
SO_C_20170719_R_1529.JPG	2017-07-19 13:17:49	58.5081	-136.0731	216	Random	0	0	1	0	Good	LFT	2017-09-14	SO-2017.1	0
SO_C_20170719_R_1530.JPG	2017-07-19 13:17:50	58.50807778	-136.0739056	218	Random	0	0	0	0	Good	LFT	2017-09-14	SO-2017.1	0
SO_C_20170719_R_1531.JPG	2017-07-19 13:17:51	58.50805556	-136.0747083	219	Random	0	0	0	0	Good	LFT	2017-09-14	SO-2017.1	0
SO_C_20170719_R_1532.JPG	2017-07-19 13:17:52	58.50803333	-136.0755056	219	Random	0	0	0	0	Good	LFT	2017-09-14	SO-2017.1	0
SO_C_20170719_R_1533.JPG	2017-07-19 13:17:53	58.50801389	-136.0763028	220	Random	0	0	0	0	Good	LFT	2017-09-14	SO-2017.1	0
SO_C_20170719_R_1534.JPG	2017-07-19 13:17:54	58.50799722	-136.0770972	220	Random	0	0	0	0	Good	LFT	2017-09-14	SO-2017.1	0
SO_C_20170719_R_1535.JPG	2017-07-19 13:17:55	58.50798611	-136.0778944	220	Random	0	0	0	0	Good	LFT	2017-09-14	SO-2017.1	0
SO_C_20170719_R_1536.JPG	2017-07-19 13:17:56	58.50797778	-136.0786944	219	Random	0	0	0	0	Good	LFT	2017-09-14	SO-2017.1	0
SO_C_20170719_R_1537.JPG	2017-07-19 13:17:57	58.50797222	-136.0794972	218	Random	0	0	0	0	Good	LFT	2017-09-14	SO-2017.1	0
SO_C_20170719_R_1538.JPG	2017-07-19 13:17:58	58.50796944	-136.0803056	217	Random	3	0	0	0	Good	LFT	2017-09-26	SO-2017.1	0
SO_C_20170719_R_1539.JPG	2017-07-19 13:17:59	58.50796667	-136.0811194	216	Random	0	0	0	0	Good	LFT	2017-09-14	SO-2017.1	0
SO_C_20170719_R_1540.JPG	2017-07-19 13:18:00	58.50796667	-136.0819361	215	Random	0	0	0	0	Good	LFT	2017-09-14	SO-2017.1	0
SO_C_20170719_R_1541.JPG	2017-07-19 13:18:01	58.50796667	-136.0827556	215	Random	0	0	0	0	Good	LFT	2017-09-14	SO-2017.1	0
SO_C_20170719_R_1542.JPG	2017-07-19 13:18:02	58.50796667	-136.0835778	214	Random	0	0	0	0	Good	LFT	2017-09-14	SO-2017.1	0
SO_C_20170719_R_1543.JPG	2017-07-19 13:18:03	58.50797222	-136.0844	214	Random	0	0	0	0	Good	LFT	2017-09-14	SO-2017.1	0
SO_C_20170719_R_1544.JPG	2017-07-19 13:18:04	58.507975	-136.0852194	212	Random	0	0	0	0	Good	LFT	2017-09-14	SO-2017.1	0
SO_C_20170719_R_1545.JPG	2017-07-19 13:18:05	58.507975	-136.0860361	212	Random	0	0	0	0	Good	LFT	2017-09-14	SO-2017.1	0
SO_C_20170719_R_1546.JPG	2017-07-19 13:18:06	58.50797778	-136.0868556	213	Random	0	0	0	0	Good	LFT	2017-09-14	SO-2017.1	0
SO_C_20170719_R_1547.JPG	2017-07-19 13:18:07	58.50798056	-136.087675	212	Random	0	0	0	0	Good	LFT	2017-09-14	SO-2017.1	0
SO_C_20170719_R_1548.JPG	2017-07-19 13:18:08	58.50798333	-136.0884944	212	Random	0	0	0	0	Good	LFT	2017-09-14	SO-2017.1	0
SO_C_20170719_R_1549.JPG	2017-07-19 13:18:09	58.50798611	-136.0893139	212	Random	0	0	0	0	Good	LFT	2017-09-14	SO-2017.1	0
SO_C_20170719_R_1550.JPG	2017-07-19 13:18:10	58.50798889	-136.0901361	212	Random	0	0	0	0	Good	LFT	2017-09-14	SO-2017.1	0
SO_C_20170719_R_1551.JPG	2017-07-19 13:18:11	58.50798889	-136.0909583	212	Random	0	0	0	0	Good	LFT	2017-09-14	SO-2017.1	0
SO_C_20170719_R_1552.JPG	2017-07-19 13:18:12	58.50798889	-136.0917861	212	Random	0	0	0	0	Good	LFT	2017-09-14	SO-2017.1	0
SO_C_20170719_R_1553.JPG	2017-07-19 13:18:13	58.50798889	-136.0926111	213	Random	0	0	0	0	Good	LFT	2017-09-14	SO-2017.1	0
SO_C_20170719_R_1554.JPG	2017-07-19 13:18:14	58.50798889	-136.0934417	213	Random	0	0	1	0	Good	LFT	2017-09-14	SO-2017.1	0
SO_C_20170719_R_1555.JPG	2017-07-19 13:18:15	58.50798889	-136.0942722	213	Random	0	0	1	1	Good	LFT	2017-09-14	SO-2017.1	0
SO_C_20170719_R_1556.JPG	2017-07-19 13:18:16	58.50798611	-136.0951028	213	Random	0	0	1	1	Good	LFT	2017-09-14	SO-2017.1	0
SO_C_20170719_R_1557.JPG	2017-07-19 13:18:17	58.50798056	-136.0959333	213	Random	0	0	0	1	Good	LFT	2017-09-14	SO-2017.1	0
SO_C_20170719_R_1558.JPG	2017-07-19 13:18:18	58.50797222	-136.0967611	213	Random	0	0	0	1	Good	LFT	2017-09-14	SO-2017.1	0
SO_C_20170719_R_1559.JPG	2017-07-19 13:22:31	58.518425	-136.2482167	206	Random	0	0	0	1	Good	LFT	2017-09-14	SO-2017.1	0
SO_C_20170719_R_1560.JPG	2017-07-19 13:22:32	58.51843056	-136.2474139	206	Random	0	0	0	1	Good	LFT	2017-09-14	SO-2017.1	0
SO_C_20170719_R_1561.JPG	2017-07-19 13:22:33	58.51842222	-136.2466111	206	Random	0	0	0	1	Good	LFT	2017-09-14	SO-2017.1	0
SO_C_20170719_R_1562.JPG	2017-07-19 13:22:34	58.51839722	-136.2458056	206	Random	0	0	0	1	Good	LFT	2017-09-14	SO-2017.1	0
SO_C_20170719_R_1563.JPG	2017-07-19 13:22:35	58.51836111	-136.2449972	206	Random	0	0	0	1	Good	LFT	2017-09-14	SO-2017.1	0
SO_C_20170719_R_1564.JPG	2017-07-19 13:22:36	58.51830833	-136.2441861	206	Random	0	0	0	1	Good	LFT	2017-09-14	SO-2017.1	0
SO_C_20170719_R_1565.JPG	2017-07-19 13:22:37	58.51824722	-136.2433806	206	Random	0	0	0	1	Good	LFT	2017-09-14	SO-2017.1	0
SO_C_20170719_R_1566.JPG	2017-07-19 13:22:38	58.518175	-136.2425722	207	Random	0	0	0	1	Good	LFT	2017-09-14	SO-2017.1	0
SO_C_20170719_R_1567.JPG	2017-07-19 13:22:39	58.51809722	-136.2417667	207	Random	0	0	0	1	Good	LFT	2017-09-14	SO-2017.1	0
SO_C_20170719_R_1568.JPG	2017-07-19 13:22:40	58.51801667	-136.2409583	207	Random	0	0	0	1	Good	LFT	2017-09-14	SO-2017.1	0
SO_C_20170719_R_1569.JPG	2017-07-19 13:22:41	58.51793333	-136.2401444	208	Random	0	0	0	1	Good	LFT	2017-09-14	SO-2017.1	0
SO_C_20170719_R_1570.JPG	2017-07-19 13:22:42	58.51785833	-136.2393278	210	Random	0	0	0	1	Good	LFT	2017-09-14	SO-2017.1	0
SO_C_20170719_R_1571.JPG	2017-07-19 13:22:43	58.51778889	-136.2385056	209	Random	0	0	0	1	Good	LFT	2017-09-14	SO-2017.1	0
SO_C_20170719_R_1572.JPG	2017-07-19 13:22:44	58.517725	-136.2376806	210	Random	0	0	0	1	Good	LFT	2017-09-14	SO-2017.1	0
SO_C_20170719_R_1573.JPG	2017-07-19 13:22:45	58.51765833	-136.23685	212	Random	0	0	0	1	Good	LFT	2017-09-14	SO-2017.1	0
SO_C_20170719_R_1574.JPG	2017-07-19 13:22:46	58.51759444	-136.2360194	214	Random	0	0	0	1	Good	LFT	2017-09-14	SO-2017.1	0
SO_C_20170719_R_1575.JPG	2017-07-19 13:22:47	58.51753611	-136.2351833	215	Random	0	0	0	1	Good	LFT	2017-09-14	SO-2017.1	0
SO_C_20170719_R_1576.JPG	2017-07-19 13:22:48	58.51747778	-136.2343417	218	Random	0	0	0	1	Good	LFT	2017-09-14	SO-2017.1	0
SO_C_20170719_R_1577.JPG	2017-07-19 13:22:49	58.51741944	-136.2335	220	Random	0	0	0	1	Good	LFT	2017-09-14	SO-2017.1	0
SO_C_20170719_R_1578.JPG	2017-07-19 13:22:50	58.51736111	-136.2326528	222	Random	0	0	0	1	Good	LFT	2017-09-14	SO-2017.1	0
SO_C_20170719_R_1579.JPG	2017-07-19 13:22:51	58.51730278	-136.2318083	226	Random	0	0	1	1	Good	LFT	2017-09-14	SO-2017.1	0
SO_C_20170719_R_1580.JPG	2017-07-19 13:22:52	58.51725278	-136.2309639	229	Random	0	0	0	0	Good	LFT	2017-09-14	SO-2017.1	0
SO_C_20170719_R_1581.JPG	2017-07-19 13:22:53	58.51721111	-136.2301139	231	Random	0	0	0	0	Good	LFT	2017-09-14	SO-2017.1	0
SO_C_20170719_R_1582.JPG	2017-07-19 13:22:54	58.517175	-136.2292611	232	Random	0	0	1	0	Good	LFT	2017-09-14	SO-2017.1	0
SO_C_20170719_R_1583.JPG	2017-07-19 13:22:55	58.51715278	-136.2284056	232	Random	0	0	1	0	Good	LFT	2017-09-14	SO-2017.1	0
SO_C_20170719_R_1584.JPG	2017-07-19 13:22:56	58.51713889	-136.2275444	232	Random	0	0	0	0	Good	LFT	2017-09-14	SO-2017.1	0
SO_C_20170719_R_1585.JPG	2017-07-19 13:22:57	58.51713611	-136.2266806	230	Random	0	0	0	0	Good	LFT	2017-09-14	SO-2017.1	0
SO_C_20170719_R_1586.JPG	2017-07-19 13:22:58	58.51713889	-136.2258083	230	Random	0	0	0	0	Good	LFT	2017-09-14	SO-2017.1	0
SO_C_20170719_R_1587.JPG	2017-07-19 13:22:59	58.51715	-136.2249333	229	Random	0	0	0	0	Good	LFT	2017-09-14	SO-2017.1	0
SO_C_20170719_R_1588.JPG	2017-07-19 13:23:00	58.51716667	-136.2240556	229	Random	0	0	0	0	Good	LFT	2017-09-14	SO-2017.1	0
SO_C_20170719_R_1589.JPG	2017-07-19 13:23:01	58.51718611	-136.2231722	227	Random	0	0	0	0	Good	LFT	2017-09-14	SO-2017.1	0
SO_C_20170719_R_1590.JPG	2017-07-19 13:23:02	58.51721111	-136.2222917	227	Random	0	0	0	0	Good	LFT	2017-09-14	SO-2017.1	0
SO_C_20170719_R_1591.JPG	2017-07-19 13:23:03	58.51724444	-136.2214083	227	Random	0	0	0	0	Good	LFT	2017-09-14	SO-2017.1	0
SO_C_20170719_R_1592.JPG	2017-07-19 13:23:04	58.51728056	-136.2205306	227	Random	0	0	0	0	Good	LFT	2017-09-14	SO-2017.1	0
SO_C_20170719_R_1593.JPG	2017-07-19 13:23:05	58.517325	-136.21965	227	Random	0	0	0	0	Good	LFT	2017-09-14	SO-2017.1	0
SO_C_20170719_R_1594.JPG	2017-07-19 13:23:06	58.51737222	-136.218775	229	Random	0	0	0	0	Good	LFT	2017-09-14	SO-2017.1	0
SO_C_20170719_R_1595.JPG	2017-07-19 13:23:07	58.51742222	-136.2179028	229	Random	0	0	0	1	Good	LFT	2017-09-14	SO-2017.1	0
SO_C_20170719_R_1596.JPG	2017-07-19 13:23:08	58.51747222	-136.2170333	230	Random	0	0	0	1	Good	LFT	2017-09-14	SO-2017.1	0
SO_C_20170719_R_1597.JPG	2017-07-19 13:23:09	58.51751944	-136.2161639	231	Random	0	0	0	1	Good	LFT	2017-09-14	SO-2017.1	0
SO_C_20170719_R_1598.JPG	2017-07-19 13:23:10	58.51756667	-136.2152972	231	Random	0	0	0	1	Good	LFT	2017-09-14	SO-2017.1	0
SO_C_20170719_R_1599.JPG	2017-07-19 13:23:11	58.51761111	-136.2144306	230	Random	0	0	0	1	Good	LFT	2017-09-14	SO-2017.1	0
SO_C_20170719_R_1600.JPG	2017-07-19 13:23:12	58.51765	-136.2135611	229	Random	0	0	0	1	Good	LFT	2017-09-14	SO-2017.1	0
SO_C_20170719_R_1601.JPG	2017-07-19 13:23:13	58.51768889	-136.2126917	229	Random	0	0	0	0	Good	LFT	2017-09-14	SO-2017.1	0
SO_C_20170719_R_1602.JPG	2017-07-19 13:23:14	58.51772778	-136.211825	227	Random	0	0	0	0	Good	LFT	2017-09-14	SO-2017.1	0
SO_C_20170719_R_1603.JPG	2017-07-19 13:23:15	58.51776944	-136.2109556	225	Random	0	0	0	0	Good	LFT	2017-09-14	SO-2017.1	0
SO_C_20170719_R_1604.JPG	2017-07-19 13:23:16	58.51780833	-136.2100861	224	Random	0	0	0	0	Good	LFT	2017-09-14	SO-2017.1	0
SO_C_20170719_R_1605.JPG	2017-07-19 13:23:17	58.51784444	-136.2092167	223	Random	0	0	0	0	Good	LFT	2017-09-14	SO-2017.1	0
SO_C_20170719_R_1606.JPG	2017-07-19 13:23:18	58.51788056	-136.2083528	222	Random	0	0	0	0	Good	LFT	2017-09-14	SO-2017.1	0
SO_C_20170719_R_1607.JPG	2017-07-19 13:23:19	58.51791667	-136.2074917	221	Random	0	0	0	0	Good	LFT	2017-09-14	SO-2017.1	0
SO_C_20170719_R_1608.JPG	2017-07-19 13:23:20	58.51795	-136.2066361	222	Random	0	0	0	0	Good	LFT	2017-09-14	SO-2017.1	0
SO_C_20170719_R_1609.JPG	2017-07-19 13:23:21	58.51797778	-136.2057889	224	Random	0	0	0	0	Good	LFT	2017-09-14	SO-2017.1	0
SO_C_20170719_R_1610.JPG	2017-07-19 13:23:22	58.51800278	-136.20495	225	Random	0	0	0	0	Good	LFT	2017-09-14	SO-2017.1	0
SO_C_20170719_R_1611.JPG	2017-07-19 13:23:23	58.51802778	-136.2041139	227	Random	0	0	0	0	Good	LFT	2017-09-14	SO-2017.1	0
SO_C_20170719_R_1612.JPG	2017-07-19 13:23:24	58.51805	-136.2032833	227	Random	0	0	0	0	Good	LFT	2017-09-14	SO-2017.1	0
SO_C_20170719_R_1613.JPG	2017-07-19 13:23:25	58.51806944	-136.2024556	228	Random	0	0	0	0	Good	LFT	2017-09-14	SO-2017.1	0
SO_C_20170719_R_1614.JPG	2017-07-19 13:23:26	58.51808333	-136.201625	228	Random	0	0	0	0	Good	LFT	2017-09-14	SO-2017.1	0
SO_C_20170719_R_1615.JPG	2017-07-19 13:23:27	58.51809444	-136.2007917	227	Random	0	0	0	0	Good	LFT	2017-09-14	SO-2017.1	0
SO_C_20170719_R_1616.JPG	2017-07-19 13:23:28	58.51810556	-136.1999556	226	Random	0	0	0	0	Good	LFT	2017-09-14	SO-2017.1	0
SO_C_20170719_R_1617.JPG	2017-07-19 13:23:29	58.51811389	-136.1991139	225	Random	0	0	0	0	Good	LFT	2017-09-14	SO-2017.1	0
SO_C_20170719_R_1618.JPG	2017-07-19 13:23:30	58.51811667	-136.1982667	224	Random	0	0	0	0	Good	LFT	2017-09-14	SO-2017.1	0
SO_C_20170719_R_1619.JPG	2017-07-19 13:23:31	58.51811389	-136.1974167	223	Random	0	0	1	0	Good	LFT	2017-09-14	SO-2017.1	0
SO_C_20170719_R_1620.JPG	2017-07-19 13:23:32	58.51810556	-136.1965611	220	Random	0	0	0	0	Good	LFT	2017-09-14	SO-2017.1	0
SO_C_20170719_R_1621.JPG	2017-07-19 13:23:33	58.5181	-136.1957056	219	Random	0	0	0	0	Good	LFT	2017-09-14	SO-2017.1	0
SO_C_20170719_R_1622.JPG	2017-07-19 13:23:34	58.51809167	-136.1948472	218	Random	0	0	0	0	Good	LFT	2017-09-14	SO-2017.1	0
SO_C_20170719_R_1623.JPG	2017-07-19 13:23:35	58.51808889	-136.1939833	216	Random	0	0	0	0	Good	LFT	2017-09-14	SO-2017.1	0
SO_C_20170719_R_1624.JPG	2017-07-19 13:23:36	58.51808056	-136.1931167	214	Random	0	0	1	0	Good	LFT	2017-09-14	SO-2017.1	0
SO_C_20170719_R_1625.JPG	2017-07-19 13:23:37	58.51807222	-136.1922528	213	Random	0	0	0	0	Good	LFT	2017-09-14	SO-2017.1	0
SO_C_20170719_R_1626.JPG	2017-07-19 13:23:38	58.51806111	-136.1913889	212	Random	0	0	1	0	Good	LFT	2017-09-14	SO-2017.1	0
SO_C_20170719_R_1627.JPG	2017-07-19 13:23:39	58.51804722	-136.1905278	212	Random	0	0	1	0	Good	LFT	2017-09-14	SO-2017.1	0
SO_C_20170719_R_1628.JPG	2017-07-19 13:23:40	58.51802778	-136.1896694	211	Random	0	0	1	0	Good	LFT	2017-09-14	SO-2017.1	0
SO_C_20170719_R_1629.JPG	2017-07-19 13:23:41	58.51800556	-136.1888194	212	Random	0	0	1	1	Good	LFT	2017-09-14	SO-2017.1	0
SO_C_20170719_R_1630.JPG	2017-07-19 13:23:42	58.51798333	-136.1879722	212	Random	0	0	0	1	Good	LFT	2017-09-14	SO-2017.1	0
SO_C_20170719_R_1631.JPG	2017-07-19 13:23:43	58.51796111	-136.1871278	213	Random	0	0	1	1	Good	LFT	2017-09-14	SO-2017.1	0
SO_C_20170719_R_1632.JPG	2017-07-19 13:23:44	58.51794167	-136.1862861	213	Random	0	0	0	1	Good	LFT	2017-09-14	SO-2017.1	0
SO_C_20170719_R_1633.JPG	2017-07-19 13:23:45	58.51791944	-136.1854472	214	Random	0	0	1	1	Good	LFT	2017-09-14	SO-2017.1	0
SO_C_20170719_R_1634.JPG	2017-07-19 13:23:46	58.5179	-136.1846111	215	Random	1	0	1	1	Good	LFT	2017-09-26	SO-2017.1	0
SO_C_20170719_R_1635.JPG	2017-07-19 13:23:47	58.51788333	-136.1837722	215	Random	0	0	1	1	Good	LFT	2017-09-14	SO-2017.1	0
SO_C_20170719_R_1636.JPG	2017-07-19 13:23:48	58.51786667	-136.1829333	215	Random	0	0	1	0	Good	LFT	2017-09-14	SO-2017.1	0
SO_C_20170719_R_1637.JPG	2017-07-19 13:23:49	58.51785833	-136.1820944	215	Random	0	0	1	0	Good	LFT	2017-09-14	SO-2017.1	0
SO_C_20170719_R_1638.JPG	2017-07-19 13:23:50	58.51785556	-136.1812528	215	Random	0	0	1	0	Good	LFT	2017-09-14	SO-2017.1	0
SO_C_20170719_R_1639.JPG	2017-07-19 13:23:51	58.51786111	-136.1804083	216	Random	0	0	1	0	Good	LFT	2017-09-14	SO-2017.1	0
SO_C_20170719_R_1640.JPG	2017-07-19 13:23:52	58.51786944	-136.1795639	216	Random	0	0	0	0	Good	LFT	2017-09-14	SO-2017.1	0
SO_C_20170719_R_1641.JPG	2017-07-19 13:23:53	58.51788056	-136.1787139	216	Random	0	0	1	0	Good	LFT	2017-09-14	SO-2017.1	0
SO_C_20170719_R_1642.JPG	2017-07-19 13:23:54	58.51789444	-136.1778639	215	Random	0	0	0	0	Good	LFT	2017-09-14	SO-2017.1	0
SO_C_20170719_R_1643.JPG	2017-07-19 13:23:55	58.51790556	-136.1770111	214	Random	0	0	0	0	Good	LFT	2017-09-14	SO-2017.1	0
SO_C_20170719_R_1644.JPG	2017-07-19 13:23:56	58.51791944	-136.1761583	214	Random	0	0	0	0	Good	LFT	2017-09-14	SO-2017.1	0
SO_C_20170719_R_1645.JPG	2017-07-19 13:23:57	58.51793056	-136.1753028	214	Random	0	0	0	0	Good	LFT	2017-09-14	SO-2017.1	0
SO_C_20170719_R_1646.JPG	2017-07-19 13:23:58	58.51794167	-136.1744472	214	Random	0	0	0	0	Good	LFT	2017-09-14	SO-2017.1	0
SO_C_20170719_R_1647.JPG	2017-07-19 13:23:59	58.51795278	-136.1735972	215	Random	0	0	1	0	Good	LFT	2017-09-14	SO-2017.1	0
SO_C_20170719_R_1648.JPG	2017-07-19 13:24:00	58.51796389	-136.17275	216	Random	0	0	0	0	Good	LFT	2017-09-14	SO-2017.1	0
SO_C_20170719_R_1649.JPG	2017-07-19 13:24:01	58.517975	-136.1719083	217	Random	0	0	0	0	Good	LFT	2017-09-14	SO-2017.1	0
SO_C_20170719_R_1650.JPG	2017-07-19 13:24:02	58.51798333	-136.1710722	218	Random	0	0	0	0	Good	LFT	2017-09-14	SO-2017.1	0
SO_C_20170719_R_1651.JPG	2017-07-19 13:24:03	58.51799444	-136.1702417	220	Random	0	0	1	0	Good	LFT	2017-09-14	SO-2017.1	0
SO_C_20170719_R_1652.JPG	2017-07-19 13:24:04	58.51800556	-136.1694111	221	Random	0	0	1	0	Good	LFT	2017-09-14	SO-2017.1	0
SO_C_20170719_R_1653.JPG	2017-07-19 13:24:05	58.51801667	-136.1685833	222	Random	0	0	0	0	Good	LFT	2017-09-14	SO-2017.1	0
SO_C_20170719_R_1654.JPG	2017-07-19 13:24:06	58.518025	-136.16775	222	Random	0	0	1	0	Good	LFT	2017-09-14	SO-2017.1	0
SO_C_20170719_R_1655.JPG	2017-07-19 13:24:07	58.51803611	-136.1669167	221	Random	0	0	0	0	Good	LFT	2017-09-14	SO-2017.1	0
SO_C_20170719_R_1656.JPG	2017-07-19 13:24:08	58.51804722	-136.1660778	220	Random	0	0	0	0	Good	LFT	2017-09-14	SO-2017.1	0
SO_C_20170719_R_1657.JPG	2017-07-19 13:24:09	58.51806389	-136.1652333	219	Random	0	0	0	0	Good	LFT	2017-09-14	SO-2017.1	0
SO_C_20170719_R_1658.JPG	2017-07-19 13:24:10	58.51808056	-136.1643861	218	Random	0	0	0	0	Good	LFT	2017-09-14	SO-2017.1	0
SO_C_20170719_R_1659.JPG	2017-07-19 13:24:11	58.51809722	-136.1635389	217	Random	0	0	0	0	Good	LFT	2017-09-14	SO-2017.1	0
SO_C_20170719_R_1660.JPG	2017-07-19 13:24:12	58.51811667	-136.1626917	218	Random	0	0	1	0	Good	LFT	2017-09-14	SO-2017.1	0
SO_C_20170719_R_1661.JPG	2017-07-19 13:24:13	58.51813889	-136.1618444	218	Random	0	0	1	0	Good	LFT	2017-09-14	SO-2017.1	0
SO_C_20170719_R_1662.JPG	2017-07-19 13:24:14	58.51816111	-136.161	219	Random	0	0	0	0	Good	LFT	2017-09-14	SO-2017.1	0
SO_C_20170719_R_1663.JPG	2017-07-19 13:24:15	58.51818611	-136.1601611	221	Random	0	0	0	0	Good	LFT	2017-09-14	SO-2017.1	0
SO_C_20170719_R_1664.JPG	2017-07-19 13:24:16	58.51821111	-136.1593278	222	Random	0	0	1	0	Good	LFT	2017-09-14	SO-2017.1	0
SO_C_20170719_R_1665.JPG	2017-07-19 13:24:17	58.51823889	-136.1584972	223	Random	0	0	1	0	Good	LFT	2017-09-14	SO-2017.1	0
SO_C_20170719_R_1666.JPG	2017-07-19 13:24:18	58.51826667	-136.1576667	225	Random	0	0	0	0	Good	LFT	2017-09-14	SO-2017.1	0
SO_C_20170719_R_1667.JPG	2017-07-19 13:24:19	58.51829167	-136.1568389	224	Random	0	0	0	0	Good	LFT	2017-09-14	SO-2017.1	0
SO_C_20170719_R_1668.JPG	2017-07-19 13:24:20	58.51831667	-136.1560083	224	Random	0	0	1	0	Good	LFT	2017-09-14	SO-2017.1	0
SO_C_20170719_R_1669.JPG	2017-07-19 13:24:21	58.51833889	-136.155175	222	Random	0	0	0	0	Good	LFT	2017-09-14	SO-2017.1	0
SO_C_20170719_R_1670.JPG	2017-07-19 13:24:22	58.51836111	-136.1543333	220	Random	0	0	0	0	Good	LFT	2017-09-14	SO-2017.1	0
SO_C_20170719_R_1671.JPG	2017-07-19 13:24:23	58.51838333	-136.1534889	219	Random	0	0	0	0	Good	LFT	2017-09-14	SO-2017.1	0
SO_C_20170719_R_1672.JPG	2017-07-19 13:24:24	58.51840278	-136.1526389	217	Random	0	0	1	0	Good	LFT	2017-09-14	SO-2017.1	0
SO_C_20170719_R_1673.JPG	2017-07-19 13:24:25	58.51841667	-136.1517833	216	Random	0	0	1	0	Good	LFT	2017-09-14	SO-2017.1	0
SO_C_20170719_R_1674.JPG	2017-07-19 13:24:26	58.51842778	-136.1509306	216	Random	0	0	0	1	Good	LFT	2017-09-14	SO-2017.1	0
SO_C_20170719_R_1675.JPG	2017-07-19 13:24:27	58.51843889	-136.1500778	216	Random	0	0	0	1	Good	LFT	2017-09-14	SO-2017.1	0
SO_C_20170719_R_1676.JPG	2017-07-19 13:24:28	58.51844444	-136.149225	216	Random	0	0	0	1	Good	LFT	2017-09-14	SO-2017.1	0
SO_C_20170719_R_1677.JPG	2017-07-19 13:24:29	58.51844444	-136.148375	217	Random	0	0	0	1	Good	LFT	2017-09-14	SO-2017.1	0
SO_C_20170719_R_1678.JPG	2017-07-19 13:24:30	58.51843611	-136.147525	217	Random	0	0	0	1	Good	LFT	2017-09-14	SO-2017.1	0
SO_C_20170719_R_1679.JPG	2017-07-19 13:24:31	58.518425	-136.1466806	218	Random	0	0	0	1	Good	LFT	2017-09-14	SO-2017.1	0
SO_C_20170719_R_1680.JPG	2017-07-19 13:24:32	58.51840833	-136.1458361	219	Random	0	0	0	1	Good	LFT	2017-09-14	SO-2017.1	0
SO_C_20170719_R_1681.JPG	2017-07-19 13:24:33	58.51839444	-136.1449944	219	Random	0	0	0	1	Good	LFT	2017-09-14	SO-2017.1	0
SO_C_20170719_R_1682.JPG	2017-07-19 13:24:34	58.51837778	-136.1441528	220	Random	0	0	0	1	Good	LFT	2017-09-14	SO-2017.1	0
SO_C_20170719_R_1683.JPG	2017-07-19 13:24:35	58.51836389	-136.1433139	221	Random	0	0	0	1	Good	LFT	2017-09-14	SO-2017.1	0
SO_C_20170719_R_1684.JPG	2017-07-19 13:24:36	58.51834722	-136.142475	222	Random	0	0	0	1	Good	LFT	2017-09-14	SO-2017.1	0
SO_C_20170719_R_1685.JPG	2017-07-19 13:24:37	58.51833056	-136.1416361	222	Random	0	0	0	1	Good	LFT	2017-09-14	SO-2017.1	0
SO_C_20170719_R_1686.JPG	2017-07-19 13:24:38	58.51831111	-136.1408	222	Random	0	0	0	1	Good	LFT	2017-09-14	SO-2017.1	0
SO_C_20170719_R_1687.JPG	2017-07-19 13:24:39	58.51829167	-136.1399583	222	Random	0	0	0	1	Good	LFT	2017-09-14	SO-2017.1	0
SO_C_20170719_R_1688.JPG	2017-07-19 13:24:40	58.51826944	-136.1391167	222	Random	0	0	0	1	Good	LFT	2017-09-14	SO-2017.1	0
SO_C_20170719_R_1689.JPG	2017-07-19 13:24:41	58.51824444	-136.138275	222	Random	0	0	0	1	Good	LFT	2017-09-14	SO-2017.1	0
SO_C_20170719_R_1690.JPG	2017-07-19 13:24:42	58.51821667	-136.1374306	222	Random	0	0	0	1	Good	LFT	2017-09-14	SO-2017.1	0
SO_C_20170719_R_1691.JPG	2017-07-19 13:24:43	58.51818611	-136.1365833	222	Random	0	0	0	1	Good	LFT	2017-09-14	SO-2017.1	0
SO_C_20170719_R_1692.JPG	2017-07-19 13:24:44	58.51815	-136.1357361	222	Random	0	0	1	1	Good	LFT	2017-09-14	SO-2017.1	0
SO_C_20170719_R_1693.JPG	2017-07-19 13:24:45	58.51811389	-136.1348889	221	Random	0	0	1	1	Good	LFT	2017-09-14	SO-2017.1	0
SO_C_20170719_R_1694.JPG	2017-07-19 13:24:46	58.518075	-136.1340444	221	Random	0	0	1	0	Good	LFT	2017-09-14	SO-2017.1	0
SO_C_20170719_R_1695.JPG	2017-07-19 13:24:47	58.51804167	-136.1331972	222	Random	0	0	1	0	Good	LFT	2017-09-14	SO-2017.1	0
SO_C_20170719_R_1696.JPG	2017-07-19 13:24:48	58.51800833	-136.1323528	222	Random	0	0	1	0	Good	LFT	2017-09-14	SO-2017.1	0
SO_C_20170719_R_1697.JPG	2017-07-19 13:24:49	58.51797778	-136.1315083	222	Random	0	0	1	0	Good	LFT	2017-09-14	SO-2017.1	0
SO_C_20170719_R_1698.JPG	2017-07-19 13:24:50	58.51795	-136.1306639	222	Random	0	0	1	0	Good	LFT	2017-09-14	SO-2017.1	0
SO_C_20170719_R_1699.JPG	2017-07-19 13:24:51	58.517925	-136.1298194	223	Random	0	0	1	0	Good	LFT	2017-09-14	SO-2017.1	0
SO_C_20170719_R_1700.JPG	2017-07-19 13:24:52	58.51790556	-136.1289778	223	Random	0	0	1	0	Good	LFT	2017-09-14	SO-2017.1	0
SO_C_20170719_R_1701.JPG	2017-07-19 13:24:53	58.51788889	-136.1281333	223	Random	0	0	1	0	Good	LFT	2017-09-14	SO-2017.1	0
SO_C_20170719_R_1702.JPG	2017-07-19 13:24:54	58.51788333	-136.1272889	224	Random	0	0	1	0	Good	LFT	2017-09-14	SO-2017.1	0
SO_C_20170719_R_1703.JPG	2017-07-19 13:24:55	58.51788333	-136.1264472	225	Random	0	0	1	0	Good	LFT	2017-09-14	SO-2017.1	0
SO_C_20170719_R_1704.JPG	2017-07-19 13:24:56	58.51789444	-136.1256028	225	Random	0	0	1	1	Good	LFT	2017-09-14	SO-2017.1	0
SO_C_20170719_R_1705.JPG	2017-07-19 13:24:57	58.51791389	-136.1247583	224	Random	0	0	0	1	Good	LFT	2017-09-14	SO-2017.1	0
SO_C_20170719_R_1706.JPG	2017-07-19 13:24:58	58.51793889	-136.1239139	225	Random	0	0	0	1	Good	LFT	2017-09-14	SO-2017.1	0
SO_C_20170719_R_1707.JPG	2017-07-19 13:24:59	58.51796667	-136.1230722	225	Random	0	0	0	1	Good	LFT	2017-09-14	SO-2017.1	0
SO_C_20170719_R_1708.JPG	2017-07-19 13:25:00	58.51799444	-136.1222278	226	Random	0	0	0	1	Good	LFT	2017-09-14	SO-2017.1	0
SO_C_20170719_R_1709.JPG	2017-07-19 13:25:01	58.518025	-136.1213833	226	Random	0	0	1	1	Good	LFT	2017-09-14	SO-2017.1	0
SO_C_20170719_R_1710.JPG	2017-07-19 13:25:02	58.51805833	-136.1205417	227	Random	1	0	1	1	Good	LFT	2017-09-26	SO-2017.1	0
SO_C_20170719_R_1711.JPG	2017-07-19 13:25:03	58.51809444	-136.1196972	226	Random	0	0	1	0	Good	LFT	2017-09-14	SO-2017.1	0
SO_C_20170719_R_1712.JPG	2017-07-19 13:25:04	58.51813333	-136.1188556	226	Random	0	0	1	0	Good	LFT	2017-09-14	SO-2017.1	0
SO_C_20170719_R_1713.JPG	2017-07-19 13:25:05	58.518175	-136.1180111	227	Random	0	0	0	0	Good	LFT	2017-09-14	SO-2017.1	0
SO_C_20170719_R_1714.JPG	2017-07-19 13:25:06	58.51821667	-136.1171667	226	Random	0	0	0	0	Good	LFT	2017-09-14	SO-2017.1	0
SO_C_20170719_R_1715.JPG	2017-07-19 13:25:07	58.51825833	-136.1163194	226	Random	0	0	0	0	Good	LFT	2017-09-14	SO-2017.1	0
SO_C_20170719_R_1716.JPG	2017-07-19 13:25:08	58.51829722	-136.1154722	226	Random	0	0	0	0	Good	LFT	2017-09-14	SO-2017.1	0
SO_C_20170719_R_1717.JPG	2017-07-19 13:25:09	58.51833333	-136.1146222	226	Random	0	0	1	0	Good	LFT	2017-09-14	SO-2017.1	0
SO_C_20170719_R_1718.JPG	2017-07-19 13:25:10	58.51836389	-136.1137722	225	Random	0	0	0	0	Good	LFT	2017-09-14	SO-2017.1	0
SO_C_20170719_R_1719.JPG	2017-07-19 13:25:11	58.51838889	-136.1129222	225	Random	0	0	0	0	Good	LFT	2017-09-14	SO-2017.1	0
SO_C_20170719_R_1720.JPG	2017-07-19 13:25:12	58.51840556	-136.1120694	225	Random	0	0	0	0	Good	LFT	2017-09-14	SO-2017.1	0
SO_C_20170719_R_1721.JPG	2017-07-19 13:25:13	58.51841944	-136.1112194	224	Random	0	0	1	0	Good	LFT	2017-09-14	SO-2017.1	0
SO_C_20170719_R_1722.JPG	2017-07-19 13:25:14	58.51842778	-136.1103694	225	Random	0	0	1	0	Good	LFT	2017-09-14	SO-2017.1	0
SO_C_20170719_R_1723.JPG	2017-07-19 13:25:15	58.51843611	-136.1095194	225	Random	0	0	1	0	Good	LFT	2017-09-14	SO-2017.1	0
SO_C_20170719_R_1724.JPG	2017-07-19 13:25:16	58.51844167	-136.1086667	225	Random	0	0	0	0	Good	LFT	2017-09-14	SO-2017.1	0
SO_C_20170719_R_1725.JPG	2017-07-19 13:25:17	58.51845	-136.1078167	226	Random	0	0	0	0	Good	LFT	2017-09-14	SO-2017.1	0
SO_C_20170719_R_1726.JPG	2017-07-19 13:25:18	58.51845278	-136.1069639	226	Random	0	0	0	0	Good	LFT	2017-09-14	SO-2017.1	0
SO_C_20170719_R_1727.JPG	2017-07-19 13:25:19	58.51845	-136.1061111	226	Random	0	0	0	0	Good	LFT	2017-09-14	SO-2017.1	0
SO_C_20170719_R_1728.JPG	2017-07-19 13:25:20	58.51844444	-136.1052583	226	Random	0	0	0	0	Good	LFT	2017-09-14	SO-2017.1	0
SO_C_20170719_R_1729.JPG	2017-07-19 13:25:21	58.51843333	-136.1044056	225	Random	0	0	0	0	Good	LFT	2017-09-14	SO-2017.1	0
SO_C_20170719_R_1730.JPG	2017-07-19 13:25:22	58.51842222	-136.10355	225	Random	0	0	0	0	Good	LFT	2017-09-14	SO-2017.1	0
SO_C_20170719_R_1731.JPG	2017-07-19 13:25:23	58.51840556	-136.1026917	224	Random	0	0	1	0	Good	LFT	2017-09-14	SO-2017.1	0
SO_C_20170719_R_1732.JPG	2017-07-19 13:25:24	58.51838889	-136.1018333	224	Random	0	0	0	0	Good	LFT	2017-09-14	SO-2017.1	0
SO_C_20170719_R_1733.JPG	2017-07-19 13:25:25	58.51836944	-136.1009722	224	Random	0	0	0	0	Good	LFT	2017-09-14	SO-2017.1	0
SO_C_20170719_R_1734.JPG	2017-07-19 13:25:26	58.51835278	-136.1001111	223	Random	0	0	0	0	Good	LFT	2017-09-14	SO-2017.1	0
SO_C_20170719_R_1735.JPG	2017-07-19 13:25:27	58.51833611	-136.0992472	223	Random	0	0	0	0	Good	LFT	2017-09-14	SO-2017.1	0
SO_C_20170719_R_1736.JPG	2017-07-19 13:25:28	58.51832222	-136.0983833	223	Random	0	0	0	0	Good	LFT	2017-09-14	SO-2017.1	0
SO_C_20170719_R_1737.JPG	2017-07-19 13:25:29	58.51830833	-136.0975167	223	Random	0	0	0	0	Good	LFT	2017-09-14	SO-2017.1	0
SO_C_20170719_R_1738.JPG	2017-07-19 13:25:30	58.51829722	-136.0966528	224	Random	0	0	0	0	Good	LFT	2017-09-14	SO-2017.1	0
SO_C_20170719_R_1739.JPG	2017-07-19 13:25:31	58.51829444	-136.0957889	224	Random	0	0	0	0	Good	LFT	2017-09-14	SO-2017.1	0
SO_C_20170719_R_1740.JPG	2017-07-19 13:25:32	58.51829444	-136.0949278	224	Random	0	0	0	0	Good	LFT	2017-09-14	SO-2017.1	0
SO_C_20170719_R_1741.JPG	2017-07-19 13:25:33	58.51830278	-136.0940694	225	Random	0	0	0	0	Good	LFT	2017-09-14	SO-2017.1	0
SO_C_20170719_R_1742.JPG	2017-07-19 13:25:34	58.51831389	-136.0932111	225	Random	0	0	0	0	Good	LFT	2017-09-14	SO-2017.1	0
SO_C_20170719_R_1743.JPG	2017-07-19 13:25:35	58.51833056	-136.0923556	227	Random	0	0	0	0	Good	LFT	2017-09-14	SO-2017.1	0
SO_C_20170719_R_1744.JPG	2017-07-19 13:25:36	58.51835	-136.0915	227	Random	0	0	0	0	Good	LFT	2017-09-14	SO-2017.1	0
SO_C_20170719_R_1745.JPG	2017-07-19 13:25:37	58.51837222	-136.0906417	227	Random	0	0	0	0	Good	LFT	2017-09-14	SO-2017.1	0
SO_C_20170719_R_1746.JPG	2017-07-19 13:25:38	58.51839444	-136.0897861	227	Random	0	0	0	0	Good	LFT	2017-09-14	SO-2017.1	0
SO_C_20170719_R_1747.JPG	2017-07-19 13:25:39	58.51841389	-136.088925	228	Random	0	0	0	0	Good	LFT	2017-09-14	SO-2017.1	0
SO_C_20170719_R_1748.JPG	2017-07-19 13:25:40	58.51843611	-136.0880639	228	Random	0	0	0	0	Good	LFT	2017-09-14	SO-2017.1	0
SO_C_20170719_R_1749.JPG	2017-07-19 13:25:41	58.51845278	-136.0872	228	Random	0	0	0	0	Good	LFT	2017-09-14	SO-2017.1	0
SO_C_20170719_R_1750.JPG	2017-07-19 13:25:42	58.51846944	-136.0863333	227	Random	0	0	0	0	Good	LFT	2017-09-14	SO-2017.1	0
SO_C_20170719_R_1751.JPG	2017-07-19 13:25:43	58.51848333	-136.0854639	227	Random	0	0	0	0	Good	LFT	2017-09-14	SO-2017.1	0
SO_C_20170719_R_1752.JPG	2017-07-19 13:25:44	58.51849444	-136.0845917	227	Random	0	0	0	0	Good	LFT	2017-09-14	SO-2017.1	0
SO_C_20170719_R_1753.JPG	2017-07-19 13:25:45	58.51850278	-136.0837194	227	Random	0	0	0	0	Good	LFT	2017-09-14	SO-2017.1	0
SO_C_20170719_R_1754.JPG	2017-07-19 13:25:46	58.51850556	-136.0828417	227	Random	0	0	0	0	Good	LFT	2017-09-14	SO-2017.1	0
SO_C_20170719_R_1755.JPG	2017-07-19 13:25:47	58.51850833	-136.0819611	227	Random	0	0	0	0	Good	LFT	2017-09-14	SO-2017.1	0
SO_C_20170719_R_1756.JPG	2017-07-19 13:25:48	58.51850833	-136.0810778	226	Random	0	0	0	0	Good	LFT	2017-09-14	SO-2017.1	0
SO_C_20170719_R_1757.JPG	2017-07-19 13:25:49	58.51850556	-136.0801944	225	Random	0	0	0	0	Good	LFT	2017-09-14	SO-2017.1	0
SO_C_20170719_R_1758.JPG	2017-07-19 13:25:50	58.51850278	-136.0793056	224	Random	0	0	0	0	Good	LFT	2017-09-14	SO-2017.1	0
SO_C_20170719_R_1759.JPG	2017-07-19 13:25:51	58.51849722	-136.0784167	223	Random	0	0	0	0	Good	LFT	2017-09-14	SO-2017.1	0
SO_C_20170719_R_1760.JPG	2017-07-19 13:25:52	58.51849167	-136.0775278	221	Random	0	0	0	0	Good	LFT	2017-09-14	SO-2017.1	0
SO_C_20170719_R_1761.JPG	2017-07-19 13:25:53	58.51848889	-136.0766389	221	Random	0	0	0	0	Good	LFT	2017-09-14	SO-2017.1	0
SO_C_20170719_R_1762.JPG	2017-07-19 13:25:54	58.51848333	-136.0757528	220	Random	0	0	0	0	Good	LFT	2017-09-14	SO-2017.1	0
SO_C_20170719_R_1763.JPG	2017-07-19 13:25:55	58.51848333	-136.0748722	220	Random	0	0	0	0	Good	LFT	2017-09-14	SO-2017.1	0
SO_C_20170719_R_1764.JPG	2017-07-19 13:25:56	58.51848333	-136.0739972	220	Random	0	0	0	0	Good	LFT	2017-09-14	SO-2017.1	0
SO_C_20170719_R_1765.JPG	2017-07-19 13:25:57	58.51848889	-136.0731278	222	Random	0	0	1	0	Good	LFT	2017-09-14	SO-2017.1	0
SO_C_20170719_R_1766.JPG	2017-07-19 13:25:58	58.51849722	-136.0722611	221	Random	0	0	1	0	Good	LFT	2017-09-14	SO-2017.1	0
SO_C_20170719_R_1767.JPG	2017-07-19 13:25:59	58.51850833	-136.0714028	222	Random	0	0	1	0	Good	LFT	2017-09-14	SO-2017.1	0
SO_C_20170719_R_1768.JPG	2017-07-19 13:26:00	58.51852222	-136.0705472	222	Random	0	0	1	0	Good	LFT	2017-09-14	SO-2017.1	0
SO_C_20170719_R_1769.JPG	2017-07-19 13:26:01	58.51853889	-136.0696944	223	Random	0	0	1	0	Good	LFT	2017-09-14	SO-2017.1	0
SO_C_20170719_R_1770.JPG	2017-07-19 13:26:02	58.51855556	-136.0688472	223	Random	0	0	0	0	Good	LFT	2017-09-14	SO-2017.1	0
SO_C_20170719_R_1771.JPG	2017-07-19 13:26:03	58.51857778	-136.068	223	Random	0	0	1	0	Good	LFT	2017-09-14	SO-2017.1	0
SO_C_20170719_R_1772.JPG	2017-07-19 13:26:04	58.5186	-136.0671528	223	Random	0	0	0	0	Good	LFT	2017-09-14	SO-2017.1	0
SO_C_20170719_R_1773.JPG	2017-07-19 13:26:05	58.518625	-136.0663083	222	Random	0	0	0	0	Good	LFT	2017-09-14	SO-2017.1	0
SO_C_20170719_R_1774.JPG	2017-07-19 13:26:06	58.51864722	-136.0654639	222	Random	0	0	0	0	Good	LFT	2017-09-14	SO-2017.1	0
SO_C_20170719_R_1775.JPG	2017-07-19 13:26:07	58.51867222	-136.0646222	222	Random	0	0	1	0	Good	LFT	2017-09-14	SO-2017.1	0
SO_C_20170719_R_1776.JPG	2017-07-19 13:26:08	58.51869444	-136.0637833	222	Random	0	0	1	0	Good	LFT	2017-09-14	SO-2017.1	0
SO_C_20170719_R_1777.JPG	2017-07-19 13:26:09	58.51871667	-136.0629417	221	Random	0	0	1	0	Good	LFT	2017-09-14	SO-2017.1	0
SO_C_20170719_R_1778.JPG	2017-07-19 13:26:10	58.51873611	-136.0621028	221	Random	0	0	1	0	Good	LFT	2017-09-14	SO-2017.1	0
SO_C_20170719_R_1779.JPG	2017-07-19 13:26:11	58.51875556	-136.0612639	220	Random	0	0	1	0	Good	LFT	2017-09-14	SO-2017.1	0
SO_C_20170719_R_1780.JPG	2017-07-19 13:26:12	58.51877222	-136.0604278	219	Random	0	0	1	0	Good	LFT	2017-09-14	SO-2017.1	0
SO_C_20170719_R_1781.JPG	2017-07-19 13:26:13	58.51878889	-136.0595889	219	Random	0	0	1	0	Good	LFT	2017-09-14	SO-2017.1	0
SO_C_20170719_R_1782.JPG	2017-07-19 13:26:14	58.51880556	-136.05875	218	Random	0	0	1	0	Good	LFT	2017-09-14	SO-2017.1	0
SO_C_20170719_R_1783.JPG	2017-07-19 13:26:15	58.51881944	-136.0579083	217	Random	0	0	1	0	Good	LFT	2017-09-14	SO-2017.1	0
SO_C_20170719_R_1784.JPG	2017-07-19 13:26:16	58.51883056	-136.0570694	217	Random	0	0	1	0	Good	LFT	2017-09-14	SO-2017.1	0
SO_C_20170719_R_1785.JPG	2017-07-19 13:26:17	58.51884167	-136.0562306	217	Random	0	0	1	0	Good	LFT	2017-09-14	SO-2017.1	0
SO_C_20170719_R_1786.JPG	2017-07-19 13:26:18	58.51885278	-136.0553944	216	Random	1	0	1	0	Good	LFT	2017-09-26	SO-2017.1	0
SO_C_20170719_R_1787.JPG	2017-07-19 13:26:19	58.51886111	-136.0545583	215	Random	1	0	1	0	Good	LFT	2017-09-26	SO-2017.1	0
SO_C_20170719_R_1788.JPG	2017-07-19 13:26:20	58.51886944	-136.0537278	216	Random	0	0	1	0	Good	LFT	2017-09-14	SO-2017.1	0
SO_C_20170719_R_1789.JPG	2017-07-19 13:26:21	58.51887778	-136.0529	216	Random	0	0	1	0	Good	LFT	2017-09-14	SO-2017.1	0
SO_C_20170719_R_1790.JPG	2017-07-19 13:26:22	58.51888611	-136.0520778	217	Random	0	0	1	0	Good	LFT	2017-09-14	SO-2017.1	0
SO_C_20170719_R_1791.JPG	2017-07-19 13:26:23	58.51889444	-136.0512583	217	Random	0	0	1	0	Good	LFT	2017-09-14	SO-2017.1	0
SO_C_20170719_R_1792.JPG	2017-07-19 13:26:24	58.51890278	-136.0504417	217	Random	0	0	1	0	Good	LFT	2017-09-14	SO-2017.1	0
SO_C_20170719_R_1793.JPG	2017-07-19 13:26:25	58.51891111	-136.0496306	217	Random	0	0	1	0	Good	LFT	2017-09-14	SO-2017.1	0
SO_C_20170719_R_1794.JPG	2017-07-19 13:26:26	58.51892222	-136.0488194	217	Random	0	0	1	0	Good	LFT	2017-09-14	SO-2017.1	0
SO_C_20170719_R_1795.JPG	2017-07-19 13:26:27	58.51893333	-136.0480083	217	Random	0	0	1	0	Good	LFT	2017-09-14	SO-2017.1	0
SO_C_20170719_R_1796.JPG	2017-07-19 13:26:28	58.51894444	-136.0472	217	Random	0	0	1	0	Good	LFT	2017-09-14	SO-2017.1	0
SO_C_20170719_R_1797.JPG	2017-07-19 13:26:29	58.51895556	-136.0463917	217	Random	0	0	1	0	Good	LFT	2017-09-14	SO-2017.1	0
SO_C_20170719_R_1798.JPG	2017-07-19 13:26:30	58.51896667	-136.0455833	217	Random	0	0	1	0	Good	LFT	2017-09-14	SO-2017.1	0
SO_C_20170719_R_1799.JPG	2017-07-19 13:26:31	58.518975	-136.044775	217	Random	0	0	1	0	Good	LFT	2017-09-14	SO-2017.1	0
SO_C_20170719_R_1800.JPG	2017-07-19 13:26:32	58.51898333	-136.0439667	217	Random	0	0	0	0	Good	LFT	2017-09-14	SO-2017.1	0
SO_C_20170719_R_1801.JPG	2017-07-19 13:26:33	58.51899167	-136.0431556	216	Random	0	0	0	0	Good	LFT	2017-09-14	SO-2017.1	0
SO_C_20170719_R_1802.JPG	2017-07-19 13:26:34	58.51899722	-136.0423472	216	Random	0	0	0	0	Good	LFT	2017-09-14	SO-2017.1	0
SO_C_20170719_R_1803.JPG	2017-07-19 13:26:35	58.519	-136.0415389	216	Random	0	0	0	0	Good	LFT	2017-09-14	SO-2017.1	0
SO_C_20170719_R_1804.JPG	2017-07-19 13:26:36	58.51900556	-136.0407278	215	Random	0	0	0	0	Good	LFT	2017-09-14	SO-2017.1	0
SO_C_20170719_R_1805.JPG	2017-07-19 13:26:37	58.51900556	-136.0399194	215	Random	0	0	0	0	Good	LFT	2017-09-14	SO-2017.1	0
SO_C_20170719_R_1806.JPG	2017-07-19 13:26:38	58.51900833	-136.0391139	215	Random	0	0	0	0	Good	LFT	2017-09-14	SO-2017.1	0
SO_C_20170719_R_1807.JPG	2017-07-19 13:26:39	58.51900833	-136.0383056	214	Random	1	0	0	0	Good	LFT	2017-09-26	SO-2017.1	0
SO_C_20170719_R_1808.JPG	2017-07-19 13:26:40	58.51900833	-136.0375	215	Random	0	0	0	0	Good	LFT	2017-09-14	SO-2017.1	0
SO_C_20170719_R_1809.JPG	2017-07-19 13:26:41	58.51901111	-136.0366972	215	Random	0	0	0	0	Good	LFT	2017-09-14	SO-2017.1	0
SO_C_20170719_R_1810.JPG	2017-07-19 13:26:42	58.51901667	-136.0358972	215	Random	0	0	0	0	Good	LFT	2017-09-14	SO-2017.1	0
SO_C_20170719_R_1811.JPG	2017-07-19 13:26:43	58.519025	-136.0350972	216	Random	0	0	0	0	Good	LFT	2017-09-14	SO-2017.1	0
SO_C_20170719_R_1812.JPG	2017-07-19 13:26:44	58.51903333	-136.0342972	216	Random	0	0	1	0	Good	LFT	2017-09-14	SO-2017.1	0
SO_C_20170719_R_1813.JPG	2017-07-19 13:26:45	58.51904167	-136.0335028	216	Random	0	0	0	0	Good	LFT	2017-09-14	SO-2017.1	0
SO_C_20170719_R_1814.JPG	2017-07-19 13:26:46	58.51905278	-136.0327083	216	Random	0	0	0	0	Good	LFT	2017-09-14	SO-2017.1	0
SO_C_20170719_R_1815.JPG	2017-07-19 13:26:47	58.51906111	-136.0319167	216	Random	0	0	0	0	Good	LFT	2017-09-14	SO-2017.1	0
SO_C_20170719_R_1816.JPG	2017-07-19 13:26:48	58.51907222	-136.031125	216	Random	0	0	0	0	Good	LFT	2017-09-14	SO-2017.1	0
SO_C_20170719_R_1817.JPG	2017-07-19 13:26:49	58.51908056	-136.0303333	217	Random	0	0	0	0	Good	LFT	2017-09-14	SO-2017.1	0
SO_C_20170719_R_1818.JPG	2017-07-19 13:26:50	58.51908611	-136.0295444	217	Random	0	0	0	0	Good	LFT	2017-09-14	SO-2017.1	0
SO_C_20170719_R_1819.JPG	2017-07-19 13:26:51	58.51909167	-136.0287556	217	Random	0	0	0	0	Good	LFT	2017-09-14	SO-2017.1	0
SO_C_20170719_R_1820.JPG	2017-07-19 13:26:52	58.51909444	-136.0279639	217	Random	0	0	0	0	Good	LFT	2017-09-14	SO-2017.1	0
SO_C_20170719_R_1821.JPG	2017-07-19 13:26:53	58.51909444	-136.0271722	218	Random	0	0	0	0	Good	LFT	2017-09-14	SO-2017.1	0
SO_C_20170719_R_1822.JPG	2017-07-19 13:26:54	58.51909167	-136.0263778	218	Random	0	0	0	0	Good	LFT	2017-09-14	SO-2017.1	0
SO_C_20170719_R_1823.JPG	2017-07-19 13:26:55	58.51908889	-136.0255833	218	Random	0	0	1	0	Good	LFT	2017-09-14	SO-2017.1	0
SO_C_20170719_R_1824.JPG	2017-07-19 13:26:56	58.51908333	-136.0247917	219	Random	0	0	1	0	Good	LFT	2017-09-14	SO-2017.1	0
SO_C_20170719_R_1825.JPG	2017-07-19 13:26:57	58.51907778	-136.0239972	219	Random	0	0	1	0	Good	LFT	2017-09-14	SO-2017.1	0
SO_C_20170719_R_1826.JPG	2017-07-19 13:26:58	58.519075	-136.0232056	220	Random	0	0	1	1	Good	LFT	2017-09-14	SO-2017.1	0
SO_C_20170719_R_1827.JPG	2017-07-19 13:26:59	58.51906944	-136.0224139	221	Random	0	0	1	1	Good	LFT	2017-09-14	SO-2017.1	0
SO_C_20170719_R_1828.JPG	2017-07-19 13:27:00	58.51906944	-136.0216194	221	Random	0	0	1	1	Good	LFT	2017-09-14	SO-2017.1	0
SO_C_20170719_R_1829.JPG	2017-07-19 13:27:01	58.51906944	-136.0208278	221	Random	0	0	1	1	Good	LFT	2017-09-14	SO-2017.1	0
SO_C_20170719_R_1830.JPG	2017-07-19 13:27:02	58.51906944	-136.0200333	221	Random	0	0	0	1	Good	LFT	2017-09-14	SO-2017.1	0
SO_C_20170719_R_1831.JPG	2017-07-19 13:27:03	58.51907222	-136.0192417	221	Random	0	0	0	1	Good	LFT	2017-09-14	SO-2017.1	0
SO_C_20170719_R_1832.JPG	2017-07-19 13:27:04	58.519075	-136.0184444	221	Random	0	0	0	1	Good	LFT	2017-09-14	SO-2017.1	0
SO_C_20170719_R_1833.JPG	2017-07-19 13:27:05	58.51908056	-136.0176472	220	Random	0	0	0	1	Good	LFT	2017-09-14	SO-2017.1	0
SO_C_20170719_R_1834.JPG	2017-07-19 13:27:06	58.51908611	-136.0168444	219	Random	0	0	0	1	Good	LFT	2017-09-14	SO-2017.1	0
SO_C_20170719_R_1835.JPG	2017-07-19 13:27:07	58.51909167	-136.0160389	219	Random	0	0	0	1	Good	LFT	2017-09-14	SO-2017.1	0
SO_C_20170719_R_1836.JPG	2017-07-19 13:27:08	58.5191	-136.0152306	218	Random	0	0	0	1	Good	LFT	2017-09-14	SO-2017.1	0
SO_C_20170719_R_1837.JPG	2017-07-19 13:27:09	58.51910278	-136.0144222	218	Random	0	0	0	1	Good	LFT	2017-09-14	SO-2017.1	0
SO_C_20170719_R_1838.JPG	2017-07-19 13:27:10	58.51910833	-136.0136111	218	Random	0	0	0	1	Good	LFT	2017-09-14	SO-2017.1	0
SO_C_20170719_R_1839.JPG	2017-07-19 13:27:11	58.51910833	-136.0127972	219	Random	0	0	0	1	Good	LFT	2017-09-14	SO-2017.1	0
SO_C_20170719_R_1840.JPG	2017-07-19 13:27:12	58.51911111	-136.0119833	218	Random	0	0	0	1	Good	LFT	2017-09-14	SO-2017.1	0
SO_C_20170719_R_1841.JPG	2017-07-19 13:27:13	58.51911111	-136.0111694	218	Random	0	0	0	1	Good	LFT	2017-09-14	SO-2017.1	0
SO_C_20170719_R_1842.JPG	2017-07-19 13:27:14	58.51911389	-136.0103528	220	Random	0	0	0	1	Good	LFT	2017-09-14	SO-2017.1	0
SO_C_20170719_R_1843.JPG	2017-07-19 13:27:15	58.51911944	-136.0095306	221	Random	0	0	0	1	Good	LFT	2017-09-14	SO-2017.1	0
SO_C_20170719_R_1844.JPG	2017-07-19 13:27:16	58.51912778	-136.0087056	223	Random	0	0	0	1	Good	LFT	2017-09-14	SO-2017.1	0
SO_C_20170719_R_1845.JPG	2017-07-19 13:27:17	58.51913889	-136.007875	224	Random	0	0	0	1	Good	LFT	2017-09-14	SO-2017.1	0
SO_C_20170719_R_1846.JPG	2017-07-19 13:27:18	58.51914722	-136.0070389	226	Random	0	0	0	1	Good	LFT	2017-09-14	SO-2017.1	0
SO_C_20170719_R_1847.JPG	2017-07-19 13:27:19	58.51915556	-136.0062	226	Random	0	0	0	1	Good	LFT	2017-09-14	SO-2017.1	0
SO_C_20170719_R_1848.JPG	2017-07-19 13:27:20	58.51916389	-136.0053556	227	Random	0	0	0	1	Good	LFT	2017-09-14	SO-2017.1	0
SO_C_20170719_R_1849.JPG	2017-07-19 13:27:21	58.51916667	-136.0045083	227	Random	0	0	0	1	Good	LFT	2017-09-14	SO-2017.1	0
SO_C_20170719_R_1850.JPG	2017-07-19 13:27:22	58.51916667	-136.0036528	226	Random	0	0	0	1	Good	LFT	2017-09-14	SO-2017.1	0
SO_C_20170719_R_1851.JPG	2017-07-19 13:27:23	58.51916667	-136.0027917	225	Random	0	0	0	1	Good	LFT	2017-09-14	SO-2017.1	0
SO_C_20170719_R_1852.JPG	2017-07-19 13:27:24	58.51916111	-136.0019278	225	Random	0	0	0	1	Good	LFT	2017-09-14	SO-2017.1	0
SO_C_20170719_R_1853.JPG	2017-07-19 13:27:25	58.51915556	-136.0010611	225	Random	0	0	0	1	Good	LFT	2017-09-14	SO-2017.1	0
SO_C_20170719_R_1854.JPG	2017-07-19 13:27:26	58.51915	-136.0001889	224	Random	0	0	0	1	Good	LFT	2017-09-14	SO-2017.1	0
SO_C_20170719_R_1855.JPG	2017-07-19 13:27:27	58.51915	-135.9993111	223	Random	0	0	0	1	Good	LFT	2017-09-14	SO-2017.1	0
SO_C_20170719_R_1856.JPG	2017-07-19 13:27:28	58.51915278	-135.9984333	224	Random	0	0	0	1	Good	LFT	2017-09-14	SO-2017.1	0
SO_C_20170719_R_1857.JPG	2017-07-19 13:27:29	58.51915556	-135.9975556	223	Random	0	0	0	1	Good	LFT	2017-09-14	SO-2017.1	0
SO_C_20170719_R_1858.JPG	2017-07-19 13:27:30	58.51916389	-135.996675	222	Random	0	0	0	1	Good	LFT	2017-09-14	SO-2017.1	0
SO_C_20170719_R_1859.JPG	2017-07-19 13:27:31	58.51917222	-135.9958	222	Random	0	0	0	1	Good	LFT	2017-09-14	SO-2017.1	0
SO_C_20170719_R_1860.JPG	2017-07-19 13:27:32	58.51918333	-135.9949278	221	Random	0	0	0	1	Good	LFT	2017-09-14	SO-2017.1	0
SO_C_20170719_R_1861.JPG	2017-07-19 13:27:33	58.5192	-135.9940583	221	Random	0	0	0	1	Good	LFT	2017-09-14	SO-2017.1	0
SO_C_20170719_R_1862.JPG	2017-07-19 13:27:34	58.51921944	-135.9932	221	Random	0	0	0	1	Good	LFT	2017-09-14	SO-2017.1	0
SO_C_20170719_R_1863.JPG	2017-07-19 13:27:35	58.51924167	-135.9923444	222	Random	0	0	0	1	Good	LFT	2017-09-14	SO-2017.1	0
SO_C_20170719_R_1864.JPG	2017-07-19 13:27:36	58.51926667	-135.9914972	222	Random	0	0	0	1	Good	LFT	2017-09-14	SO-2017.1	0
SO_C_20170719_R_1865.JPG	2017-07-19 13:27:37	58.51929167	-135.99065	222	Random	0	0	0	1	Good	LFT	2017-09-14	SO-2017.1	0
SO_C_20170719_R_1866.JPG	2017-07-19 13:27:38	58.51931944	-135.9898056	221	Random	0	0	1	1	Good	LFT	2017-09-14	SO-2017.1	0
SO_C_20170719_R_1867.JPG	2017-07-19 13:27:39	58.51934722	-135.9889639	221	Random	0	0	1	1	Good	LFT	2017-09-14	SO-2017.1	0
SO_C_20170719_R_1868.JPG	2017-07-19 13:27:40	58.51937222	-135.988125	220	Random	0	0	1	1	Good	LFT	2017-09-14	SO-2017.1	0
SO_C_20170719_R_1869.JPG	2017-07-19 13:27:41	58.51939722	-135.9872833	219	Random	0	0	1	0	Good	LFT	2017-09-14	SO-2017.1	0
SO_C_20170719_R_1870.JPG	2017-07-19 13:27:42	58.51941667	-135.9864444	218	Random	0	0	1	0	Good	LFT	2017-09-14	SO-2017.1	0
SO_C_20170719_R_1871.JPG	2017-07-19 13:27:43	58.51943611	-135.9856056	217	Random	0	0	0	0	Good	LFT	2017-09-14	SO-2017.1	0
SO_C_20170719_R_1872.JPG	2017-07-19 13:27:44	58.51945278	-135.9847667	216	Random	0	0	0	0	Good	LFT	2017-09-14	SO-2017.1	0
SO_C_20170719_R_1873.JPG	2017-07-19 13:27:45	58.51946667	-135.9839306	215	Random	0	0	0	0	Good	LFT	2017-09-14	SO-2017.1	0
SO_C_20170719_R_1874.JPG	2017-07-19 13:27:46	58.51948333	-135.9830944	214	Random	0	0	0	0	Good	LFT	2017-09-14	SO-2017.1	0
SO_C_20170719_R_1875.JPG	2017-07-19 13:27:47	58.5195	-135.9822639	214	Random	0	0	0	0	Good	LFT	2017-09-14	SO-2017.1	0
SO_C_20170719_R_1876.JPG	2017-07-19 13:27:48	58.51951667	-135.9814333	214	Random	0	0	0	0	Good	LFT	2017-09-14	SO-2017.1	0
SO_C_20170719_R_1877.JPG	2017-07-19 13:27:49	58.51953056	-135.9806028	214	Random	0	0	0	0	Good	LFT	2017-09-14	SO-2017.1	0
SO_C_20170719_R_1878.JPG	2017-07-19 13:27:50	58.51954722	-135.9797778	214	Random	0	0	0	0	Good	LFT	2017-09-14	SO-2017.1	0
SO_C_20170719_R_1879.JPG	2017-07-19 13:27:51	58.51955833	-135.9789528	214	Random	0	0	0	0	Good	LFT	2017-09-14	SO-2017.1	0
SO_C_20170719_R_1880.JPG	2017-07-19 13:27:52	58.51957222	-135.9781278	214	Random	0	0	0	0	Good	LFT	2017-09-14	SO-2017.1	0
SO_C_20170719_R_1881.JPG	2017-07-19 13:27:53	58.51958611	-135.9773056	214	Random	0	0	0	0	Good	LFT	2017-09-14	SO-2017.1	0
SO_C_20170719_R_1882.JPG	2017-07-19 13:27:54	58.5196	-135.9764861	215	Random	0	0	0	0	Good	LFT	2017-09-14	SO-2017.1	0
SO_C_20170719_R_1883.JPG	2017-07-19 13:27:55	58.51961111	-135.9756667	215	Random	0	0	0	0	Good	LFT	2017-09-14	SO-2017.1	0
SO_C_20170719_R_1884.JPG	2017-07-19 13:27:56	58.51962222	-135.9748528	216	Random	0	0	0	0	Good	LFT	2017-09-14	SO-2017.1	0
SO_C_20170719_R_1885.JPG	2017-07-19 13:27:57	58.51963333	-135.9740389	216	Random	0	0	0	0	Good	LFT	2017-09-14	SO-2017.1	0
SO_C_20170719_R_1886.JPG	2017-07-19 13:27:58	58.51964167	-135.9732278	216	Random	0	0	0	0	Good	LFT	2017-09-14	SO-2017.1	0
SO_C_20170719_R_1887.JPG	2017-07-19 13:27:59	58.51965	-135.9724167	216	Random	0	0	0	0	Good	LFT	2017-09-14	SO-2017.1	0
SO_C_20170719_R_1888.JPG	2017-07-19 13:28:00	58.51965556	-135.9716083	216	Random	0	0	0	0	Good	LFT	2017-09-14	SO-2017.1	0
SO_C_20170719_R_1889.JPG	2017-07-19 13:28:01	58.51966389	-135.9708	217	Random	0	0	1	0	Good	LFT	2017-09-14	SO-2017.1	0
SO_C_20170719_R_1890.JPG	2017-07-19 13:28:02	58.51967222	-135.9699944	217	Random	0	0	1	0	Good	LFT	2017-09-14	SO-2017.1	0
SO_C_20170719_R_1891.JPG	2017-07-19 13:28:03	58.51967778	-135.9691833	217	Random	0	0	1	0	Good	LFT	2017-09-14	SO-2017.1	0
SO_C_20170719_R_1892.JPG	2017-07-19 13:28:04	58.51968333	-135.968375	218	Random	0	0	0	0	Good	LFT	2017-09-14	SO-2017.1	0
SO_C_20170719_R_1893.JPG	2017-07-19 13:28:05	58.51968611	-135.9675639	217	Random	0	0	0	0	Good	LFT	2017-09-14	SO-2017.1	0
SO_C_20170719_R_1894.JPG	2017-07-19 13:28:06	58.51968611	-135.96675	217	Random	0	0	0	0	Good	LFT	2017-09-14	SO-2017.1	0
SO_C_20170719_R_1895.JPG	2017-07-19 13:28:07	58.51968333	-135.9659361	218	Random	0	0	1	0	Good	LFT	2017-09-14	SO-2017.1	0
SO_C_20170719_R_1896.JPG	2017-07-19 13:28:08	58.51967778	-135.9651194	218	Random	0	0	1	0	Good	LFT	2017-09-14	SO-2017.1	0
SO_C_20170719_R_1897.JPG	2017-07-19 13:28:09	58.51967222	-135.9643028	219	Random	0	0	0	0	Good	LFT	2017-09-14	SO-2017.1	0
SO_C_20170719_R_1898.JPG	2017-07-19 13:28:10	58.51966667	-135.9634861	219	Random	0	0	0	0	Good	LFT	2017-09-14	SO-2017.1	0
SO_C_20170719_R_1899.JPG	2017-07-19 13:28:11	58.51965833	-135.9626694	218	Random	0	0	0	0	Good	LFT	2017-09-14	SO-2017.1	0
SO_C_20170719_R_1900.JPG	2017-07-19 13:28:12	58.51965278	-135.9618528	219	Random	0	0	1	0	Good	LFT	2017-09-14	SO-2017.1	0
SO_C_20170719_R_1901.JPG	2017-07-19 13:28:13	58.51964722	-135.9610361	220	Random	0	0	1	0	Good	LFT	2017-09-14	SO-2017.1	0
SO_C_20170719_R_1902.JPG	2017-07-19 13:28:14	58.51964444	-135.9602167	220	Random	0	0	1	0	Good	LFT	2017-09-14	SO-2017.1	0
SO_C_20170719_R_1903.JPG	2017-07-19 13:28:15	58.51963889	-135.9594	220	Random	0	0	1	0	Good	LFT	2017-09-14	SO-2017.1	0
SO_C_20170719_R_1904.JPG	2017-07-19 13:28:16	58.51963611	-135.9585833	221	Random	0	0	1	0	Good	LFT	2017-09-14	SO-2017.1	0
SO_C_20170719_R_1905.JPG	2017-07-19 13:28:17	58.51963611	-135.9577667	221	Random	0	0	1	0	Good	LFT	2017-09-14	SO-2017.1	0
SO_C_20170719_R_1906.JPG	2017-07-19 13:28:18	58.51963611	-135.9569444	221	Random	0	0	1	0	Good	LFT	2017-09-14	SO-2017.1	0
SO_C_20170719_R_1907.JPG	2017-07-19 13:28:19	58.51963611	-135.956125	220	Random	0	0	1	0	Good	LFT	2017-09-14	SO-2017.1	0
SO_C_20170719_R_1908.JPG	2017-07-19 13:28:20	58.51963889	-135.9553	221	Random	0	0	1	0	Good	LFT	2017-09-14	SO-2017.1	0
SO_C_20170719_R_1909.JPG	2017-07-19 13:28:21	58.51964167	-135.954475	220	Random	0	0	1	0	Good	LFT	2017-09-14	SO-2017.1	0
SO_C_20170719_R_1910.JPG	2017-07-19 13:28:22	58.51964167	-135.9536444	219	Random	0	0	0	0	Good	LFT	2017-09-14	SO-2017.1	0
SO_C_20170719_R_1911.JPG	2017-07-19 13:28:23	58.51964167	-135.9528139	219	Random	0	0	1	0	Good	LFT	2017-09-14	SO-2017.1	0
SO_C_20170719_R_1912.JPG	2017-07-19 13:28:24	58.51963889	-135.9519833	218	Random	0	0	1	0	Good	LFT	2017-09-14	SO-2017.1	0
SO_C_20170719_R_1913.JPG	2017-07-19 13:28:25	58.51963611	-135.95115	218	Random	0	0	1	0	Good	LFT	2017-09-14	SO-2017.1	0
SO_C_20170719_R_1914.JPG	2017-07-19 13:28:26	58.51963333	-135.9503139	217	Random	0	0	0	0	Good	LFT	2017-09-14	SO-2017.1	0
SO_C_20170719_R_1915.JPG	2017-07-19 13:28:27	58.51963333	-135.9494806	217	Random	0	0	1	0	Good	LFT	2017-09-14	SO-2017.1	0
SO_C_20170719_R_1916.JPG	2017-07-19 13:28:28	58.51963056	-135.9486444	216	Random	0	0	1	0	Good	LFT	2017-09-14	SO-2017.1	0
SO_C_20170719_R_1917.JPG	2017-07-19 13:28:29	58.51962778	-135.9478083	217	Random	0	0	1	0	Good	LFT	2017-09-14	SO-2017.1	0
SO_C_20170719_R_1918.JPG	2017-07-19 13:28:30	58.519625	-135.946975	217	Random	0	0	1	0	Good	LFT	2017-09-14	SO-2017.1	0
SO_C_20170719_R_1919.JPG	2017-07-19 13:28:31	58.519625	-135.9461417	217	Random	0	0	1	0	Good	LFT	2017-09-14	SO-2017.1	0
SO_C_20170719_R_1920.JPG	2017-07-19 13:28:32	58.51962778	-135.9453083	217	Random	0	0	1	0	Good	LFT	2017-09-14	SO-2017.1	0
SO_C_20170719_R_1921.JPG	2017-07-19 13:28:33	58.51963056	-135.9444778	218	Random	0	0	1	0	Good	LFT	2017-09-14	SO-2017.1	0
SO_C_20170719_R_1922.JPG	2017-07-19 13:28:34	58.51963611	-135.9436472	218	Random	0	0	1	0	Good	LFT	2017-09-14	SO-2017.1	0
SO_C_20170719_R_1923.JPG	2017-07-19 13:28:35	58.51964444	-135.9428194	219	Random	0	0	1	0	Good	LFT	2017-09-14	SO-2017.1	0
SO_C_20170719_R_1924.JPG	2017-07-19 13:28:36	58.51965278	-135.9419944	220	Random	0	0	1	0	Good	LFT	2017-09-14	SO-2017.1	0
SO_C_20170719_R_1925.JPG	2017-07-19 13:28:37	58.51966111	-135.9411694	220	Random	0	0	1	1	Good	LFT	2017-09-14	SO-2017.1	0
SO_C_20170719_R_1926.JPG	2017-07-19 13:28:38	58.51967222	-135.9403472	220	Random	0	0	1	1	Good	LFT	2017-09-14	SO-2017.1	0
SO_C_20170719_R_1927.JPG	2017-07-19 13:28:39	58.51968333	-135.9395222	221	Random	0	0	1	1	Good	LFT	2017-09-14	SO-2017.1	0
SO_C_20170719_R_1928.JPG	2017-07-19 13:28:40	58.51969722	-135.9387	220	Random	0	0	1	0	Good	LFT	2017-09-14	SO-2017.1	0
SO_C_20170719_R_1929.JPG	2017-07-19 13:28:41	58.51971389	-135.937875	220	Random	0	0	1	0	Good	LFT	2017-09-14	SO-2017.1	0
SO_C_20170719_R_1930.JPG	2017-07-19 13:28:42	58.51973333	-135.93705	219	Random	0	0	1	0	Good	LFT	2017-09-14	SO-2017.1	0
SO_C_20170719_R_1931.JPG	2017-07-19 13:28:43	58.51975278	-135.936225	220	Random	0	0	1	0	Good	LFT	2017-09-14	SO-2017.1	0
SO_C_20170719_R_1932.JPG	2017-07-19 13:28:44	58.51977222	-135.9354	220	Random	0	0	1	0	Good	LFT	2017-09-14	SO-2017.1	0
SO_C_20170719_R_1933.JPG	2017-07-19 13:28:45	58.51979167	-135.934575	219	Random	0	0	1	0	Good	LFT	2017-09-14	SO-2017.1	0
SO_C_20170719_R_1934.JPG	2017-07-19 13:28:46	58.51981111	-135.93375	220	Random	0	0	1	0	Good	LFT	2017-09-14	SO-2017.1	0
SO_C_20170719_R_1935.JPG	2017-07-19 13:28:47	58.519825	-135.9329222	219	Random	0	0	1	0	Good	LFT	2017-09-14	SO-2017.1	0
SO_C_20170719_R_1936.JPG	2017-07-19 13:28:48	58.51983889	-135.9320944	219	Random	0	0	1	0	Good	LFT	2017-09-14	SO-2017.1	0
SO_C_20170719_R_1937.JPG	2017-07-19 13:28:49	58.51985	-135.9312667	219	Random	0	0	0	0	Good	LFT	2017-09-14	SO-2017.1	0
SO_C_20170719_R_1938.JPG	2017-07-19 13:28:50	58.51986111	-135.9304361	219	Random	0	0	0	0	Good	LFT	2017-09-14	SO-2017.1	0
SO_C_20170719_R_1939.JPG	2017-07-19 13:28:51	58.51986944	-135.9296028	218	Random	0	0	0	0	Good	LFT	2017-09-14	SO-2017.1	0
SO_C_20170719_R_1940.JPG	2017-07-19 13:28:52	58.51987778	-135.9287722	218	Random	0	0	1	1	Good	LFT	2017-09-14	SO-2017.1	0
SO_C_20170719_R_1941.JPG	2017-07-19 13:28:53	58.51988333	-135.9279361	218	Random	0	0	1	1	Good	LFT	2017-09-14	SO-2017.1	0
SO_C_20170719_R_1942.JPG	2017-07-19 13:28:54	58.51988889	-135.9271028	218	Random	0	0	0	1	Good	LFT	2017-09-14	SO-2017.1	0
SO_C_20170719_R_1943.JPG	2017-07-19 13:28:55	58.51988889	-135.9262667	218	Random	0	0	1	1	Good	LFT	2017-09-14	SO-2017.1	0
SO_C_20170719_R_1944.JPG	2017-07-19 13:28:56	58.51988889	-135.9254306	217	Random	0	0	1	1	Good	LFT	2017-09-14	SO-2017.1	0
SO_C_20170719_R_1945.JPG	2017-07-19 13:28:57	58.51988889	-135.9245944	217	Random	0	0	0	1	Good	LFT	2017-09-14	SO-2017.1	0
SO_C_20170719_R_1946.JPG	2017-07-19 13:28:58	58.51988611	-135.9237556	217	Random	0	0	0	1	Good	LFT	2017-09-14	SO-2017.1	0
SO_C_20170719_R_1947.JPG	2017-07-19 13:28:59	58.51988333	-135.9229194	217	Random	0	0	0	1	Good	LFT	2017-09-14	SO-2017.1	0
SO_C_20170719_R_1948.JPG	2017-07-19 13:29:00	58.51988333	-135.9220806	217	Random	0	0	0	1	Good	LFT	2017-09-14	SO-2017.1	0
SO_C_20170719_R_1949.JPG	2017-07-19 13:29:01	58.51988333	-135.9212444	217	Random	0	0	0	1	Good	LFT	2017-09-14	SO-2017.1	0
SO_C_20170719_R_1950.JPG	2017-07-19 13:29:02	58.51988611	-135.9204083	217	Random	0	0	0	1	Good	LFT	2017-09-14	SO-2017.1	0
SO_C_20170719_R_1951.JPG	2017-07-19 13:29:03	58.51989167	-135.9195722	217	Random	0	0	1	1	Good	LFT	2017-09-14	SO-2017.1	0
SO_C_20170719_R_1952.JPG	2017-07-19 13:29:04	58.5199	-135.9187389	217	Random	0	0	1	1	Good	LFT	2017-09-14	SO-2017.1	0
SO_C_20170719_R_1953.JPG	2017-07-19 13:29:05	58.51990556	-135.9179056	217	Random	0	0	1	0	Good	LFT	2017-09-14	SO-2017.1	0
SO_C_20170719_R_1954.JPG	2017-07-19 13:29:06	58.51991389	-135.917075	217	Random	0	0	1	0	Good	LFT	2017-09-14	SO-2017.1	0
SO_C_20170719_R_1955.JPG	2017-07-19 13:29:07	58.51992222	-135.9162417	218	Random	0	0	1	0	Good	LFT	2017-09-14	SO-2017.1	0
SO_C_20170719_R_1956.JPG	2017-07-19 13:29:08	58.51993333	-135.9154111	218	Random	0	0	1	0	Good	LFT	2017-09-14	SO-2017.1	0
SO_C_20170719_R_1957.JPG	2017-07-19 13:29:09	58.51994167	-135.9145806	218	Random	0	0	0	0	Good	LFT	2017-09-14	SO-2017.1	0
SO_C_20170719_R_1958.JPG	2017-07-19 13:29:10	58.51995	-135.91375	219	Random	0	0	0	0	Good	LFT	2017-09-14	SO-2017.1	0
SO_C_20170719_R_1959.JPG	2017-07-19 13:29:11	58.51995833	-135.9129222	219	Random	0	0	1	0	Good	LFT	2017-09-14	SO-2017.1	0
SO_C_20170719_R_1960.JPG	2017-07-19 13:29:12	58.51996667	-135.9120944	220	Random	0	0	0	0	Good	LFT	2017-09-14	SO-2017.1	0
SO_C_20170719_R_1961.JPG	2017-07-19 13:29:13	58.51997222	-135.9112694	220	Random	0	0	0	0	Good	LFT	2017-09-14	SO-2017.1	0
SO_C_20170719_R_1962.JPG	2017-07-19 13:29:14	58.51997778	-135.9104472	220	Random	0	0	0	0	Good	LFT	2017-09-14	SO-2017.1	0
SO_C_20170719_R_1963.JPG	2017-07-19 13:29:15	58.51998611	-135.909625	221	Random	0	0	0	0	Good	LFT	2017-09-14	SO-2017.1	0
SO_C_20170719_R_1964.JPG	2017-07-19 13:29:16	58.51999167	-135.9088028	222	Random	0	0	0	0	Good	LFT	2017-09-14	SO-2017.1	0
SO_C_20170719_R_1965.JPG	2017-07-19 13:29:17	58.51999722	-135.9079833	222	Random	0	0	0	0	Good	LFT	2017-09-14	SO-2017.1	0
SO_C_20170719_R_1966.JPG	2017-07-19 13:29:18	58.52000278	-135.9071639	223	Random	0	0	0	0	Good	LFT	2017-09-14	SO-2017.1	0
SO_C_20170719_R_1967.JPG	2017-07-19 13:29:19	58.52001111	-135.9063444	223	Random	0	0	0	0	Good	LFT	2017-09-14	SO-2017.1	0
SO_C_20170719_R_1968.JPG	2017-07-19 13:29:20	58.52001667	-135.905525	223	Random	0	0	1	0	Good	LFT	2017-09-14	SO-2017.1	0
SO_C_20170719_R_1969.JPG	2017-07-19 13:29:21	58.52002222	-135.9047028	223	Random	0	0	0	0	Good	LFT	2017-09-14	SO-2017.1	0
SO_C_20170719_R_1970.JPG	2017-07-19 13:29:22	58.52003056	-135.9038778	222	Random	0	0	0	0	Good	LFT	2017-09-14	SO-2017.1	0
SO_C_20170719_R_1971.JPG	2017-07-19 13:29:23	58.52003611	-135.90305	221	Random	0	0	0	0	Good	LFT	2017-09-14	SO-2017.1	0
SO_C_20170719_R_1972.JPG	2017-07-19 13:29:24	58.52003889	-135.9022167	220	Random	0	0	0	0	Good	LFT	2017-09-14	SO-2017.1	0
SO_C_20170719_R_1973.JPG	2017-07-19 13:29:25	58.52004167	-135.9013833	218	Random	0	0	1	0	Good	LFT	2017-09-14	SO-2017.1	0
SO_C_20170719_R_1974.JPG	2017-07-19 13:29:26	58.52004444	-135.9005472	217	Random	0	0	1	0	Good	LFT	2017-09-14	SO-2017.1	0
SO_C_20170719_R_1975.JPG	2017-07-19 13:29:27	58.52004444	-135.8997056	216	Random	0	0	1	0	Good	LFT	2017-09-14	SO-2017.1	0
SO_C_20170719_R_1976.JPG	2017-07-19 13:29:28	58.52004444	-135.8988667	216	Random	0	0	0	0	Good	LFT	2017-09-14	SO-2017.1	0
SO_C_20170719_R_1977.JPG	2017-07-19 13:29:29	58.52004722	-135.8980278	217	Random	0	0	0	0	Good	LFT	2017-09-14	SO-2017.1	0
SO_C_20170719_R_1978.JPG	2017-07-19 13:29:30	58.52004722	-135.8971944	218	Random	0	0	1	0	Good	LFT	2017-09-14	SO-2017.1	0
SO_C_20170719_R_1979.JPG	2017-07-19 13:29:31	58.52004722	-135.8963667	219	Random	0	0	1	0	Good	LFT	2017-09-14	SO-2017.1	0
SO_C_20170719_R_1980.JPG	2017-07-19 13:29:32	58.52004722	-135.8955444	221	Random	0	0	0	0	Good	LFT	2017-09-14	SO-2017.1	0
SO_C_20170719_R_1981.JPG	2017-07-19 13:29:33	58.52004722	-135.894725	222	Random	0	0	0	0	Good	LFT	2017-09-14	SO-2017.1	0
SO_C_20170719_R_1982.JPG	2017-07-19 13:29:34	58.52005	-135.8939056	222	Random	0	0	0	0	Good	LFT	2017-09-14	SO-2017.1	0
SO_C_20170719_R_1983.JPG	2017-07-19 13:29:35	58.52005278	-135.8930833	223	Random	0	0	0	0	Good	LFT	2017-09-14	SO-2017.1	0
SO_C_20170719_R_1984.JPG	2017-07-19 13:29:36	58.52005556	-135.8922639	223	Random	0	0	0	0	Good	LFT	2017-09-14	SO-2017.1	0
SO_C_20170719_R_1985.JPG	2017-07-19 13:29:37	58.52006111	-135.8914389	223	Random	0	0	1	0	Good	LFT	2017-09-14	SO-2017.1	0
SO_C_20170719_R_1986.JPG	2017-07-19 13:29:38	58.52006667	-135.8906111	223	Random	0	0	1	0	Good	LFT	2017-09-14	SO-2017.1	0
SO_C_20170719_R_1987.JPG	2017-07-19 13:29:39	58.52006944	-135.8897806	223	Random	0	0	1	0	Good	LFT	2017-09-14	SO-2017.1	0
SO_C_20170719_R_1988.JPG	2017-07-19 13:29:40	58.52007222	-135.8889472	222	Random	0	0	1	0	Good	LFT	2017-09-14	SO-2017.1	0
SO_C_20170719_R_1989.JPG	2017-07-19 13:29:41	58.52007222	-135.8881083	221	Random	0	0	1	1	Good	LFT	2017-09-14	SO-2017.1	0
SO_C_20170719_R_1990.JPG	2017-07-19 13:29:42	58.52007222	-135.8872667	220	Random	0	0	1	1	Good	LFT	2017-09-14	SO-2017.1	0
SO_C_20170719_R_1991.JPG	2017-07-19 13:29:43	58.52006944	-135.8864194	219	Random	0	0	1	1	Good	LFT	2017-09-14	SO-2017.1	0
SO_C_20170719_R_1992.JPG	2017-07-19 13:29:44	58.52006667	-135.8855694	217	Random	0	0	0	1	Good	LFT	2017-09-14	SO-2017.1	0
SO_C_20170719_R_1993.JPG	2017-07-19 13:29:45	58.52006389	-135.8847194	216	Random	0	0	1	1	Good	LFT	2017-09-14	SO-2017.1	0
SO_C_20170719_R_1994.JPG	2017-07-19 13:29:46	58.52006389	-135.8838694	215	Random	0	0	1	0	Good	LFT	2017-09-14	SO-2017.1	0
SO_C_20170719_R_1995.JPG	2017-07-19 13:29:47	58.52006667	-135.8830222	215	Random	0	0	0	0	Good	LFT	2017-09-14	SO-2017.1	0
SO_C_20170719_R_1996.JPG	2017-07-19 13:29:48	58.52006944	-135.8821778	215	Random	0	0	0	0	Good	LFT	2017-09-14	SO-2017.1	0
SO_C_20170719_R_1997.JPG	2017-07-19 13:29:49	58.520075	-135.8813389	216	Random	0	0	1	0	Good	LFT	2017-09-14	SO-2017.1	0
SO_C_20170719_R_1998.JPG	2017-07-19 13:29:50	58.52007778	-135.8805056	217	Random	0	0	1	0	Good	LFT	2017-09-14	SO-2017.1	0
SO_C_20170719_R_1999.JPG	2017-07-19 13:29:51	58.52008333	-135.8796778	218	Random	0	0	0	0	Good	LFT	2017-09-14	SO-2017.1	0
[truncated: 4,635 more rows]
